# Supplementary material for: Dibrominated addition and substitution of alkenes catalyzed by Mn2(CO)10
Source: Royal Society of Chemistry journal article supplement (doi:10.1039/d1cc04534b), 2021-01-01

## **Dibrominated Addition and Substitution of Alkenes Catalyzed by $\text{Mn}_2(\text{CO})_{10}$**

Xianheng Song<sup>a#</sup>, Shan-Shui Meng<sup>a,b#\*</sup>, Hong Zhang<sup>a</sup>, Yi Jiang<sup>a</sup>, Albert S. C. Chan<sup>a,b</sup>,  
Yong Zou<sup>a,b\*</sup>

<sup>a</sup>School of Pharmaceutical Sciences, Sun Yat-sen University, Guangzhou 510006, China.

<sup>b</sup>Guangdong Provincial Key Laboratory of Chiral Molecule and Drug Discovery, Guangzhou 510006,  
China.

E-mail: [zouyong3@mail.sysu.edu.cn](mailto:zouyong3@mail.sysu.edu.cn); [mengshsh@mail.sysu.edu.cn](mailto:mengshsh@mail.sysu.edu.cn).

## Table of contents

|                                                                             |     |
|-----------------------------------------------------------------------------|-----|
| General Information.....                                                    | S2  |
| General procedure for the dibromination reaction with olefin.....           | S2  |
| Characterization data of products.....                                      | S3  |
| Reference .....                                                             | S16 |
| Optimization of the Reaction Conditions.....                                | S17 |
| The Single Crystal X-ray Diffraction Study of 2o.....                       | S18 |
| The Single Crystal X-ray Diffraction Study of 6h.....                       | S19 |
| Gram-scale Synthesis.....                                                   | S21 |
| Synthesis of 1,1,2,2-terphenylethene (TPE).....                             | S22 |
| Controlled experiments .....                                                | S23 |
| The mass spectra of intermediate (B) and (D). .....                         | S25 |
| Proposed mechanism for Dibrominated Addition of Alkenes (Fig. S2).....      | S26 |
| Proposed mechanism for Dibrominated Substitution of Alkenes (Fig. S3) ..... | S26 |
| NMR spectra .....                                                           | S27 |

### General Information

Unless stated otherwise, all reactions were carried out under air without N<sub>2</sub> protection. All solvents were directly used without any pretreatment. NMR spectras were recorded on a Bruker Avance III 400, or Ascend TM 500 spectrometer and were recorded in ppm ( $\delta$ ) downfield of TMS ( $\delta = 0$ ) in deuterated solvent. Signal splitting patterns are described as singlet (s), doublet (d), triplet (t), quartet (q), quintet (quint), or multiplet (m), with coupling constants (J) in hertz. High-resolution mass spectra (HRMS) were recorded on a BRUKER VPEXII spectrometer with ESI and APCI mode and Thermo Q Exactive GC spectrometer with EI mode unless otherwise stated. The mass spectra (MS) was obtained using a Shimadzu LCMS-2020 mass spectrometer with ESI mode.

### General procedure for the dibromination reaction with olefin.

To a 25ml Schlenk tube was added olefin (**1a-1x**, **3a-3k**, and **5a-5h**) (0.2 mmol) and NBS (88.5 mg, 0.5 mmol) and Mn<sub>2</sub>(CO)<sub>10</sub> (3.9mg, 0.05 eq), then 2 ml DCE was added. The mixture was stirred at 110°C until the olefin was disappeared (monitored by TLC). Then the mixture was filtered through a Celite pad, evaporated the solvent for crude <sup>1</sup>H-NMR (confirmed the dr). The residue was purified by silica gel column chromatography PE/EA (100:1, v/v) to afford product (**2a-2w**, **4a-4k**, and **6a-6h**).

## Characterization data of products.

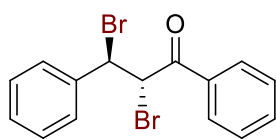

(*trans*)-2,3-dibromo-1,3-diphenylpropan-1-one (**Rac**)-**2a**<sup>s1</sup>

White solid, 91% yield, 18:1 dr, <sup>1</sup>H NMR (400 MHz, CDCl<sub>3</sub>) δ 8.15 – 8.05 (m, 2H), 7.67 (t, *J* = 7.6 Hz, 1H), 7.60 – 7.47 (m, 4H), 7.46 – 7.34 (m, 3H), 5.83 (d, *J* = 11.2 Hz, 1H), 5.65 (d, *J* = 11.2 Hz, 1H). <sup>13</sup>C NMR (100 MHz, CDCl<sub>3</sub>) δ 191.2, 138.3, 134.5, 134.2, 129.3, 129.0, 128.9, 128.9, 128.4, 49.8, 46.9.

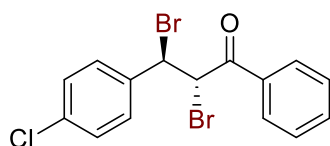

(*trans*)-2,3-dibromo-3-(4-chlorophenyl)-1-phenylpropan-1-one (**Rac**)-**2b**<sup>s2</sup>

White solid, 91% yield, >20:1 dr, <sup>1</sup>H NMR (400 MHz, CDCl<sub>3</sub>) δ 8.10 (dt, *J* = 8.4, 1.6 Hz, 2H), 7.71 – 7.64 (m, 1H), 7.60 – 7.52 (m, 2H), 7.50 – 7.44 (m, 2H), 7.43 – 7.37 (m, 2H), 5.77 (d, *J* = 11.2 Hz, 1H), 5.62 (d, *J* = 11.2 Hz, 1H). <sup>13</sup>C NMR (100 MHz, CDCl<sub>3</sub>) δ 190.9, 136.9, 135.2, 134.3, 134.3, 129.7, 129.2, 129.0, 128.9, 48.7, 46.6.

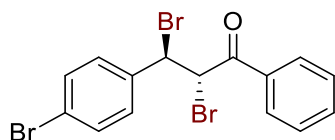

(*trans*)-2,3-dibromo-3-(4-bromophenyl)-1-phenylpropan-1-one (**Rac**)-**2c**<sup>s8</sup>

White solid, 93% yield, >20:1 dr, <sup>1</sup>H NMR (500 MHz, CDCl<sub>3</sub>) δ 8.09 (d, *J* = 7.5 Hz, 2H), 7.67 (t, *J* = 7.5 Hz, 1H), 7.56 (t, *J* = 8.0 Hz, 4H), 7.40 (d, *J* = 8.5 Hz, 2H), 5.76 (d, *J* = 11.5 Hz, 1H), 5.60 (d, *J* = 11.5 Hz, 1H). <sup>13</sup>C NMR (125 MHz, CDCl<sub>3</sub>) δ 190.9, 137.4, 134.3, 134.3, 132.1, 123.0, 129.0, 128.9, 123.3, 48.7, 46.5. HRMS (ESI) *m/z* [M+Na]<sup>+</sup>: Calcd for C<sub>15</sub>H<sub>11</sub>OBr<sub>3</sub>Na: 466.8252. Found: 466.8233.

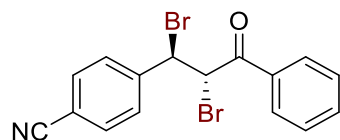

4-((*trans*)-1,2-dibromo-3-oxo-3-phenylpropyl)benzonitrile (**Rac**)-**2d**<sup>s3</sup>

White solid, 95% yield, >20:1 dr, <sup>1</sup>H NMR (400 MHz, CDCl<sub>3</sub>) δ 8.09 (d, *J* = 7.6 Hz, 2H), 7.73 (d, *J* = 8.2 Hz, 2H), 7.69 (t, *J* = 7.6 Hz, 1H), 7.64 (d, *J* = 8.4 Hz, 2H), 7.56 (t, *J* = 7.6 Hz, 2H), 5.75 (d, *J* = 11.2 Hz, 1H), 5.64 (d, *J* = 11.2 Hz, 1H). <sup>13</sup>C NMR (100 MHz, CDCl<sub>3</sub>) δ 190.5, 143.3, 134.5, 134.1, 132.7, 129.2, 129.1, 128.9, 118.2, 113.1, 47.7, 45.9. HRMS (ESI) *m/z* [M+Na]<sup>+</sup>: Calcd for C<sub>16</sub>H<sub>11</sub>Br<sub>2</sub>NO:

413.9100. Found: 413.9119.

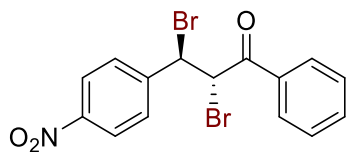

(*trans*)-2,3-dibromo-3-(4-nitrophenyl)-1-phenylpropan-1-one (**Rac**)-**2e**<sup>s3</sup>

White solid, 92% yield, >20:1 dr, <sup>1</sup>H NMR (400 MHz, CDCl<sub>3</sub>) δ 8.30 (d, *J* = 8.4 Hz, 2H), 8.10 (d, *J* = 7.6 Hz, 2H), 7.70 (dd, *J* = 10.8, 8.0 Hz, 3H), 7.57 (t, *J* = 7.6 Hz, 2H), 5.78 (d, *J* = 11.2 Hz, 1H), 5.70 (d, *J* = 11.2 Hz, 1H). <sup>13</sup>C NMR (125 MHz, CDCl<sub>3</sub>) δ 190.4, 148.4, 145.2, 134.5, 134.0, 129.5, 129.1, 129.0, 124.2, 47.2, 45.9.

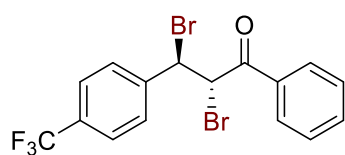

(*trans*)-2,3-dibromo-1-phenyl-3-(4-(trifluoromethyl)phenyl)propan-1-one (**Rac**)-**2f**

White solid, 80% yield, 17:1 dr, <sup>1</sup>H NMR (400 MHz, CDCl<sub>3</sub>) δ 8.12 (d, *J* = 7.2 Hz, 2H), 7.69 (m, 5H), 7.59 (t, *J* = 7.6 Hz, 2H), 5.82 (d, *J* = 11.2 Hz, 1H), 5.69 (d, *J* = 11.2 Hz, 1H). <sup>13</sup>C NMR (100 MHz, CDCl<sub>3</sub>) δ 190.7, 142.2, 134.4, 134.2, 131.3 (d, *J* = 32.7 Hz), 129.1, 128.9, 128.9, 125.9 (q, *J* = 3.5 Hz), 123.8 (q, *J* = 272.3 Hz), 48.1, 46.3. <sup>19</sup>F NMR (375 MHz, CDCl<sub>3</sub>) δ -62.75. HRMS (EI) *m/z* [M-Br]<sup>+</sup>: Calcd for C<sub>16</sub>H<sub>11</sub>OBrF<sub>3</sub>: 354.9939. Found: 354.9938.

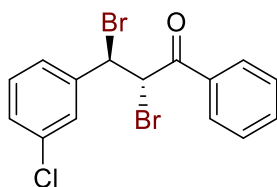

(*trans*)-2,3-dibromo-3-(3-chlorophenyl)-1-phenylpropan-1-one (**Rac**)-**2g**

White solid, 84% yield, 14:1 dr, <sup>1</sup>H NMR (400 MHz, CDCl<sub>3</sub>) δ 8.10 (d, *J* = 8.4 Hz, 2H), 7.68 (t, *J* = 8.0 Hz, 1H), 7.55 (m, 3H), 7.39 (m, 3H), 5.76 (d, *J* = 11.2 Hz, 1H), 5.59 (d, *J* = 11.2 Hz, 1H). <sup>13</sup>C NMR (100 MHz, CDCl<sub>3</sub>) δ 190.9, 140.2, 134.7, 134.3, 134.3, 130.1, 129.5, 129.1, 129.0, 128.5, 126.7, 48.4, 46.5. HRMS (ESI) *m/z* [M+Na]<sup>+</sup>: Calcd for: C<sub>15</sub>H<sub>11</sub>Br<sub>2</sub>ClONa 422.8757. Found: 422.8757.

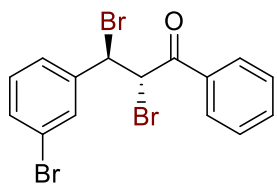

(*trans*)-2,3-dibromo-3-(3-bromophenyl)-1-phenylpropan-1-one (**Rac**)-**2h**

White solid, 91% yield, >20:1 dr,  $^1\text{H}$  NMR (400 MHz,  $\text{CDCl}_3$ )  $\delta$  8.10 (dd,  $J = 8.4, 1.2$  Hz, 2H), 7.68 (m, 2H), 7.57 (d,  $J = 8.0$  Hz, 2H), 7.54 – 7.50 (m, 1H), 7.47 – 7.42 (m, 1H), 7.30 (t,  $J = 8.0$  Hz, 1H), 5.75 (d,  $J = 11.2$  Hz, 1H), 5.57 (d,  $J = 11.2$  Hz, 1H).  $^{13}\text{C}$  NMR (100 MHz,  $\text{CDCl}_3$ )  $\delta$  190.9, 140.5, 134.3, 134.2, 132.4, 131.4, 130.4, 129.1, 129.0, 127.2, 122.8, 48.4, 46.5. HRMS (ESI)  $m/z$   $[\text{M}+\text{Na}]^+$ : Calcd for:  $\text{C}_{15}\text{H}_{11}\text{OBr}_3\text{Na}$  466.8252. Found: 466.8234.

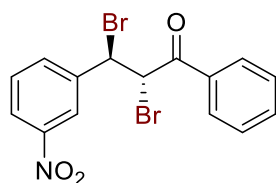

(*trans*)-2,3-dibromo-3-(3-nitrophenyl)-1-phenylpropan-1-one (**Rac**)-2i<sup>s4</sup>

White solid, 97% yield, >20:1 dr,  $^1\text{H}$  NMR (400 MHz,  $\text{CDCl}_3$ )  $\delta$  8.43 (s, 1H), 8.26 (d,  $J = 8.0$  Hz, 1H), 8.12 (d,  $J = 8.0$  Hz, 2H), 7.84 (d,  $J = 7.6$  Hz, 1H), 7.70 (t,  $J = 6.8$  Hz, 1H), 7.60 (dt,  $J = 18.4, 7.6$  Hz, 3H), 5.81 (d,  $J = 11.2$  Hz, 1H), 5.72 (d,  $J = 11.2$  Hz, 1H).  $^{13}\text{C}$  NMR (100 MHz,  $\text{CDCl}_3$ )  $\delta$  190.5, 148.5, 140.6, 134.5, 134.5, 134.1, 129.9, 129.1, 129.0, 124.1, 123.4, 47.5, 46.2. HRMS (ESI)  $m/z$   $[\text{M}+\text{Na}]^+$ : Calcd for:  $\text{C}_{15}\text{H}_{11}\text{NO}_3\text{Br}_2\text{Na}$  433.8998. Found: 433.9007.

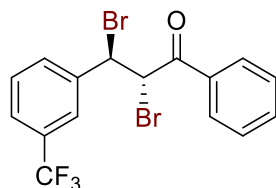

(*trans*)-2,3-dibromo-1-phenyl-3-(3-(trifluoromethyl)phenyl)propan-1-one (**Rac**)-2j

White solid, 85% yield, >20:1 dr,  $^1\text{H}$  NMR (400 MHz,  $\text{CDCl}_3$ )  $\delta$  8.13 (d,  $J = 7.2$  Hz, 2H), 7.81 (s, 1H), 7.76 – 7.65 (m, 3H), 7.59 (t,  $J = 7.6$  Hz, 3H), 5.82 (d,  $J = 11.2$  Hz, 1H), 5.70 (d,  $J = 11.2$  Hz, 1H).  $^{13}\text{C}$  NMR (125 MHz,  $\text{CDCl}_3$ )  $\delta$  190.8, 139.4, 134.4, 134.2, 131.4 (d,  $J = 32.9$  Hz), 131.5, 129.5, 129.1, 129.0, 126.1 (q,  $J = 7.6$  Hz), 125.2 (q,  $J = 7.6$  Hz), 123.7 (d,  $J = 272.7$  Hz). 48.3, 46.4.  $^{19}\text{F}$  NMR (470 MHz,  $\text{CDCl}_3$ )  $\delta$  -62.64. HRMS (EI)  $m/z$   $[\text{M}-\text{Br}]^+$ : Calcd for  $\text{C}_{16}\text{H}_{11}\text{OBrF}_3$ : 354.9939. Found: 354.9940.

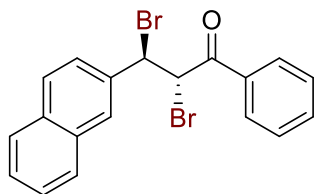

(*trans*)-2,3-dibromo-3-(naphthalen-2-yl)-1-phenylpropan-1-one (**Rac**)-2k<sup>s5</sup>

White solid, 83% yield, 8:1 dr,  $^1\text{H}$  NMR (400 MHz,  $\text{CDCl}_3$ )  $\delta$  8.18 – 8.09 (m, 2H), 7.96 (d,  $J = 1.2$  Hz,

1H), 7.94 (d,  $J = 8.6$  Hz, 1H), 7.92 – 7.83 (m, 2H), 7.71 – 7.62 (m, 2H), 7.55 (m, 4H), 5.96 (d,  $J = 11.2$  Hz, 1H), 5.85 (d,  $J = 11.2$  Hz, 1H).  $^{13}\text{C}$  NMR (100 MHz,  $\text{CDCl}_3$ )  $\delta$  191.2, 135.3, 134.5, 134.3, 133.6, 132.9, 129.1, 129.1, 129.0, 128.3, 128.2, 127.8, 127.1, 126.8, 124.9, 50.4, 46.7. HRMS (ESI)  $m/z$   $[\text{M}+\text{Na}]^+$ : Calcd for:  $\text{C}_{19}\text{H}_{14}\text{Br}_2\text{ONa}$  438.9304. Found: 438.9306.

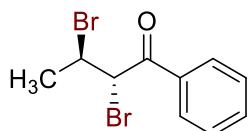

(*trans*)-2,3-dibromo-1-phenylbutan-1-one (**Rac**)-2l<sup>s6</sup>

Colorless oil, 83% yield, 8:1 dr,  $^1\text{H}$  NMR (500 MHz,  $\text{CDCl}_3$ )  $\delta$  8.02 (d,  $J = 7.5$  Hz, 2H), 7.63 (t,  $J = 7.5$  Hz, 1H), 7.52 (t,  $J = 7.5$  Hz, 2H), 5.38 (d,  $J = 10.5$  Hz, 1H), 4.75 (dq,  $J = 10.5, 6.5$  Hz, 1H), 2.03 (d,  $J = 6.5$  Hz, 3H).  $^{13}\text{C}$  NMR (125 MHz,  $\text{CDCl}_3$ )  $\delta$  191.4, 134.3, 134.1, 129.0, 128.9, 49.4, 44.9, 24.4.

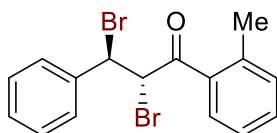

(*trans*)-2,3-dibromo-3-phenyl-1-(*o*-tolyl)propan-1-one (**Rac**)-2m<sup>s7</sup>

White solid, 81% yield, 17:1 dr,  $^1\text{H}$  NMR (400 MHz,  $\text{CDCl}_3$ )  $\delta$  7.88 (d,  $J = 8.0$  Hz, 1H), 7.55 – 7.30 (m, 8H), 5.68 (d,  $J = 11.2$  Hz, 1H), 5.60 (d,  $J = 11.2$  Hz, 1H), 2.58 (s, 3H).  $^{13}\text{C}$  NMR (100 MHz,  $\text{CDCl}_3$ )  $\delta$  192.73, 138.92, 137.08, 134.56, 131.40, 131.12, 128.29, 127.85, 127.32, 127.14, 124.76, 49.25, 48.96, 19.90. HRMS (ESI)  $m/z$   $[\text{M}+\text{Na}]^+$ : Calcd for  $\text{C}_{16}\text{H}_{14}\text{Br}_2\text{ONa}$ : 402.9304. Found: 402.9311.

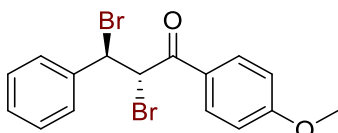

(*trans*)-2,3-dibromo-1-(4-methoxyphenyl)-3-phenylpropan-1-one (**Rac**)-2n<sup>s2</sup>

White solid, 85% yield, 15:1 dr, (5 mmol scale: 84% yield, 12:1 dr)  $^1\text{H}$  NMR (400 MHz,  $\text{CDCl}_3$ )  $\delta$  8.09 (d,  $J = 8.8$  Hz, 2H), 7.60 – 7.50 (m, 2H), 7.47 – 7.32 (m, 3H), 7.02 (d,  $J = 8.8$  Hz, 2H), 5.80 (d,  $J = 12.0$  Hz, 1H), 5.65 (d,  $J = 12.0$  Hz, 1H), 3.91 (s, 3H).  $^{13}\text{C}$  NMR (100 MHz,  $\text{CDCl}_3$ )  $\delta$  189.7, 164.5, 138.5, 131.4, 129.3, 128.9, 128.4, 127.2, 114.3, 55.7, 50.0, 46.8.

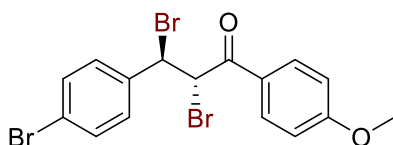

(*trans*)-2,3-dibromo-3-(4-bromophenyl)-1-(4-methoxyphenyl)propan-1-one (**Rac**)-2o

White solid, 87% yield, >20:1 dr,  $^1\text{H}$  NMR (400 MHz,  $\text{CDCl}_3$ )  $\delta$  8.07 (d,  $J = 8.8$  Hz, 2H), 7.55 (d,  $J =$

8.4 Hz, 2H), 7.40 (d,  $J = 8.4$  Hz, 2H), 7.01 (d,  $J = 8.8$  Hz, 2H), 5.73 (d,  $J = 11.2$  Hz, 1H), 5.60 (d,  $J = 11.2$  Hz, 1H), 3.91 (s, 3H).  $^{13}\text{C}$  NMR (100 MHz,  $\text{CDCl}_3$ )  $\delta$  189.33, 164.53, 137.57, 132.06, 131.38, 130.00, 127.08, 123.24, 114.32, 77.33, 77.02, 76.70, 55.66, 48.95, 46.45. HRMS (APCI)  $m/z$   $[\text{M}+\text{H}]^+$ : Calcd for  $\text{C}_{16}\text{H}_{14}\text{Br}_3\text{O}_2$ : 474.8538 Found: 474.8532.

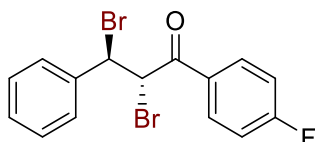

(*trans*)-2,3-dibromo-1-(4-fluorophenyl)-3-phenylpropan-1-one (**Rac**)-2p<sup>s8</sup>

White solid,  $^1\text{H}$  NMR (500 MHz,  $\text{CDCl}_3$ )  $\delta$  8.14 (dd,  $J = 8.8, 5.0$  Hz, 2H), 7.52 (d,  $J = 7.5$  Hz, 2H), 7.44 (dd,  $J = 11.0, 4.5$  Hz, 2H), 7.39 (ddd,  $J = 7.0, 3.5, 1.0$  Hz, 1H), 7.26 – 7.19 (m, 2H), 5.78 (dd,  $J = 11.0, 2.0$  Hz, 1H), 5.63 (d,  $J = 11.0$  Hz, 1H).  $^{13}\text{C}$  NMR (125 MHz,  $\text{CDCl}_3$ )  $\delta$  189.7, 166.4 (d,  $J = 257.2$  Hz), 138.1, 131.7 (d,  $J = 9.6$  Hz), 130.8 (d,  $J = 3.0$  Hz), 129.4, 128.9, 128.4, 116.3 (d,  $J = 22.1$  Hz), 49.7, 46.8.  $^{19}\text{F}$  NMR (470 MHz,  $\text{CDCl}_3$ )  $\delta$  -102.76.

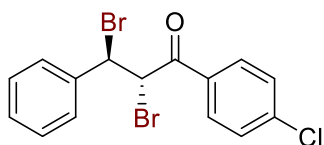

(*trans*)-2,3-dibromo-1-(4-chlorophenyl)-3-phenylpropan-1-one (**Rac**)-2q<sup>s2</sup>

White solid, 92% yield, >20:1 dr,  $^1\text{H}$  NMR (500 MHz,  $\text{CDCl}_3$ )  $\delta$  8.04 (d,  $J = 8.5$  Hz, 2H), 7.52 (dd,  $J = 8.0, 4.0$  Hz, 4H), 7.48 – 7.32 (m, 3H), 5.76 (d,  $J = 11.0$  Hz, 1H), 5.63 (d,  $J = 11.0$  Hz, 1H).  $^{13}\text{C}$  NMR (125 MHz,  $\text{CDCl}_3$ )  $\delta$  190.1, 140.8, 138.0, 132.7, 130.3, 129.4, 128.9, 128.3, 49.7, 46.8.

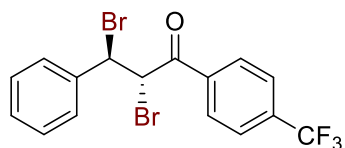

(*trans*)-2,3-dibromo-3-phenyl-1-(4-(trifluoromethyl)phenyl)propan-1-one (**Rac**)-2r

White solid, 86% yield, 15:1 dr,  $^1\text{H}$  NMR (400 MHz,  $\text{CDCl}_3$ )  $\delta$  8.21 (d,  $J = 8.0$  Hz, 2H), 7.82 (d,  $J = 8.0$  Hz, 2H), 7.59 – 7.49 (m, 2H), 7.48 – 7.36 (m, 3H), 5.79 (d,  $J = 11.2$  Hz, 1H), 5.63 (d,  $J = 11.2$  Hz, 1H).  $^{13}\text{C}$  NMR (100 MHz,  $\text{CDCl}_3$ )  $\delta$  190.3, 137.8, 137.2, 135.3 (q,  $J = 32.6$  Hz), 129.5, 129.3, 129.0, 128.3, 126.1 (q,  $J = 3.5$  Hz), 123.4 (q,  $J = 272.9$  Hz), 49.5, 46.9.  $^{19}\text{F}$  NMR (375 MHz,  $\text{CDCl}_3$ )  $\delta$  -63.25. HRMS (EI)  $m/z$   $[\text{M}-\text{Br}]^+$ : Calcd for  $\text{C}_{16}\text{H}_{11}\text{OBrF}_3$ : 354.9939. Found: 354.9938.

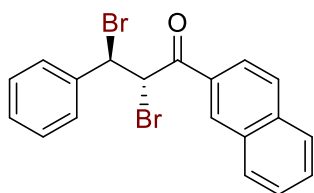

(*trans*)-2,3-dibromo-1-(naphthalen-2-yl)-3-phenylpropan-1-one (**Rac**)-2s<sup>s9</sup>

White solid, 83% yield, 10:1 dr, <sup>1</sup>H NMR (500 MHz, CDCl<sub>3</sub>) δ 8.63 (s, 1H), 8.14 (d, *J* = 8.4 Hz, 1H), 8.04 (d, *J* = 8.0 Hz, 1H), 7.98 (d, *J* = 8.4 Hz, 1H), 7.92 (d, *J* = 8.0 Hz, 1H), 7.66 (t, *J* = 7.2 Hz, 1H), 7.60 (dd, *J* = 15.2, 7.2 Hz, 3H), 7.45 (t, *J* = 7.2 Hz, 2H), 7.40 (t, *J* = 7.2 Hz, 1H), 6.00 (d, *J* = 11.2 Hz, 1H), 5.71 (d, *J* = 11.2 Hz, 1H). <sup>13</sup>C NMR (100 MHz, CDCl<sub>3</sub>) δ 191.2, 138.3, 136.1, 132.5, 131.8, 130.8, 129.9, 129.4, 129.2, 129.1, 128.9, 128.5, 127.9, 127.2, 124.2, 50.0, 47.0.

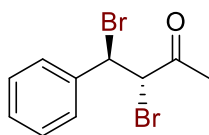

(*trans*)-3,4-dibromo-4-phenylbutan-2-one (**Rac**)-2t<sup>s1</sup>

White solid, 92% yield, >20:1 dr, <sup>1</sup>H NMR (500 MHz, CDCl<sub>3</sub>) δ 7.46 – 7.30 (m, 5H), 5.32 (d, *J* = 11.5 Hz, 1H), 4.93 (d, *J* = 11.5 Hz, 1H), 2.49 (s, 3H). <sup>13</sup>C NMR (125 MHz, CDCl<sub>3</sub>) δ 198.5, 137.8, 129.4, 128.9, 128.1, 52.8, 49.5, 27.0.

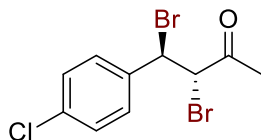

(*trans*)-3,4-dibromo-4-(4-chlorophenyl)butan-2-one (**Rac**)-2u<sup>s16</sup>

White solid, 94% yield, >20:1 dr, <sup>1</sup>H NMR (400 MHz, CDCl<sub>3</sub>) δ 7.38 (d, *J* = 8.8 Hz, 2H), 7.35 (d, *J* = 8.8 Hz, 2H), 5.29 (d, *J* = 11.2 Hz, 1H), 4.87 (d, *J* = 11.2 Hz, 1H), 2.48 (s, 3H). <sup>13</sup>C NMR (125 MHz, CDCl<sub>3</sub>) δ 198.1, 136.4, 135.2, 129.5, 129.2, 52.4, 48.4, 27.2.

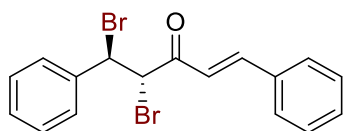

(*trans,E*)-4,5-dibromo-1,5-diphenylpent-1-en-3-one (**Rac**)-2v<sup>s10</sup>

White solid, 85% yield, >20:1 dr, <sup>1</sup>H NMR (500 MHz, CDCl<sub>3</sub>) δ 7.87 (d, *J* = 15.5 Hz, 1H), 7.65 (d, *J* = 7.0 Hz, 2H), 7.50 – 7.35 (m, 9H), 6.98 (d, *J* = 15.5 Hz, 1H), 5.50 (d, *J* = 11.5 Hz, 1H), 5.23 (d, *J* = 11.5 Hz, 1H). <sup>13</sup>C NMR (125 MHz, CDCl<sub>3</sub>) δ 189.9, 146.1, 138.2, 134.0, 131.3, 129.3, 129.1, 128.9, 128.8, 128.3, 122.1, 51.6, 49.5. HRMS (ESI) *m/z* [M+Na]<sup>+</sup>: Calcd for: C<sub>17</sub>H<sub>14</sub>OBr<sub>2</sub>Na 414.9304. Found: 414.9302.



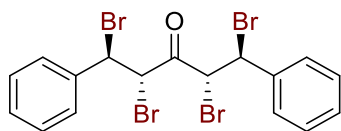

(*trans,trans*)-1,2,4,5-tetrabromo-1,5-diphenylpentan-3-one (**Rac**)-2w

White solid, 83% yield, >20:1 dr,  $^1\text{H}$  NMR (400 MHz,  $\text{CDCl}_3$ )  $\delta$  7.50 – 7.36 (m, 10H), 5.52 (d,  $J = 11.2$  Hz, 2H), 5.40 (d,  $J = 11.2$  Hz, 2H).  $^{13}\text{C}$  NMR (100 MHz,  $\text{CDCl}_3$ )  $\delta$  187.7, 138.3, 129.3, 128.9, 128.2, 50.2, 47.4. HRMS (ESI)  $m/z$   $[\text{M}+\text{Na}]^+$ : Calcd for:  $\text{C}_{17}\text{H}_{14}\text{OBr}_4\text{Na}$  572.7670. Found: 572.7659.

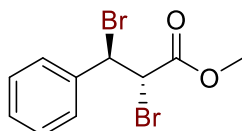

methyl (*trans*)-2,3-dibromo-3-phenylpropanoate (**Rac**)-4a<sup>s1</sup>

White solid, 89% yield, 17:1 dr,  $^1\text{H}$  NMR (500 MHz,  $\text{CDCl}_3$ )  $\delta$  7.50 – 7.30 (m, 5H), 5.34 (d,  $J = 11.5$  Hz, 1H), 4.85 (d,  $J = 11.5$  Hz, 1H), 3.90 (s, 3H).  $^{13}\text{C}$  NMR (125 MHz,  $\text{CDCl}_3$ )  $\delta$  168.4, 137.6, 129.4, 128.9, 128.1, 53.5, 50.6, 46.7.

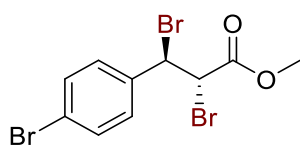

methyl (*trans*)-2,3-dibromo-3-(4-bromophenyl)propanoate (**Rac**)-4b<sup>s1</sup>

White solid, 94% yield, 19:1 dr,  $^1\text{H}$  NMR (400 MHz,  $\text{CDCl}_3$ )  $\delta$  7.53 (d,  $J = 8.4$  Hz, 2H), 7.32 – 7.25 (d,  $J = 8.4$  Hz, 2H), 5.29 (d,  $J = 11.6$  Hz, 1H), 4.78 (d,  $J = 11.6$  Hz, 1H), 3.90 (s, 3H).  $^{13}\text{C}$  NMR (100 MHz,  $\text{CDCl}_3$ )  $\delta$  168.1, 136.7, 132.2, 129.7, 123.5, 53.5, 49.6, 46.4.

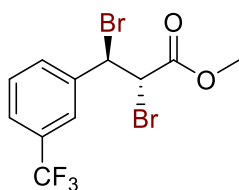

methyl (*trans*)-2,3-dibromo-3-(3-(trifluoromethyl)phenyl)propanoate (**Rac**)-4c

Colorless oil, 85% yield, >20:1 dr,  $^1\text{H}$  NMR (400 MHz,  $\text{CDCl}_3$ )  $\delta$  7.66 (s, 1H), 7.63 (d,  $J = 8.0$  Hz, 1H), 7.60 (d,  $J = 8.0$  Hz, 1H), 7.53 (t,  $J = 8.0$  Hz, 1H), 5.37 (d,  $J = 11.6$  Hz, 1H), 4.82 (d,  $J = 11.6$  Hz, 1H), 3.91 (s, 3H).  $^{13}\text{C}$  NMR (100 MHz,  $\text{CDCl}_3$ )  $\delta$  168.1, 138.7, 131.4, 131.4 (q,  $J = 32.8$  Hz), 129.6, 126.2 (q,  $J = 3.6$  Hz), 125.0 (q,  $J = 3.8$  Hz), 123.7 (q,  $J = 270.1$  Hz), 53.6, 49.1, 46.3.  $^{19}\text{F}$  NMR (375 MHz,  $\text{CDCl}_3$ )  $\delta$  -62.77. HRMS (EI)  $m/z$   $[\text{M}-\text{F}]^+$ : Calcd for  $\text{C}_{11}\text{H}_9\text{O}_2\text{Br}_2\text{F}_2$ : 368.8931. Found: 368.8932. HRMS (EI)  $m/z$   $[\text{M}-\text{Br}]^+$ : Calcd for  $\text{C}_{11}\text{H}_9\text{O}_2\text{Br}_2\text{F}_2$ : 308.9732. Found: 308.9734.

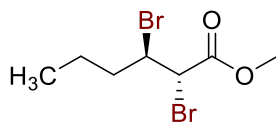

methyl (*trans*)-2,3-dibromohexanoate **(Rac)-4d**

Colorless oil, 73% yield, 12:1 dr,  $^1\text{H NMR}$  (400 MHz,  $\text{CDCl}_3$ )  $\delta$  4.42 (m, 2H), 3.83 (s, 3H), 2.21 (m, 1H), 1.81 (m, 1H), 1.63 (m, 1H), 1.51 (m, 1H), 1.04 (t,  $J = 7.2$  Hz, 3H).  $^{13}\text{C NMR}$  (100 MHz,  $\text{CDCl}_3$ )  $\delta$  168.4, 53.2, 52.5, 47.7, 37.1, 19.7, 13.3. HRMS (ESI)  $m/z$   $[\text{M}+\text{Na}]^+$ : Calcd for  $\text{C}_7\text{H}_{12}\text{Br}_2\text{O}_2\text{Na}$ : 308.9096. Found: 308.9082.

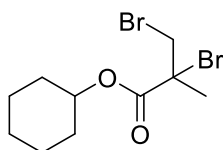

cyclohexyl 2,3-dibromo-2-methylpropanoate **(Rac)-4e**

Colorless oil, 89% yield,  $^1\text{H NMR}$  (500 MHz,  $\text{CDCl}_3$ )  $\delta$  5.02 – 4.83 (m, 1H), 4.24 (d,  $J = 9.5$  Hz, 1H), 3.73 (d,  $J = 9.5$  Hz, 1H), 2.03 (s, 3H), 1.85 (m, 2H), 1.75 (m, 2H), 1.60 – 1.49 (m, 3H), 1.40 (m, 3H).  $^{13}\text{C NMR}$  (125 MHz,  $\text{CDCl}_3$ )  $\delta$  167.9, 74.8, 56.0, 38.3, 30.9, 26.3, 25.3, 23.3. HRMS (ESI)  $m/z$   $[\text{M}+\text{Na}]^+$ : Calcd for  $\text{C}_{10}\text{H}_{16}\text{O}_2\text{Br}_2\text{Na}$ : 348.9409. Found: 348.9403.

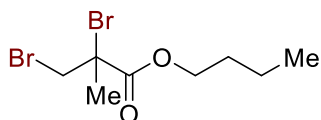

butyl 2,3-dibromo-2-methylpropanoate **(Rac)-4f**

$^1\text{H NMR}$  (400 MHz,  $\text{CDCl}_3$ )  $\delta$  4.25 (dt,  $J = 6.4, 2.4$  Hz, 3H), 3.75 (d,  $J = 9.8$  Hz, 1H), 2.05 (s, 3H), 1.70 (dt,  $J = 13.2, 6.4$  Hz, 2H), 1.46 (dq,  $J = 14.8, 7.2$  Hz, 2H), 0.97 (t,  $J = 7.2$  Hz, 3H).  $^{13}\text{C NMR}$  (101 MHz,  $\text{CDCl}_3$ )  $\delta$  168.7, 66.4, 55.6, 38.3, 30.4, 26.4, 19.1, 13.7.

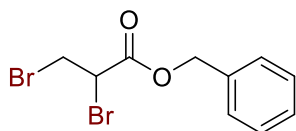

benzyl 2,3-dibromopropanoate **(Rac)-4g<sup>s1</sup>**

Colorless oil, 89% yield,  $^1\text{H NMR}$  (400 MHz,  $\text{CDCl}_3$ )  $\delta$  7.41 – 7.35 (m, 5H), 5.26 (s, 2H), 4.48 (dd,  $J = 11.2, 4.4$  Hz, 1H), 3.94 (dd,  $J = 11.2, 9.6$  Hz, 1H), 3.68 (dd,  $J = 9.6, 4.4$  Hz, 1H).  $^{13}\text{C NMR}$  (100 MHz,  $\text{CDCl}_3$ )  $\delta$  167.4, 134.7, 128.7, 128.3, 128.3, 68.2, 41.0, 29.6.

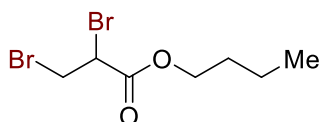

butyl 2,3-dibromopropanoate (**Rac**)-4h<sup>17</sup>

<sup>1</sup>H NMR (400 MHz, CDCl<sub>3</sub>) δ 4.45 (dd, *J* = 11.2, 4.4 Hz, 1H), 4.26 (t, *J* = 6.4 Hz, 2H), 3.94 (dd, *J* = 11.2, 9.6 Hz, 1H), 3.69 (dd, *J* = 9.8, 4.4 Hz, 1H), 1.74 – 1.64 (m, 2H), 1.51 – 1.38 (m, 2H), 0.97 (t, *J* = 7.4 Hz, 3H). <sup>13</sup>C NMR (126 MHz, CDCl<sub>3</sub>) δ 167.5, 66.3, 41.2, 30.4, 29.7, 18.9, 13.6, 13.6.

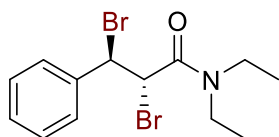

(*trans*)-2,3-dibromo-*N,N*-diethyl-3-phenylpropanamide (**Rac**)-4i

White solid, 88% yield, 14:1 dr, <sup>1</sup>H NMR (400 MHz, CDCl<sub>3</sub>) δ 7.45 (dd, *J* = 8.0, 1.6 Hz, 2H), 7.42 – 7.31 (m, 3H), 5.61 (d, *J* = 11.2 Hz, 1H), 5.04 (d, *J* = 11.2 Hz, 1H), 3.65 – 3.50 (m, 2H), 3.44 (tt, *J* = 14.8, 7.2 Hz, 2H), 1.41 (t, *J* = 7.2 Hz, 3H), 1.26 – 1.16 (m, 3H). <sup>13</sup>C NMR (100 MHz, CDCl<sub>3</sub>) δ 166.3, 138.5, 129.2, 128.8, 128.3, 77.3, 77.0, 76.7, 52.2, 44.9, 42.7, 41.8, 14.7, 12.4. HRMS (ESI) *m/z* [M+Na]<sup>+</sup>: Calcd for C<sub>13</sub>H<sub>17</sub>NOBr<sub>2</sub>Na: 383.9569. Found: 383.9565.

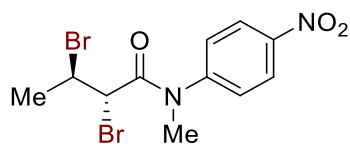

(*trans*)-2,3-dibromo-*N*-methyl-*N*-(4-nitrophenyl)butanamide (**Rac**)-4j

White solid, 87% yield, 13:1 dr, <sup>1</sup>H NMR (400 MHz, CDCl<sub>3</sub>) δ 8.37 (d, *J* = 8.4 Hz, 2H), 7.58 (d, *J* = 8.4 Hz, 2H), 4.64 (dq, *J* = 13.2, 6.4 Hz, 1H), 4.18 (d, *J* = 10.8 Hz, 1H), 3.37 (s, 3H), 1.79 (d, *J* = 6.4 Hz, 3H). <sup>13</sup>C NMR (125 MHz, CDCl<sub>3</sub>) δ 166.8, 148.2, 147.4, 128.6, 125.6, 47.4, 47.1, 38.1, 23.8. HRMS (ESI) *m/z* [M+Na]<sup>+</sup>: Calcd for: C<sub>11</sub>H<sub>12</sub>N<sub>2</sub>O<sub>3</sub>Br<sub>2</sub>Na 400.9107. Found: 400.9108.

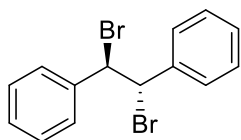

(*trans*)-1,2-dibromo-1,2-diphenylethane (**Rac**)-4k<sup>s1</sup>

White solid, 87% yield, >20:1 dr (*trans*-stilbene used); 91% yield, >20:1 dr (*cis*-stilbene used), <sup>1</sup>H NMR (400 MHz, DMSO) δ 7.70 (d, *J* = 7.2 Hz, 4H), 7.43 (t, *J* = 7.2 Hz, 4H), 7.36 (t, *J* = 7.2 Hz, 2H), 6.15 (s, 2H). <sup>13</sup>C NMR (100 MHz, DMSO) δ 141.2, 129.2, 129.0, 128.6, 56.2.

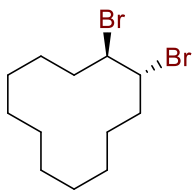

(trans)-1,2-dibromocyclododecane **(Rac)-4l**<sup>S15</sup>

<sup>1</sup>H NMR (400 MHz, CDCl<sub>3</sub>) δ 4.42 – 4.29 (m, 2H), 2.24 – 2.12 (m, 2H), 1.98 (m, 2H), 1.64 – 1.55 (m, 2H), 1.53 – 1.44 (m, 2H), 1.43 – 1.27 (m, 12H). <sup>13</sup>C NMR (101 MHz, CDCl<sub>3</sub>) δ 56.0, 36.2, 24.7, 23.4, 23.2, 22.6.

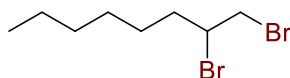

succinimide **(Rac)-4m**<sup>S15</sup>

<sup>1</sup>H NMR (500 MHz, CDCl<sub>3</sub>) δ 4.17 (ddd, *J* = 13.5, 9.5, 4.0 Hz, 1H), 3.85 (dd, *J* = 10.0, 4.5 Hz, 1H), 3.63 (t, *J* = 10.0 Hz, 1H), 2.23 – 2.04 (m, 1H), 1.78 (dtd, *J* = 14.5, 9.5, 4.5 Hz, 1H), 1.65 – 1.52 (m, 1H), 1.50 – 1.38 (m, 1H), 1.39 – 1.23 (m, 6H), 0.90 (t, *J* = 6.5 Hz, 3H). <sup>13</sup>C NMR (126 MHz, CDCl<sub>3</sub>) δ 53.2, 36.4, 36.1, 31.6, 28.5, 26.7, 22.6, 14.1.

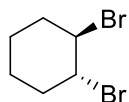

(trans)-1,2-dibromocyclohexane **(Rac)-4n**<sup>S1</sup>

Colorless oil, 83% yield, >20:1 dr, <sup>1</sup>H NMR (400 MHz, CDCl<sub>3</sub>) δ 4.45 (s, 2H), 2.50 – 2.40 (m, 2H), 1.95 – 1.77 (m, 4H), 1.56 – 1.45 (m, 2H). <sup>13</sup>C NMR (100 MHz, CDCl<sub>3</sub>) δ 55.2, 32.0, 22.4.

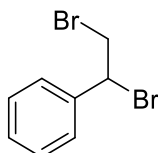

(1,2-dibromoethyl)benzene **(Rac)-4o**<sup>S1</sup>

White solid, 85% yield, <sup>1</sup>H NMR (400 MHz, CDCl<sub>3</sub>) δ 7.44 – 7.31 (m, 5H), 5.15 (dd, *J* = 10.4, 5.6 Hz, 1H), 4.15 – 3.97 (m, 2H). <sup>13</sup>C NMR (100 MHz, CDCl<sub>3</sub>) δ 138.6, 129.2, 128.9, 127.7, 50.9, 35.0.

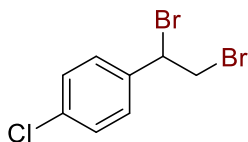

1-chloro-4-(1,2-dibromoethyl)benzene **(Rac)-4p**<sup>S15</sup>

<sup>1</sup>H NMR (400 MHz, CDCl<sub>3</sub>) δ 7.49 – 7.28 (m, 4H), 5.14 (dd, *J* = 11.0, 5.1 Hz, 1H), 4.14 – 3.93 (m, 2H). <sup>13</sup>C NMR (101 MHz, CDCl<sub>3</sub>) δ 137.2, 135.0, 129.1, 129.1, 49.6, 34.7.

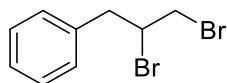

(2,3-dibromopropyl)benzene **(Rac)-4q**<sup>S15</sup>

$^1\text{H}$  NMR (400 MHz,  $\text{CDCl}_3$ )  $\delta$  7.42 – 7.29 (m, 5H), 4.39 (tt,  $J = 8.8, 4.4$  Hz, 1H), 3.85 (dd,  $J = 10.4, 4.4$  Hz, 1H), 3.73 – 3.61 (m, 1H), 3.53 (dd,  $J = 14.4, 4.8$  Hz, 1H), 3.16 (dd,  $J = 14.4, 8.0$  Hz, 1H).  $^{13}\text{C}$  NMR (101 MHz,  $\text{CDCl}_3$ )  $\delta$  136.9, 129.5, 128.5, 127.2, 52.5, 42.0, 36.1.

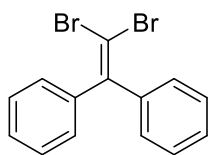

(2,2-dibromoethene-1,1-diyl)dibenzene **6a**<sup>s15</sup>

White solid, 95% yield,  $^1\text{H}$  NMR (400 MHz,  $\text{CDCl}_3$ )  $\delta$  7.46 – 7.26 (m, 10H).  $^{13}\text{C}$  NMR (100 MHz,  $\text{CDCl}_3$ )  $\delta$  147.9, 141.4, 128.8, 128.4, 128.0, 90.3.

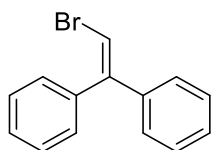

(2-bromoethene-1,1-diyl)dibenzene **6b**<sup>s15</sup>

White solid, 99% yield,  $^1\text{H}$  NMR (400 MHz,  $\text{CDCl}_3$ )  $\delta$  7.43 – 7.27 (m, 8H), 7.23 – 7.16 (m, 2H), 6.76 (s, 1H).  $^{13}\text{C}$  NMR (100 MHz,  $\text{CDCl}_3$ )  $\delta$  146.9, 140.8, 139.2, 129.7, 128.5, 128.3, 128.2, 128.1, 127.7, 105.3.

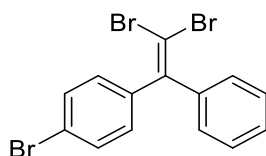

1-bromo-4-(2,2-dibromo-1-phenylvinyl)benzene **6c**

White solid, 82% yield,  $^1\text{H}$  NMR (500 MHz,  $\text{CDCl}_3$ )  $\delta$  7.46 (d,  $J = 8.5$  Hz, 2H), 7.38 – 7.30 (m, 3H), 7.27 (d,  $J = 7.5$  Hz, 2H), 7.18 (d,  $J = 8.5$  Hz, 2H).  $^{13}\text{C}$  NMR (125 MHz,  $\text{CDCl}_3$ )  $\delta$  146.7, 140.9, 140.2, 131.6, 130.5, 128.8, 128.5, 128.2, 122.2, 90.8.

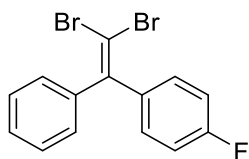

1-(2,2-dibromo-1-phenylvinyl)-4-fluorobenzene **6d**<sup>s11</sup>

Colorless oil, 85% yield,  $^1\text{H}$  NMR (500 MHz,  $\text{CDCl}_3$ )  $\delta$  7.31 (m, 7H), 7.02 (t,  $J = 8.5$  Hz, 2H).  $^{13}\text{C}$  NMR (125 MHz,  $\text{CDCl}_3$ )  $\delta$  162.2 (d,  $J = 248.3$  Hz), 146.8, 141.2, 137.2 (d,  $J = 3.5$  Hz), 130.7 (d,  $J = 8.2$  Hz), 128.8, 128.4, 128.1, 115.5, 90.6.  $^{19}\text{F}$  NMR (375 MHz,  $\text{CDCl}_3$ )  $\delta$  -113.09.

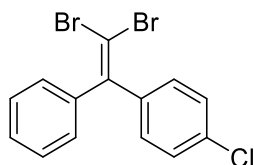

1-chloro-4-(2,2-dibromo-1-phenylvinyl)benzene **6e**

White solid, 88% yield,  $^1\text{H NMR}$  (400 MHz,  $\text{CDCl}_3$ )  $\delta$  7.39 – 7.21 (m, 9H).  $^{13}\text{C NMR}$  (100 MHz,  $\text{CDCl}_3$ )  $\delta$  146.6, 141.0, 139.7, 134.0, 130.2, 128.8, 128.6, 128.4, 128.2, 90.8. HRMS (EI)  $m/z$   $[\text{M}]^{+}$ : Calcd for  $\text{C}_{14}\text{H}_9\text{Br}_2\text{Cl}$ : 369.8754. Found: 369.8756.

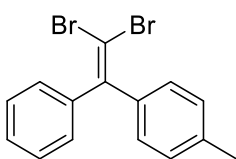

1-(2,2-dibromo-1-phenylvinyl)-4-methylbenzene **6f**

White solid, 60% yield,  $^1\text{H NMR}$  (500 MHz,  $\text{CDCl}_3$ )  $\delta$  7.35 – 7.26 (m, 5H), 7.19 (d,  $J = 7.5$  Hz, 2H), 7.14 (d,  $J = 7.5$  Hz, 2H), 2.33 (s, 3H).  $^{13}\text{C NMR}$  (100 MHz,  $\text{CDCl}_3$ )  $\delta$  147.8, 141.6, 138.5, 137.9, 129.0, 128.8, 128.7, 128.3, 127.9, 89.8, 21.3. HRMS (EI)  $m/z$   $[\text{M}]^{+}$ : Calcd for  $\text{C}_{15}\text{H}_{12}\text{Br}_2$ : 349.9300. Found: 349.9300.

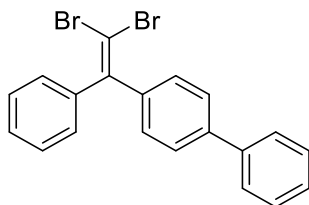

4-(2,2-dibromo-1-phenylvinyl)-1,1'-biphenyl **6g**<sup>s12</sup>

White solid, 90% yield,  $^1\text{H NMR}$  (400 MHz,  $\text{CDCl}_3$ )  $\delta$  7.61 – 7.53 (m, 4H), 7.43 (t,  $J = 7.6$  Hz, 2H), 7.40 – 7.28 (m, 8H).  $^{13}\text{C NMR}$  (100 MHz,  $\text{CDCl}_3$ )  $\delta$  147.5, 141.5, 140.8, 140.4, 140.2, 129.3, 128.8, 128.8, 128.4, 128.1, 127.6, 127.1, 127.0, 90.3.

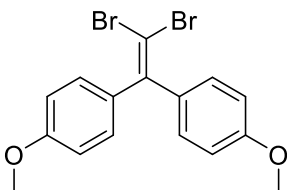

4,4'-(2,2-dibromoethene-1,1-diyl)bis(methoxybenzene) **6h**<sup>s13</sup>

White solid, 87%,  $^1\text{H NMR}$  (500 MHz,  $\text{CDCl}_3$ )  $\delta$  7.21 (d,  $J = 8.0$  Hz, 4H), 6.85 (d,  $J = 8.0$  Hz, 4H),

3.80 (s, 6H).  $^{13}\text{C}$  NMR (125 MHz,  $\text{CDCl}_3$ )  $\delta$  159.2, 147.0, 133.9, 130.4, 113.6, 88.5, 55.3. HRMS (EI)

$m/z$   $[\text{M}]^{+}$ : Calcd for  $\text{C}_{16}\text{H}_{14}\text{O}_2\text{Br}_2$ : 395.9355. Found: 395.9354.

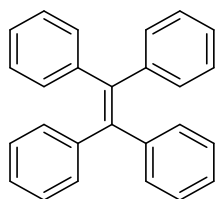

1,1,2,2-tetraphenylethene **7a**<sup>s14</sup>

Light yellow solid, 85%,  $^1\text{H}$  NMR (400 MHz,  $\text{CDCl}_3$ )  $\delta$  7.18 – 7.11 (m, 12H), 7.08 (dd,  $J = 7.2, 2.4$  Hz, 8H).  $^{13}\text{C}$  NMR (125 MHz,  $\text{CDCl}_3$ )  $\delta$  143.7, 140.9, 131.3, 127.6, 126.3.

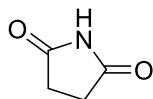

succinimide

$^1\text{H}$  NMR (400 MHz,  $\text{CDCl}_3$ )  $\delta$  8.57 (s, 1H), 2.77 (s, 4H).  $^{13}\text{C}$  NMR (101 MHz,  $\text{CDCl}_3$ )  $\delta$  177.6, 29.6.

## Reference

- s1: G. Hernández-Torres, B. Tan and C. F. Barbas III, *Org. Lett.* 2012, **14**, 1858-1861.
- s2: S. Nakamatsu, S. Toyota, W. Jones and F. Toda, *Chem. Commun.* 2005, 3808–3810.
- s3: G-W. Wang, and J. Gao, *Green Chem.* 2012, **14**, 1125-1131.
- s4: N. O. Mahmoodi, H. K. Yazdanbakhsh and B. Sharifzadeh, *J. Chin. Chem. Soc.* 2007, **54**, 635-641.
- s5: Brindaban C. R. and J. Ranjan, *J. Org. Chem.* 2005, **70**, 8621–8624.
- s6: D. Y. Moon, S. An and B. S. Park, *Tetrahedron*, 2019, **75**, 130684.
- s7: R. L. N. Harris and J. L. Huppatz, *Aust. J. Org. Chem.*, 1977, **30**, 2225-2240.
- s8: F. G. Weber and R. Iindiglia, *J. prakt. Chem.*, 1979, **321**, 935-945.
- s9: A. Khazaei, M. A. Zolfigol, E. Kolvari, N. oukabi, H. oltani, L. S. Bayani, *Synth. Commun.*, 2010, **40**, 2954.
- s10: B. Paul, B. Bhuyan, D. D. Purkayastha, S. S. Dhar and B. K. Patel, *Tetrahedron Lett.*, 2015, **56**, 5646-5650.
- s11: H. Zhang, Y. Nie, J. L. Miao, D. Q. Zhang, Y. X. Li, G. N. Liu, G. X. Sun and X. C. Jiang, *J. Mater. Chem. C*, 2019, **7**, 3306 -3314.
- s12: M. Shimizu, I. Nagao, S. Kiyomoto, and T. Hiyama, *Aust. J. Chem.*, 2012, **65**, 1277-1284.
- s13: M. Zhang, J. Li, L. Yu, X. Wang and M. Bai, *RSC Adv.*, 2020, **10**, 14520.
- s14: J. Luo, Z. Xie, J. W. Y. Lam, L. Cheng, H. Chen, C. Qiu, H. S. Kwok, X. Zhan, Y. Liu, D. Zhu and B. Z. Tang, *Chem. Commun.*, 2001, 1740-1741.
- s15: Y. Yuan, A. Yao, Y. Zheng, M. Gao, Z. Zhou, J. Qiao, J. Hu, B. Ye, J. Zhao, H. Wen, and A. Lei, *iScience*, 2019, **12**, 293-303.
- s16: J. Hamelin, A. Saoudi, H. Benhaoua, *Synthesis*, 2003, **14**, 2185-2188.
- s17 M. Adrian, L. Jānis, D. Liang, G. Silvia, G. Marina, L. Gerard and P. Virgil, *Polym. Chem.*, 2018, **9**, 2082.



## Optimization of the Reaction Conditions

Table S1. Optimization of catalysts.<sup>a</sup>

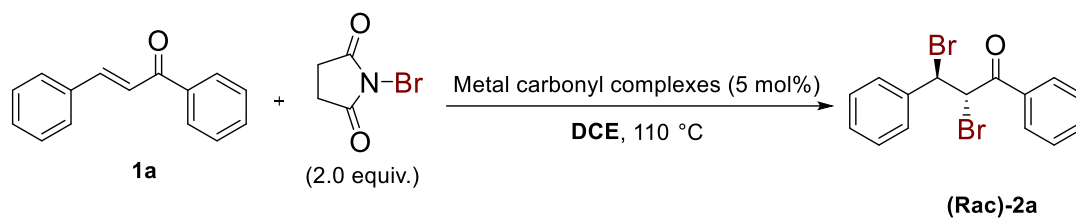

| Entry | Metal carbonyl complexes             | Yield% <sup>a</sup> | dr <sup>b</sup> |
|-------|--------------------------------------|---------------------|-----------------|
| 1     | Mn <sub>2</sub> (CO) <sub>8</sub> Br | 71                  | 10:1            |
| 2     | Re <sub>2</sub> (CO) <sub>10</sub>   | 58                  | 5:1             |
| 3     | Ru <sub>3</sub> (CO) <sub>12</sub>   | 49                  | 6:1             |
| 4     | Mn(CO) <sub>5</sub> Br               | 66                  | 14:1            |
| 5     | CpMn(CO) <sub>3</sub>                | 28                  | -               |
| 6     | Co <sub>2</sub> (CO) <sub>8</sub>    | 63                  | 12:1            |
| 7     | Mn <sub>2</sub> (CO) <sub>10</sub>   | 78                  | 18:1            |

<sup>a</sup>Reaction conditions: 1a (0.2 mmol), NBS (0.4 mmol), catalyst (5 mol%), 110 °C, solvent (1 ml), air.

<sup>b</sup>Isolated yield. <sup>c</sup>The dr was determined by crude NMR spectra.

## The Single Crystal X-ray Diffraction Study of **2o**

To ascertain the structural correctness of these products, a crystallizing form of **2o** was obtained and the structure was undisputedly confirmed by single crystal X-ray analysis.

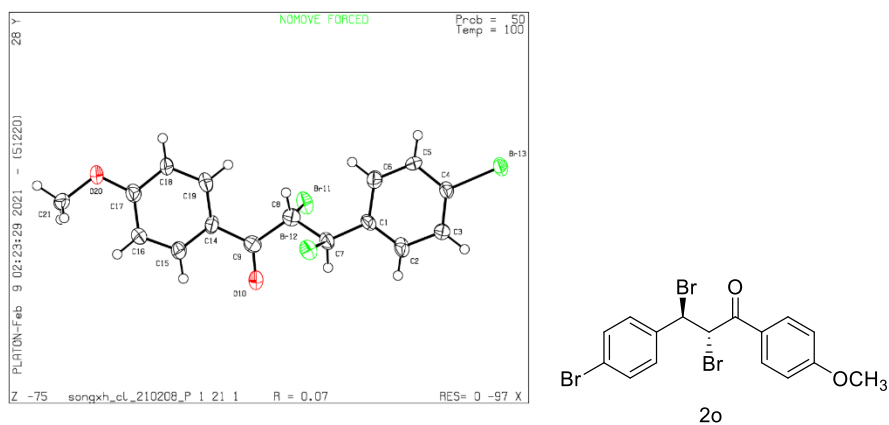

Fig. S1 X-ray single crystal structure of **2o**, CCDC: 2082644.

|                                    |                                                                |
|------------------------------------|----------------------------------------------------------------|
| Empirical formula                  | C <sub>16</sub> H <sub>13</sub> Br <sub>3</sub> O <sub>2</sub> |
| Formula weight                     | 476.99                                                         |
| Temperature/K                      | 100.00(10)                                                     |
| Crystal system                     | monoclinic                                                     |
| Space group                        | P2 <sub>1</sub>                                                |
| a/Å                                | 5.5472(2)                                                      |
| b/Å                                | 7.8195(4)                                                      |
| c/Å                                | 18.3327(7)                                                     |
| α/°                                | 90                                                             |
| β/°                                | 94.308(4)                                                      |
| γ/°                                | 90                                                             |
| Volume/Å <sup>3</sup>              | 792.96(6)                                                      |
| Z                                  | 2                                                              |
| ρ <sub>calc</sub> /mm <sup>3</sup> | 1.998                                                          |
| μ/mm <sup>-1</sup>                 | 9.447                                                          |
| F(000)                             | 460.0                                                          |
| Crystal size/mm <sup>3</sup>       | 0.25 × 0.2 × 0.1                                               |
| 2θ range for data collection       | 4.834 to 153.692°                                              |
| Index ranges                       | -6 ≤ h ≤ 6, -9 ≤ k ≤ 9, -23 ≤ l ≤ 23                           |
| Reflections collected              | 16382                                                          |

|                                             |                                                   |
|---------------------------------------------|---------------------------------------------------|
| Independent reflections                     | 3232[R(int) = 0.1869]                             |
| Data/restraints/parameters                  | 3232/1/181                                        |
| Goodness-of-fit on F <sup>2</sup>           | 1.109                                             |
| Final R indexes [I >= 2σ(I)]                | R <sub>1</sub> = 0.0697, wR <sub>2</sub> = 0.1568 |
| Final R indexes [all data]                  | R <sub>1</sub> = 0.0934, wR <sub>2</sub> = 0.1783 |
| Largest diff. peak/hole / e Å <sup>-3</sup> | 1.01/-1.63                                        |
| Flack parameter                             | -0.08(6)                                          |

## The Single Crystal X-ray Diffraction Study of **6h**

To ascertain the structural correctness of these products, a crystallizing form of **6h** was obtained and the structure was undisputedly confirmed by single crystal X-ray analysis.

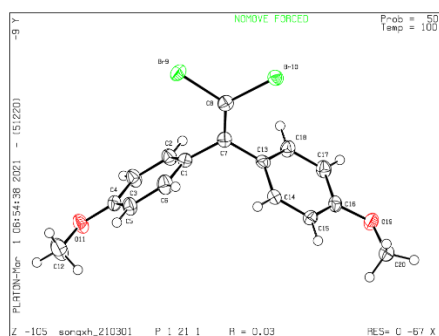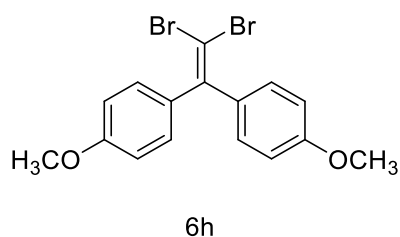

Fig. S2 X-ray single crystal structure of **6h**, CCDC: 2082642.

|                                    |                                                                |
|------------------------------------|----------------------------------------------------------------|
| Identification code                | songxh_210301                                                  |
| Empirical formula                  | C <sub>16</sub> H <sub>14</sub> Br <sub>2</sub> O <sub>2</sub> |
| Formula weight                     | 398.09                                                         |
| Temperature/K                      | 100.00(10)                                                     |
| Crystal system                     | monoclinic                                                     |
| Space group                        | P2 <sub>1</sub>                                                |
| a/Å                                | 7.96300(10)                                                    |
| b/Å                                | 6.03520(10)                                                    |
| c/Å                                | 16.0210(2)                                                     |
| α / °                              | 90                                                             |
| β / °                              | 93.6370(10)                                                    |
| γ / °                              | 90                                                             |
| Volume/Å <sup>3</sup>              | 768.391(19)                                                    |
| Z                                  | 2                                                              |
| ρ <sub>calc</sub> /cm <sup>3</sup> | 1.721                                                          |

|                                                |                                                               |
|------------------------------------------------|---------------------------------------------------------------|
| $\mu / \text{mm}^{-1}$                         | 6.678                                                         |
| F(000)                                         | 392.0                                                         |
| Crystal size/ $\text{mm}^3$                    | $0.1 \times 0.05 \times 0.05$                                 |
| Radiation                                      | Cu K $\alpha$ ( $\lambda = 1.54184$ )                         |
| $2\theta$ range for data collection/ $^\circ$  | 5.528 to 154.082                                              |
| Index ranges                                   | $-9 \leq h \leq 9, -7 \leq k \leq 7, -20 \leq l \leq 18$      |
| Reflections collected                          | 15800                                                         |
| Independent reflections                        | 3060 [ $R_{\text{int}} = 0.0519, R_{\text{sigma}} = 0.0321$ ] |
| Data/restraints/parameters                     | 3060/1/183                                                    |
| Goodness-of-fit on $F^2$                       | 1.113                                                         |
| Final R indexes [ $I \geq 2\sigma(I)$ ]        | $R_1 = 0.0280, wR_2 = 0.0673$                                 |
| Final R indexes [all data]                     | $R_1 = 0.0286, wR_2 = 0.0676$                                 |
| Largest diff. peak/hole / $e \text{ \AA}^{-3}$ | 0.46/-0.47                                                    |
| Flack parameter                                | -0.04(2)                                                      |

## Gram-scale Synthesis

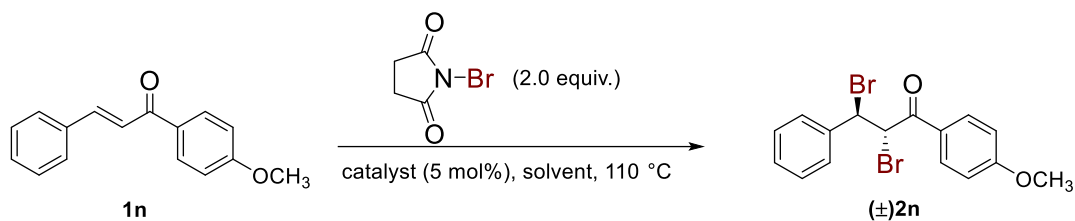

To a 50 ml Schlenk tube was added olefin (**1n**) (1.19 g, 5 mmol), NBS (2.22 g, 1.25 mmol),  $\text{Mn}_2(\text{CO})_{10}$  (79 mg, 4 mol%), then 20 ml DCE was added. The mixture was stirred at 110 °C for 12 hours. (Monitored by TLC). After cooling down to room temperature, the mixture was filtered through a Celite pad, evaporated the solvent for crude  $^1\text{H-NMR}$ . The crude residue was separated by column chromatography on a silica gel column using PE/EA (100/1, v/v) as eluent, the desired product **2n** was obtained in 84% yield, 12:1 dr (1.67g).

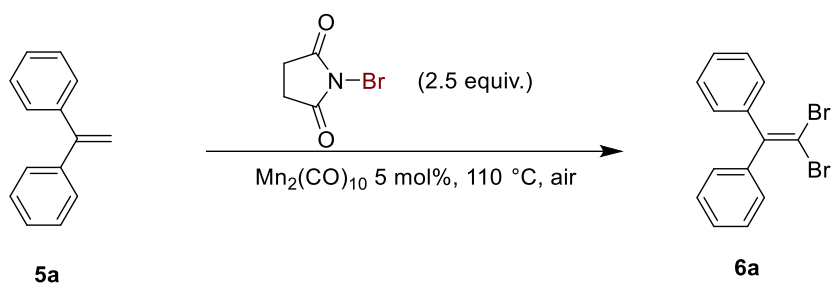

To a 50 ml Schlenk tube was added olefin (**5a**) (0.72 g, 4 mmol), NBS (1.77 g, 1.00 mmol),  $\text{Mn}_2(\text{CO})_{10}$  (78 mg, 5 mol%), then 20 ml DCE was added. The mixture was stirred at 110 °C for 36 hours (monitored by TLC). After cooling down to room temperature, the mixture was filtered through a Celite pad, evaporated the solvent. The crude residue was separated by column chromatography on a silica gel column using PE/EA (100/1, v/v) as eluent, the desired product **6a** was obtained in 95% yield (1.29 g).

## Synthesis of 1,1,2,2-terphenylethene (TPE)

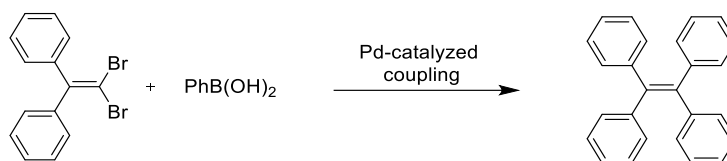

To a two-neck flask (100 ml), 1,1-dibromo-2,2-diphenylethene (**6a**) (0.67 g, 2 mmol), boronic acid (**2**) (0.31 g, 2.5 mmol), Pd(PPh<sub>3</sub>)<sub>4</sub> (115 mg, 0.1 mmol), tetrabutylammonium hydrogen sulfate (68 mg, 0.2 mmol), K<sub>2</sub>CO<sub>3</sub> (828 mg, 6 mmol) in toluene (40 ml) were added and heated to 90 °C and stirred under nitrogen overnight. After cooling down to room temperature, the organic layer was separated and the water layer was extracted with dichloromethane (DCM). The combined organic solution was dried with Na<sub>2</sub>SO<sub>4</sub>. After filtration, evaporated the solvent, the crude residue was separated by column chromatography on a silica gel column using DCM/PE (1/9, v/v) as eluent, the desired product **7a** was obtained in 85% yield (0.56 g).

## Controlled experiments

(a)

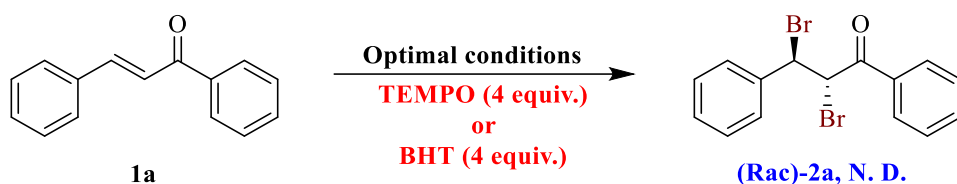

To a 25 ml Schlenk tube was added olefin (**1a**) (0.2 mmol), NBS (0.5 mmol),  $\text{Mn}_2(\text{CO})_{10}$  (5 mol%) and TEMPO or BHT (0.8 mmol), then 2 ml DCE was added. The mixture was stirred at 110 °C for 12 hours. After cooling down to room temperature, the mixture was filtered through a Celite pad, evaporated the solvent for crude  $^1\text{H}$  NMR. No desired product was obtained.

(b)

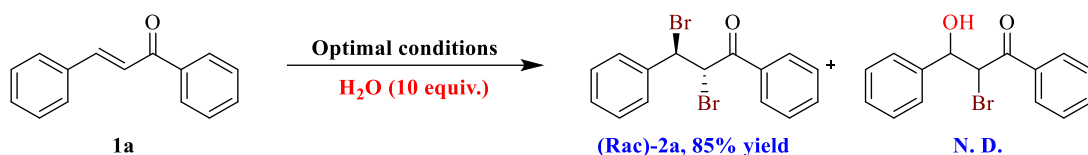

To a 25 ml Schlenk tube was added olefin (**1a**) (0.2 mmol), NBS (0.5 mmol),  $\text{Mn}_2(\text{CO})_{10}$  (5 mol%) and  $\text{H}_2\text{O}$  (18 mg, 10.0 eq.), then 2 ml DCE was added. The mixture was stirred at 110 °C for 12 hours. (monitored by TLC). After cooling down to room temperature, the mixture was filtered through a Celite pad and evaporated the solvent. The crude residue was separated by column chromatography on a silica gel column using PE/EA (100/1, v/v) as eluent, to give the dibromination proceeded smoothly without any other byproducts, the desired product **2a** was obtained in 85% yield.

(c)

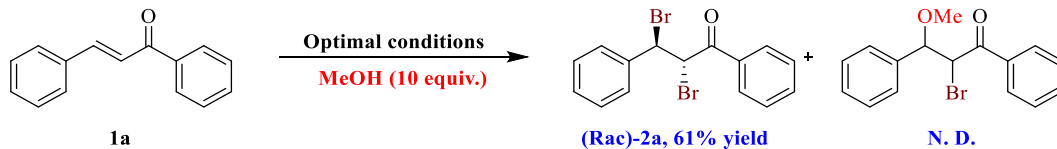

To a 25 ml Schlenk tube was added olefin (**1a**) (0.2 mmol), NBS (0.5 mmol),  $\text{Mn}_2(\text{CO})_{10}$  (5 mol%) and MeOH (32 mg, 10.0 eq.), then 2 ml DCE was added. The mixture was stirred at 110 °C for 12 hours. (monitored by TLC). After cooling down to room temperature, the mixture was filtered through a Celite pad and evaporated the solvent. The crude residue was separated by column chromatography on a silica gel column using PE/EA (100/1, v/v) as eluent, to give the dibromination proceeded smoothly without

any other byproducts, the desired product **2a** was obtained in 61% yield.

(d)

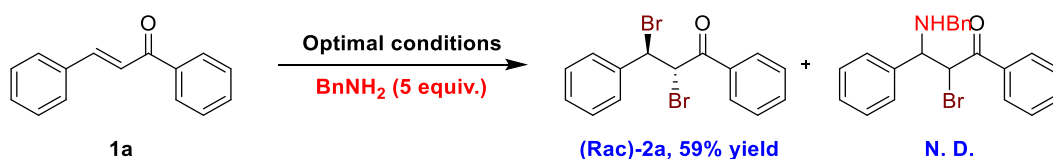

To a 25 ml Schlenk tube was added olefin (**1a**) (0.2 mmol), NBS (0.5 mmol),  $\text{Mn}_2(\text{CO})_{10}$  (5 mol%) and  $\text{BnNH}_2$  (107 mg, 10.0 eq.), then 2 ml DCE was added. The mixture was stirred at 110 °C for 12 hours. (monitored by TLC). After cooling down to room temperature, the mixture was filtered through a Celite pad and evaporated the solvent. The crude residue was separated by column chromatography on a silica gel column using PE/EA (100/1, v/v) as eluent, to give the dibromination proceeded smoothly without any other byproducts, the desired product **2a** was obtained in 61% yield.

(e)

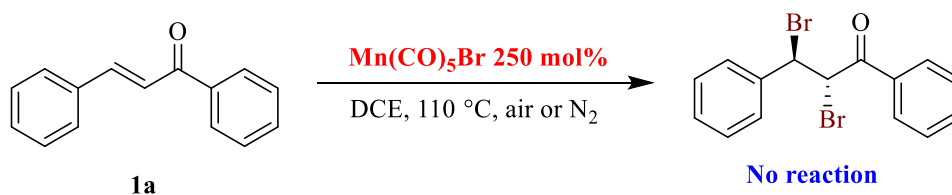

To a 25 ml Schlenk tube was added olefin (**1a**) (0.2 mmol) and 250%  $\text{Mn}(\text{CO})_5\text{Br}$ , then 2 ml DCE was added. The mixture was stirred at 110 °C for 12 hours. (monitored by TLC). After cooling down to room temperature, the mixture was filtered through a Celite pad, evaporated the solvent for crude  $^1\text{H}$  NMR. No reaction was happened.



## The mass spectra of intermediate (B) and (D).

To a 25 ml Schlenk tube was added olefin (**1a**) (0.2 mmol), NBS (0.5 mmol) and  $\text{Mn}_2(\text{CO})_{10}$  (0.2 mmol), then 2 ml DCE was added. The mixture was stirred at 110°C for 1 hours. Then the solution was filtered for crude mass spectra detected. The intermediate (**B**) and (**D**) molecular weight was found (see Fig. S1).

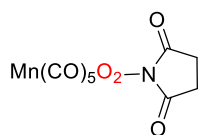

(C)

Calcd m/z  $[\text{M}+\text{H}]^+$ : 325.93

Found : 326.10

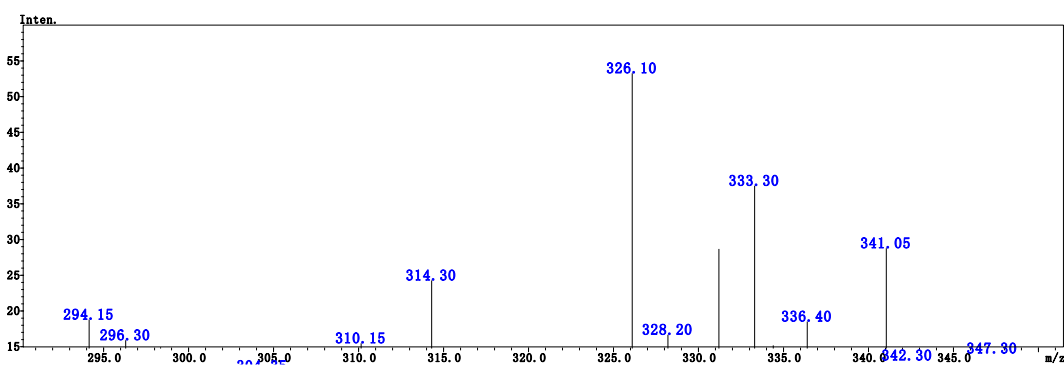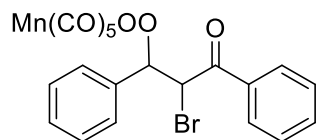

Calcd m/z  $[\text{M}+\text{H}]^+$ : 513.91

Found : 513.90

Calcd m/z  $[\text{M}+\text{Na}]^+$ : 536.90

Found : 537.30

Calcd m/z  $[\text{M}+\text{K}]^+$ : 552.87

Found : 553.10

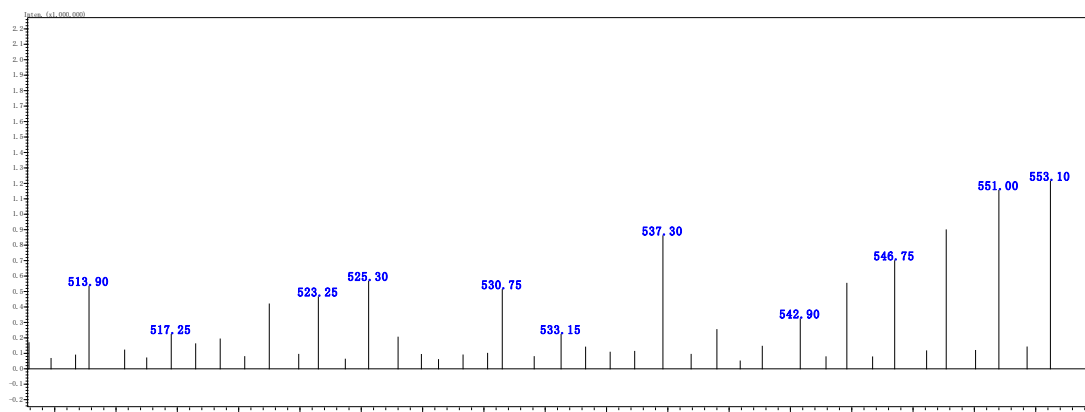

Fig S1. The mass spectra of intermediate (B) and (D).

## Proposed mechanism for Dibrominated Addition of Alkenes (Fig. S2)

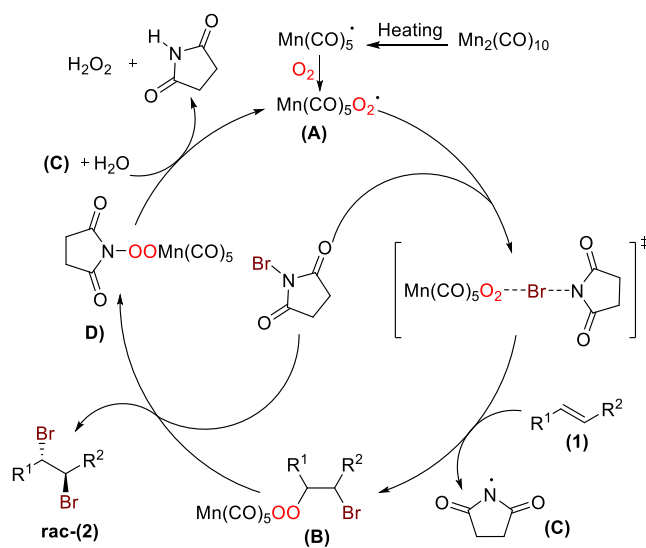

Fig. S2

## Proposed mechanism for Dibrominated Substitution of Alkenes (Fig. S3)

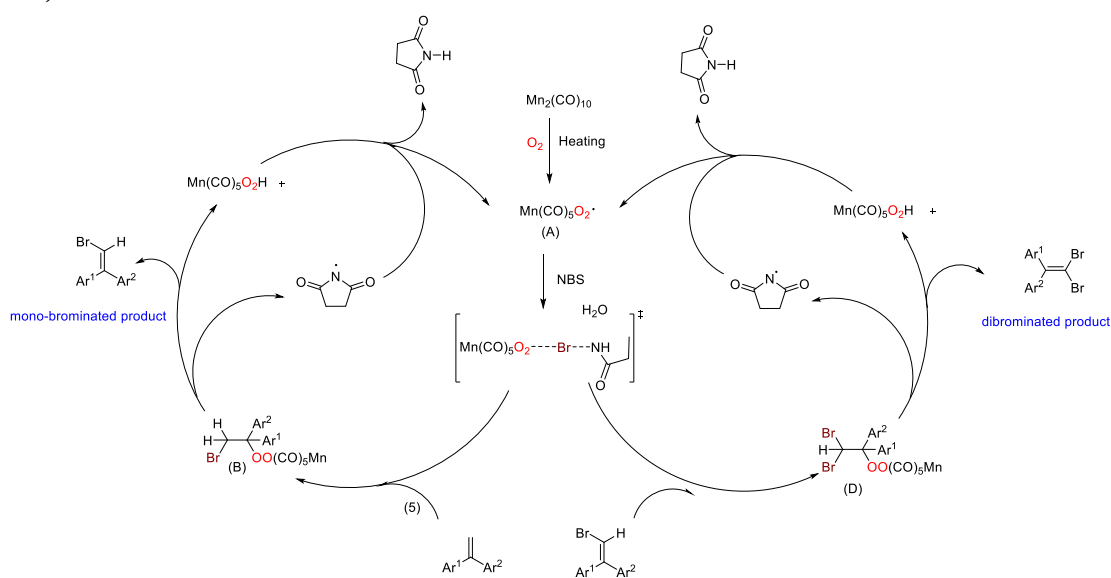

Fig. S3

# NMR spectra

## 2a <sup>1</sup>H NMR

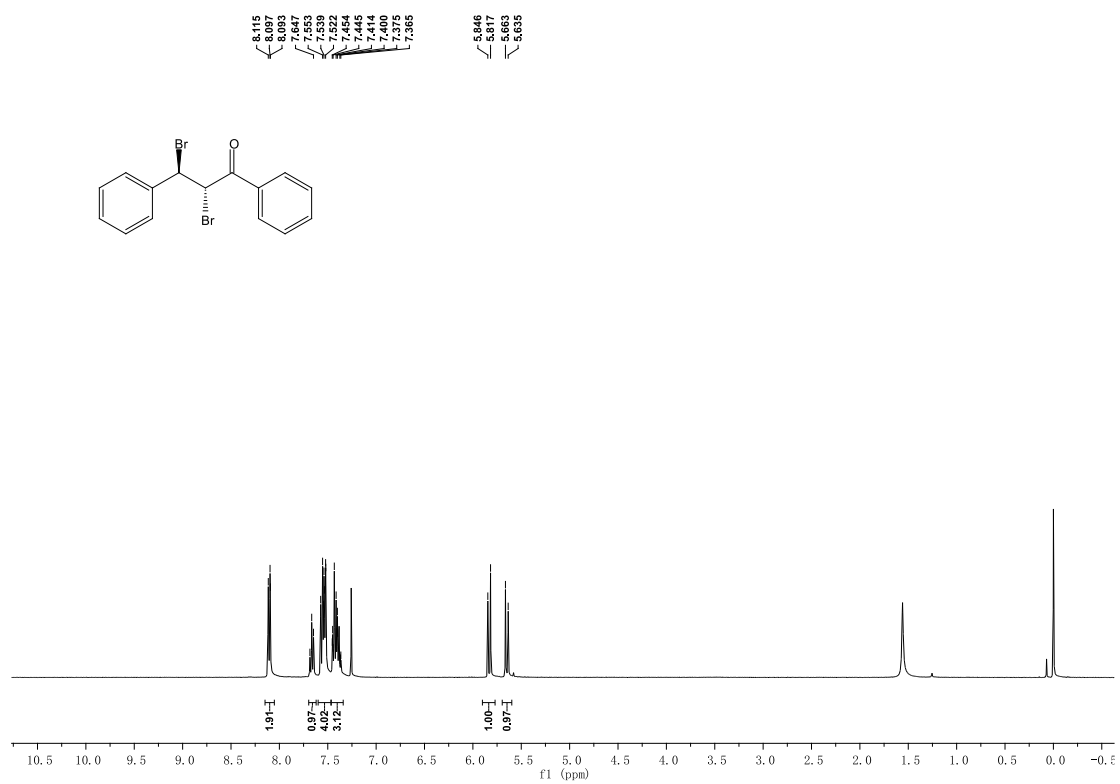

## 2a <sup>13</sup>C NMR

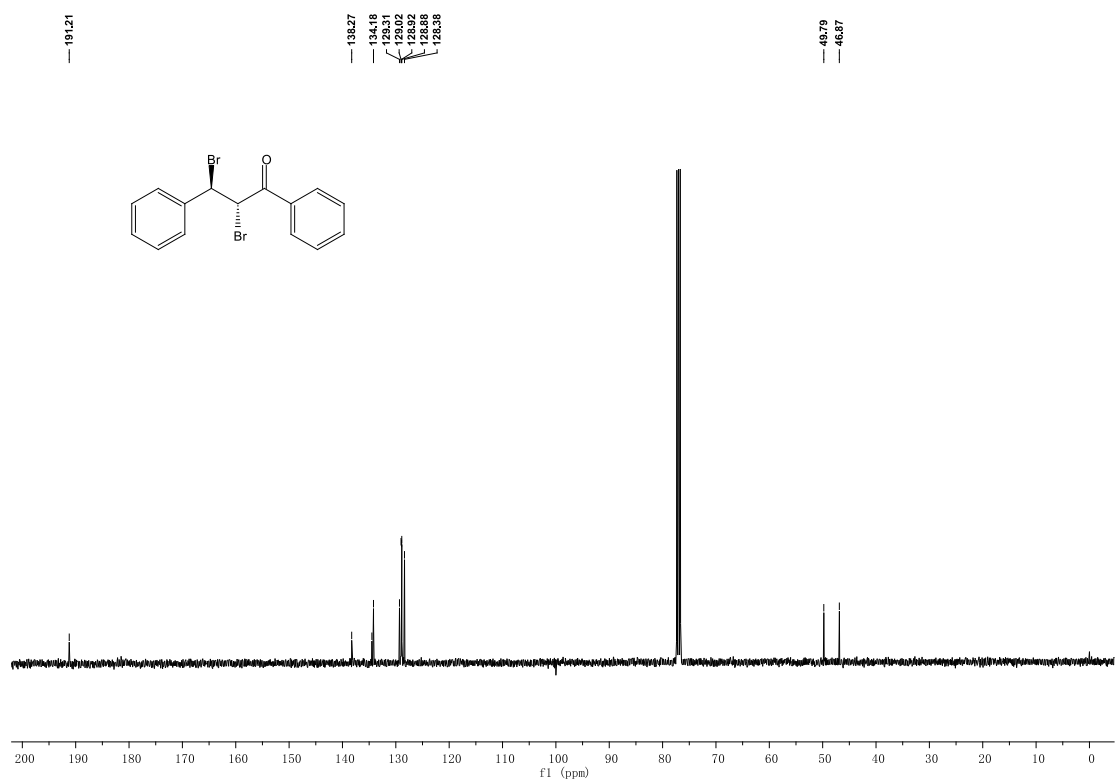

### 2b <sup>1</sup>H NMR

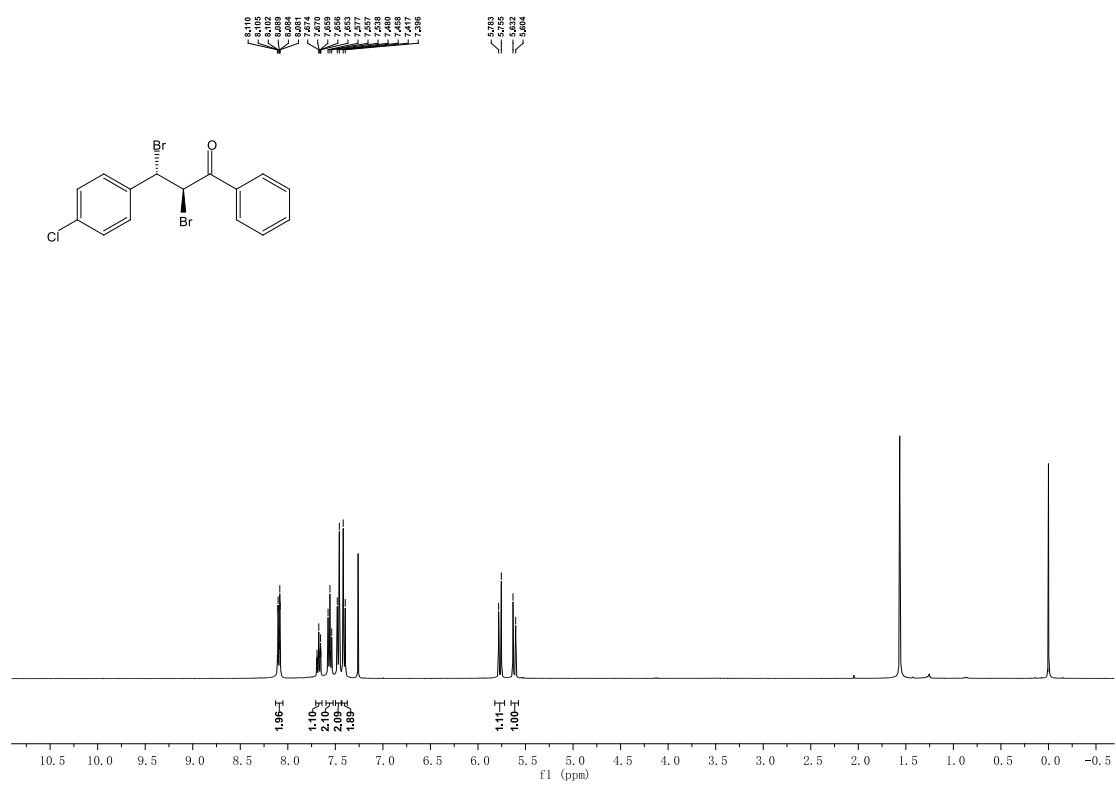

### 2b <sup>13</sup>C NMR

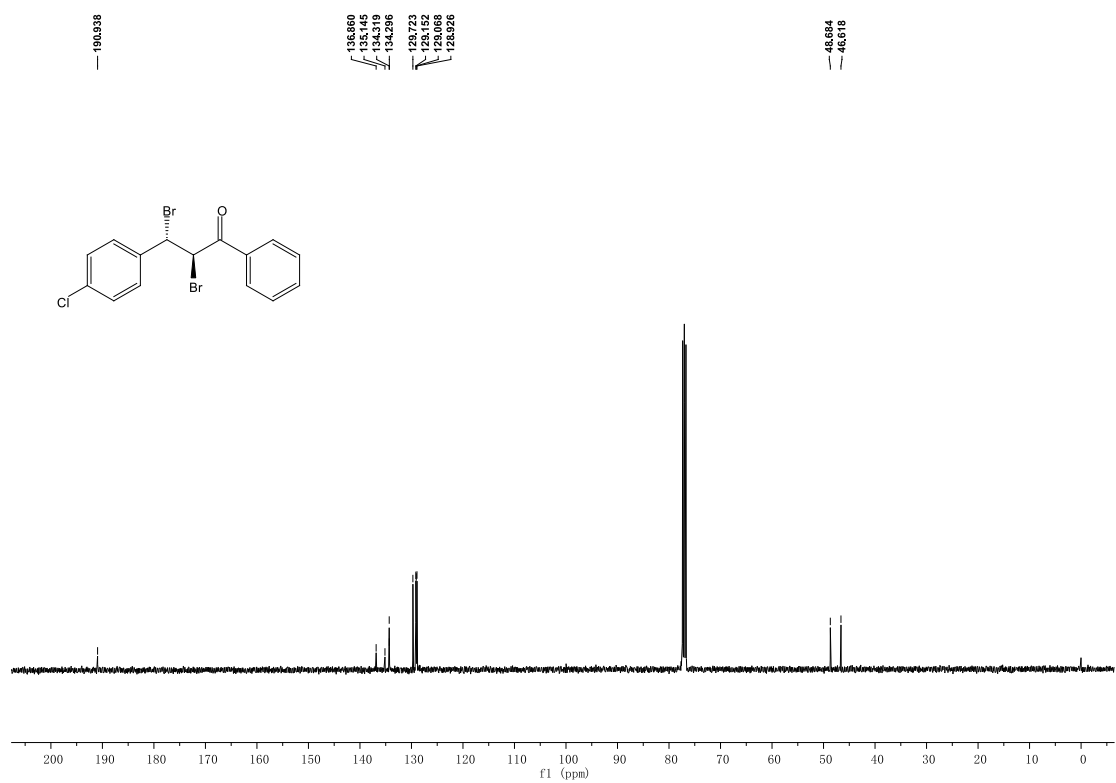

### 2c <sup>1</sup>H NMR

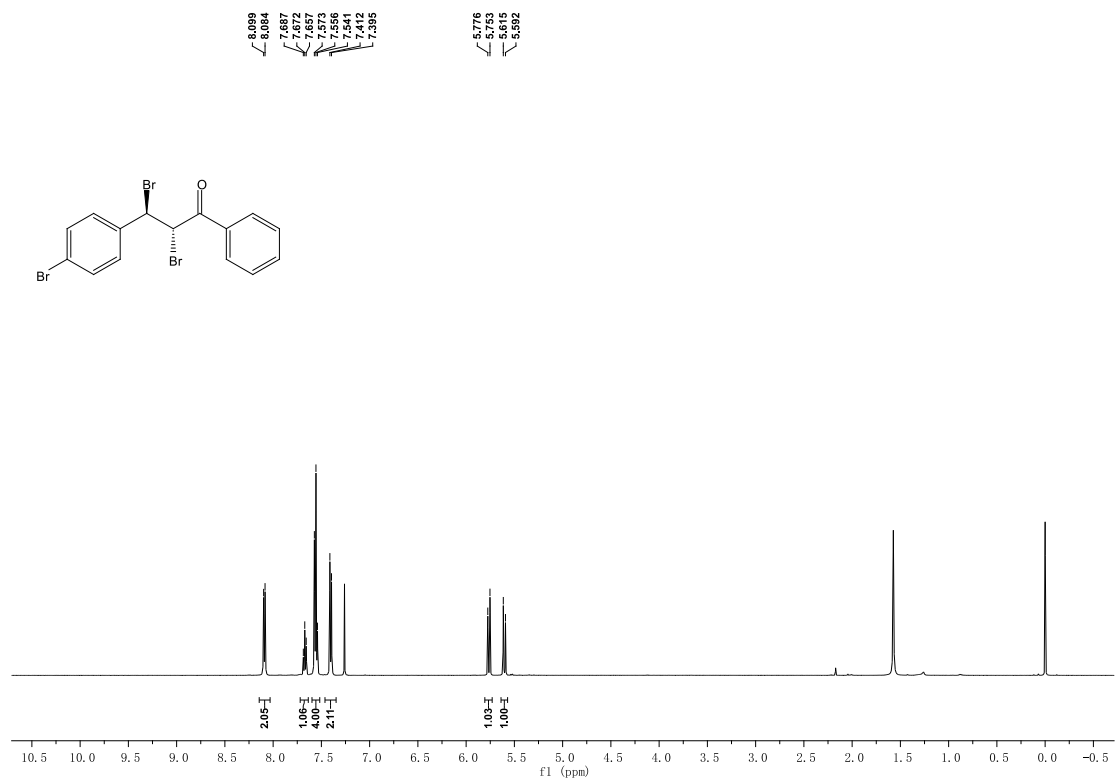

### 2c <sup>13</sup>C NMR

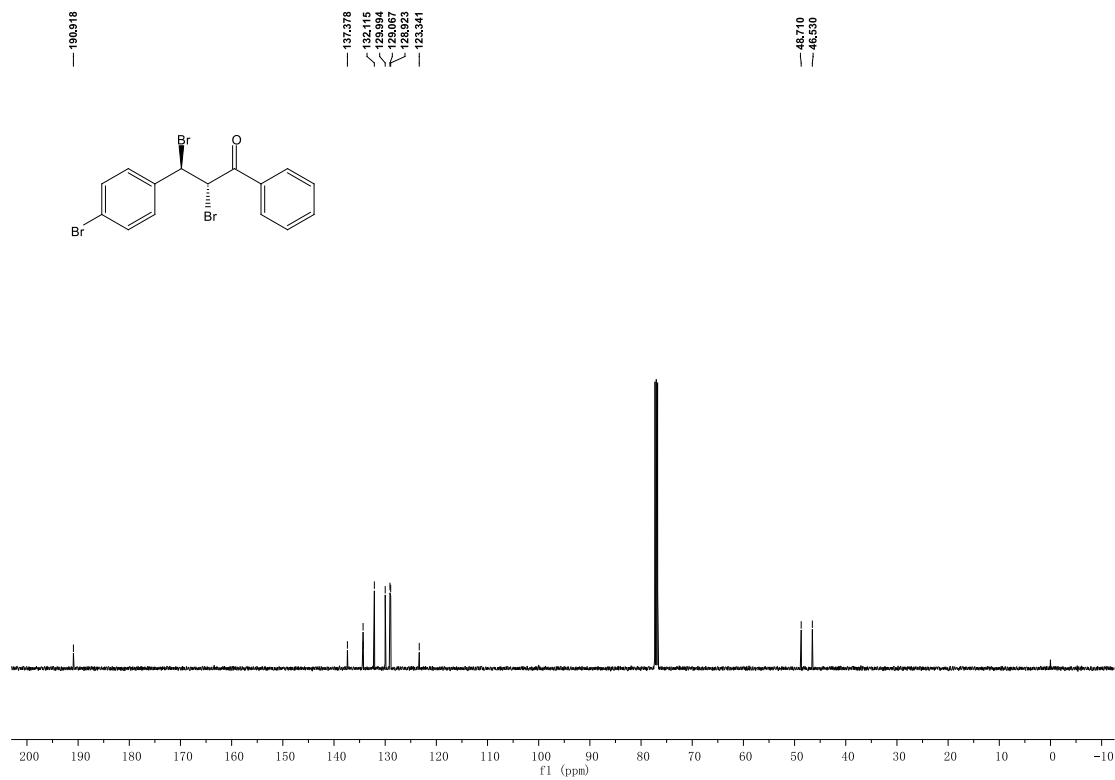

### 2d <sup>1</sup>H NMR

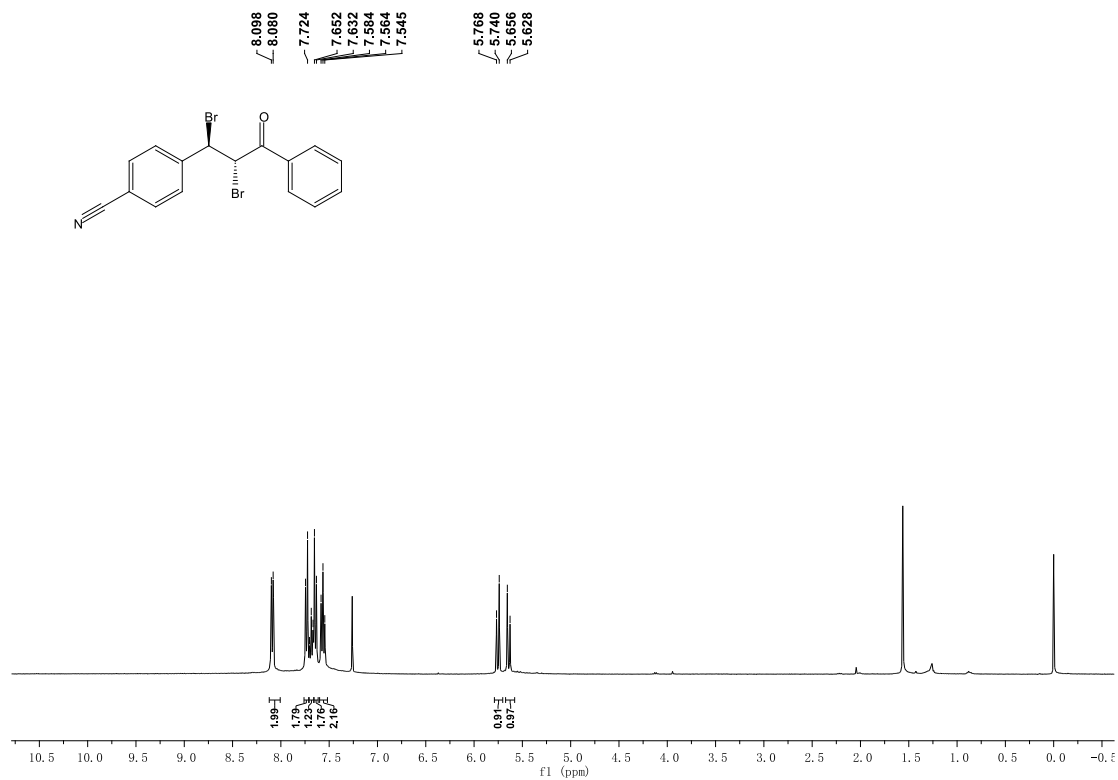

### 2d <sup>13</sup>C NMR

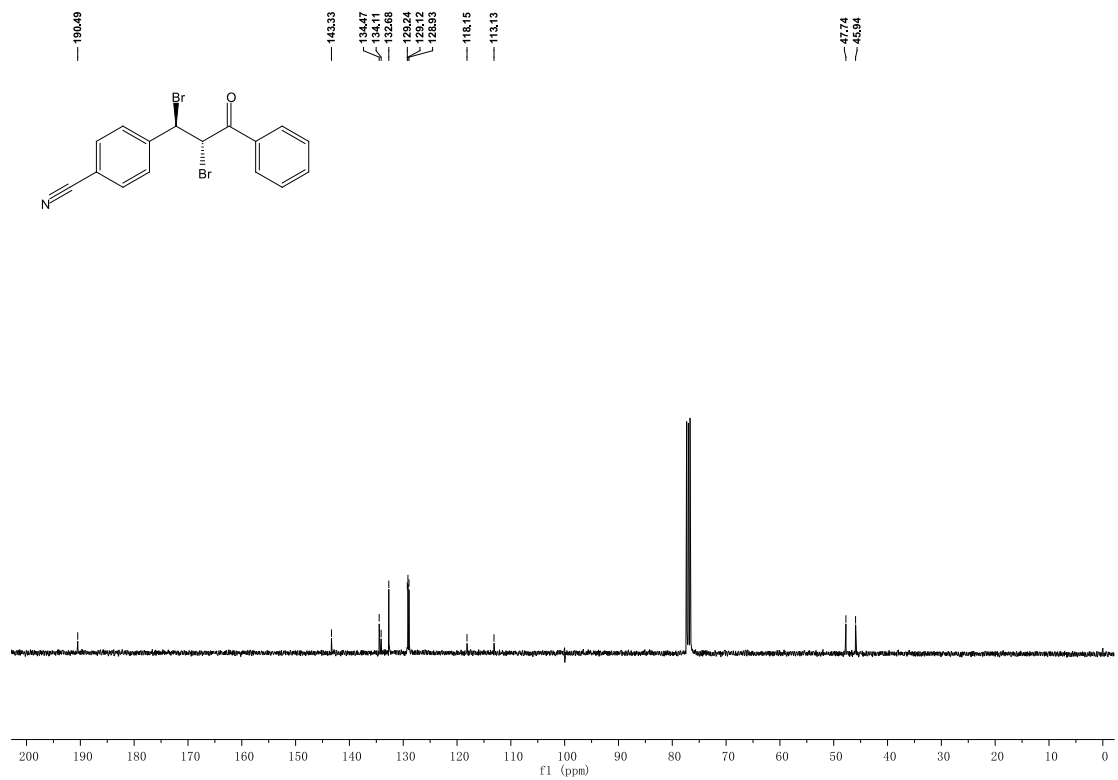

## 2e <sup>1</sup>H NMR

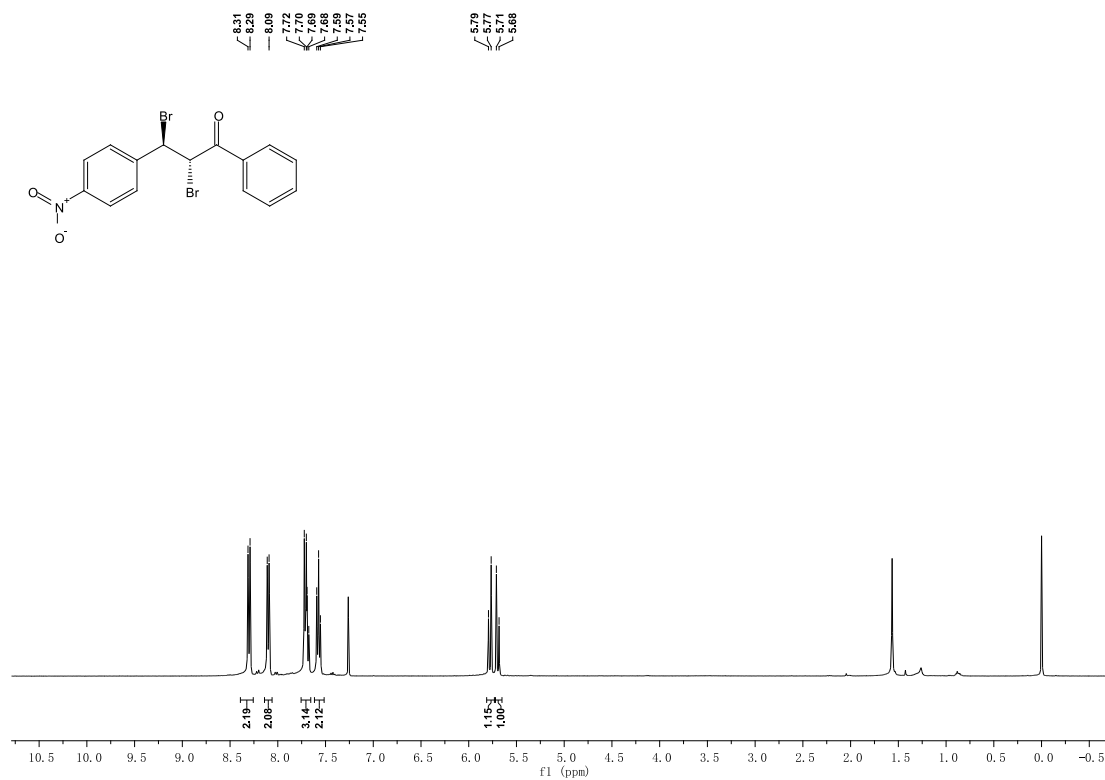

## 2e <sup>13</sup>C NMR

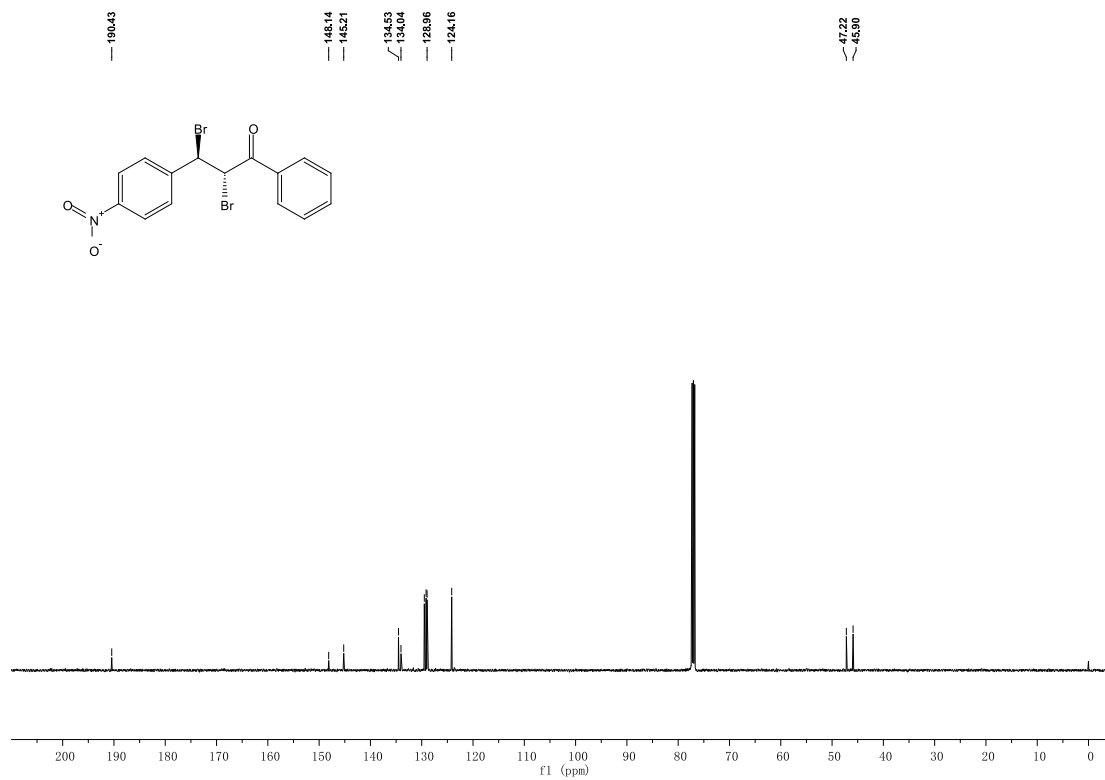

## 2f <sup>1</sup>H NMR

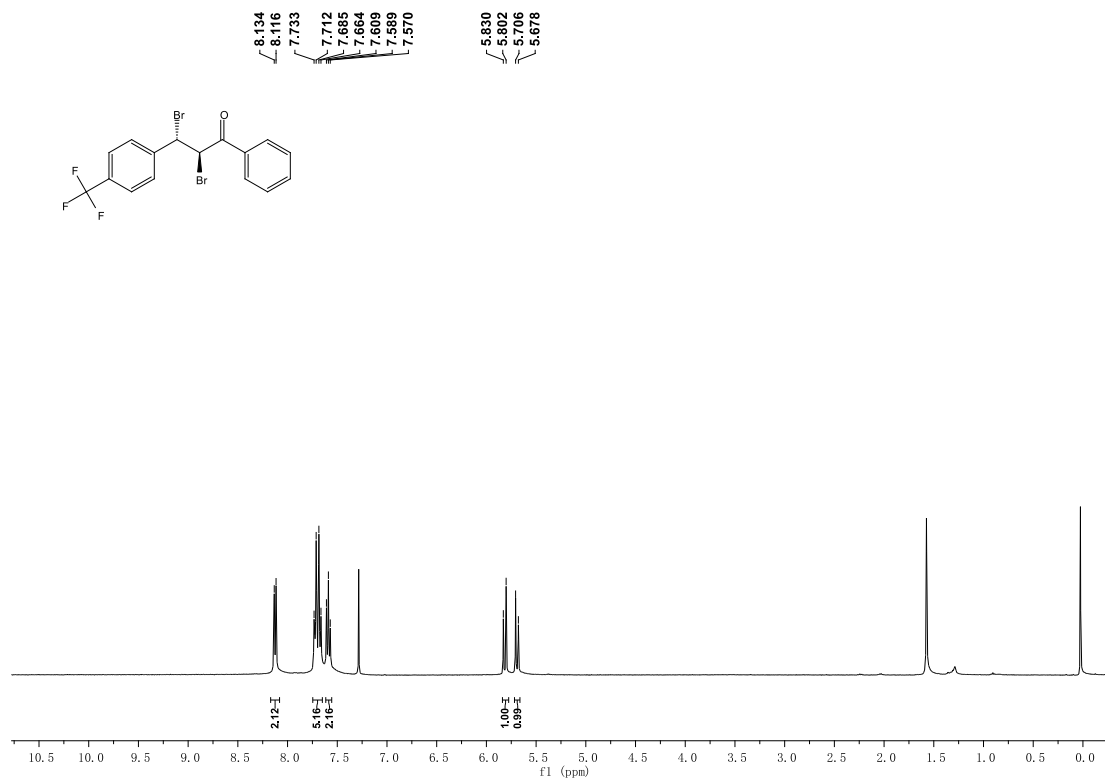

## 2f <sup>13</sup>C NMR

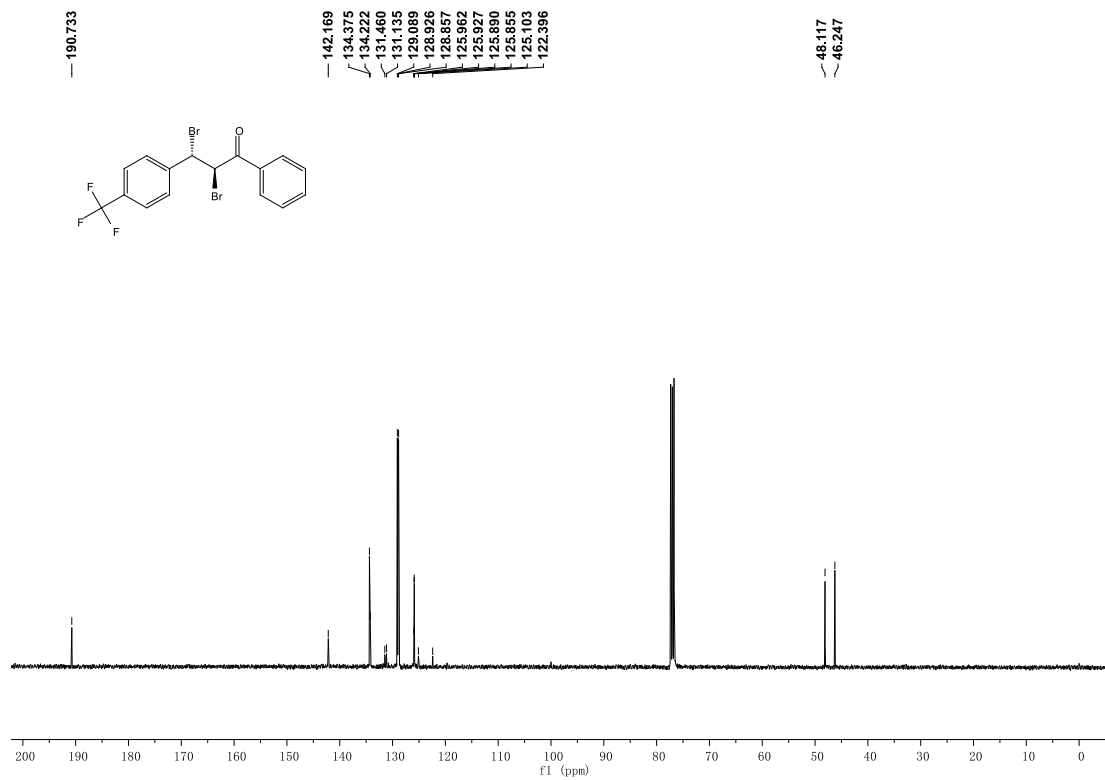



## 2f <sup>19</sup>F NMR

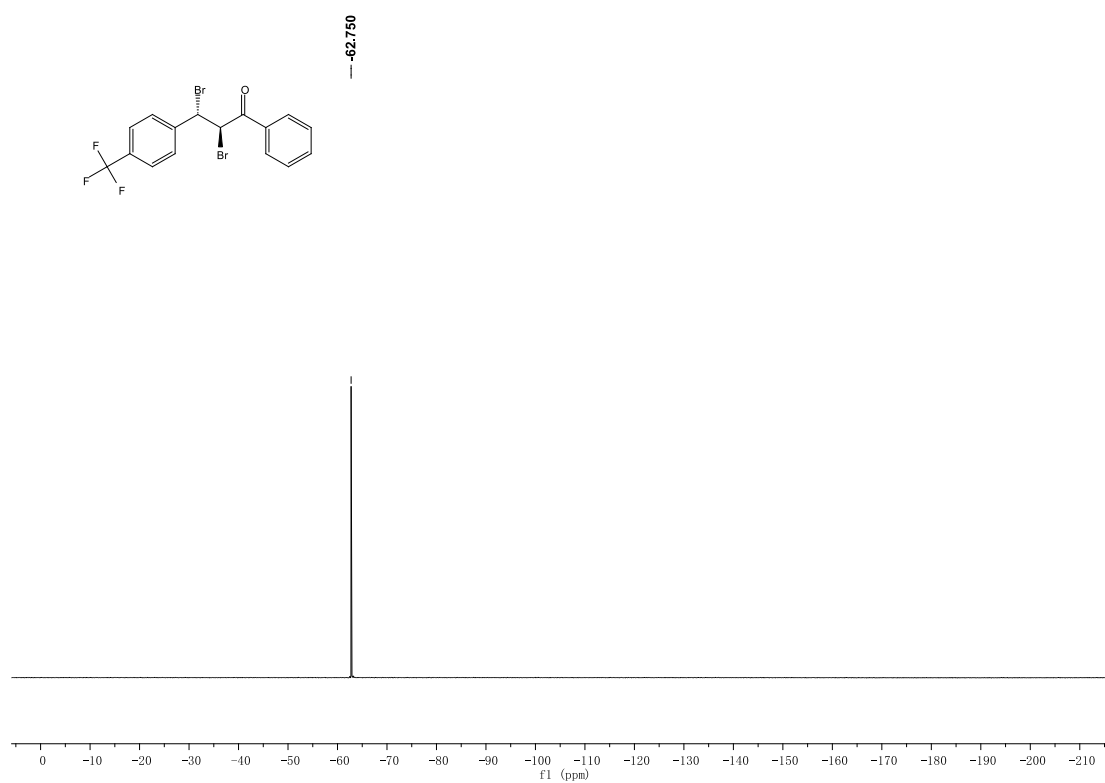

## 2g <sup>1</sup>H NMR

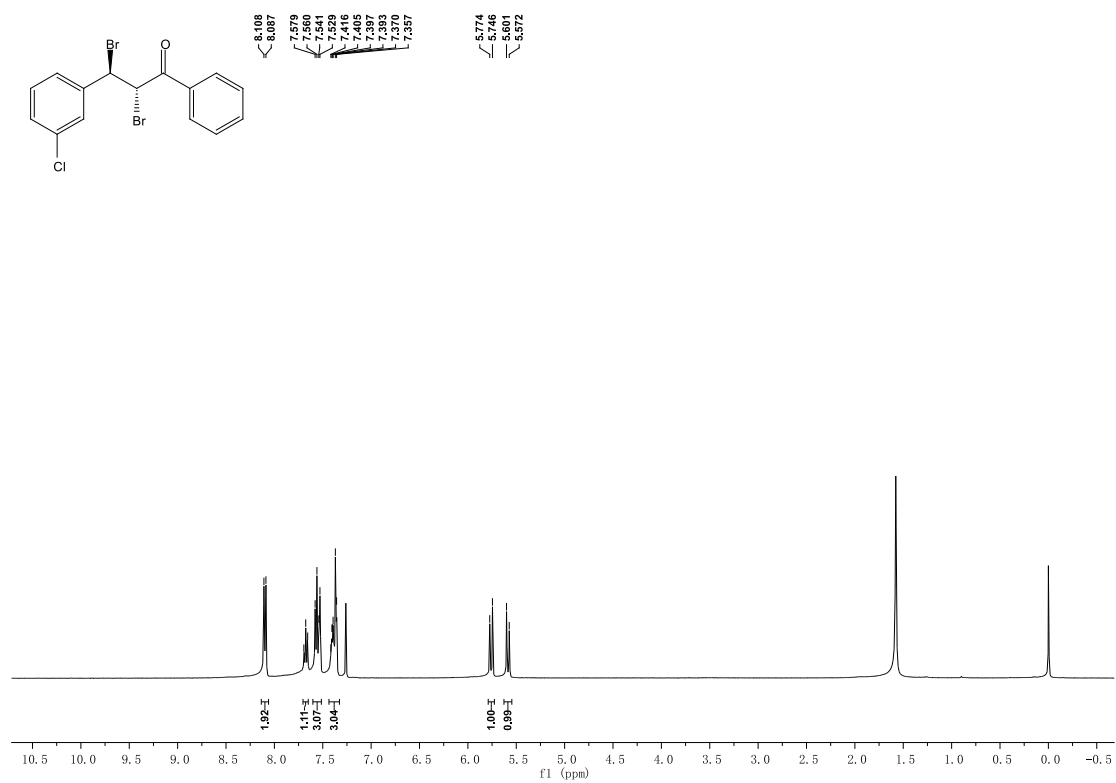

**2g**  $^{13}\text{C}$  NMR

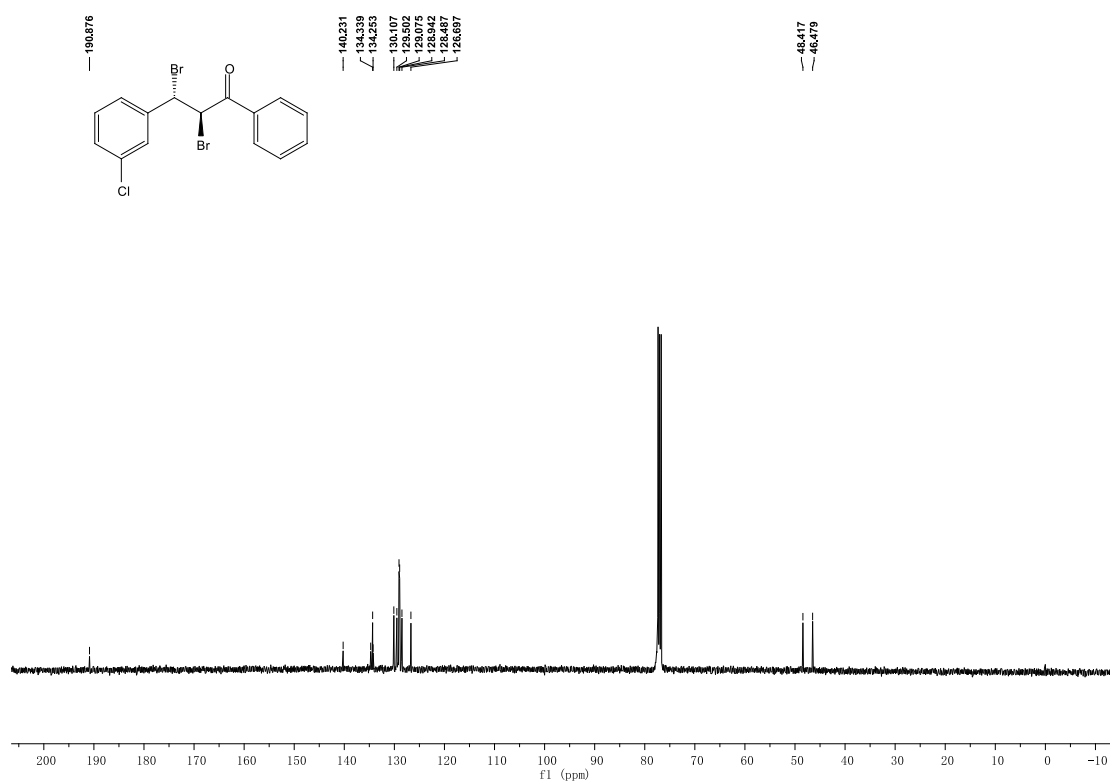

**2h**  $^1\text{H}$  NMR

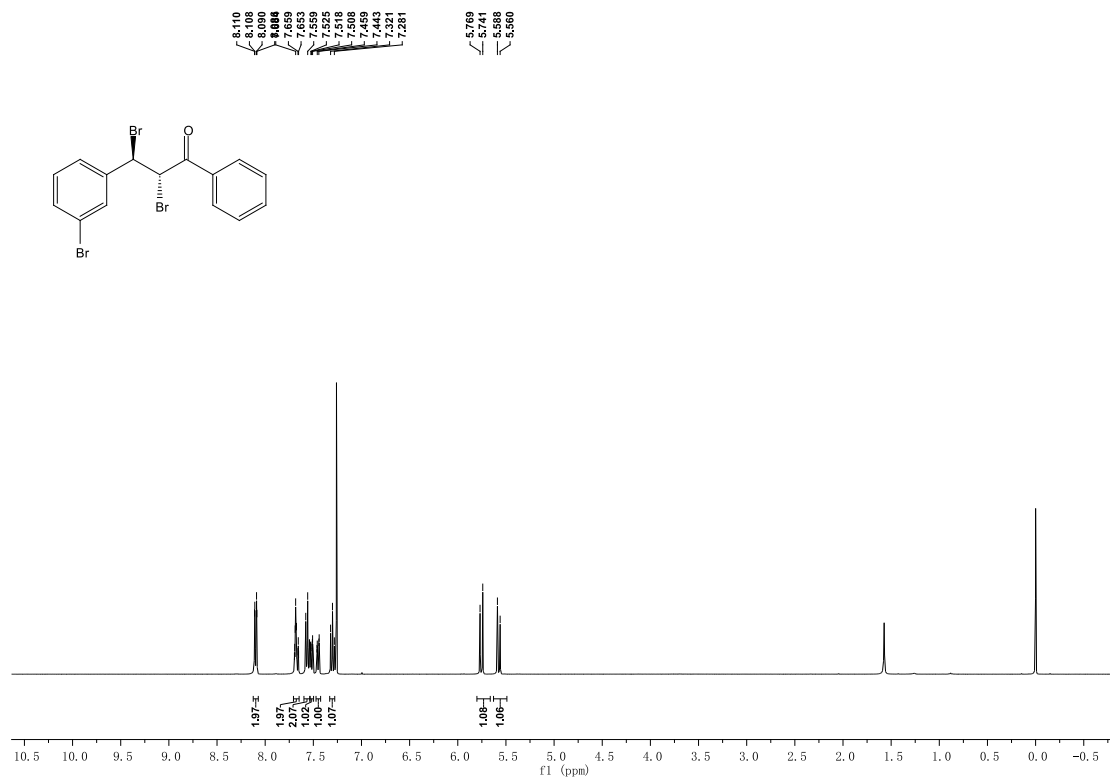

## 2h <sup>13</sup>C NMR

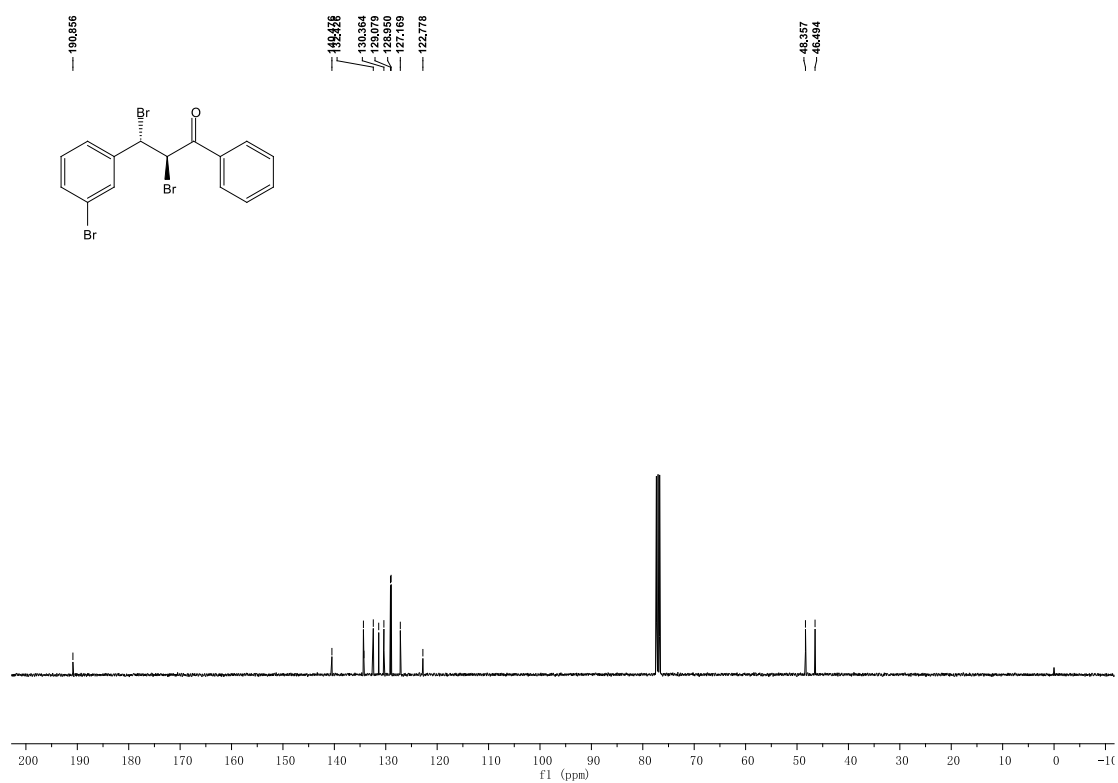

## 2i <sup>1</sup>H NMR

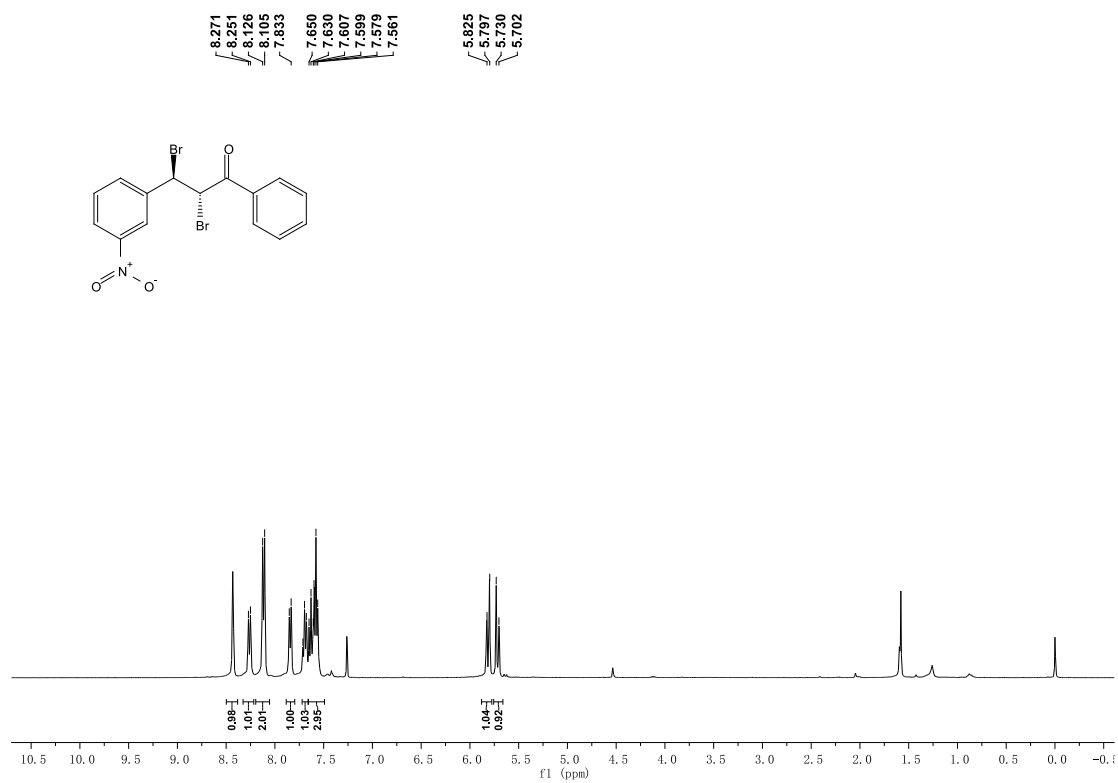

## 2i <sup>13</sup>C NMR

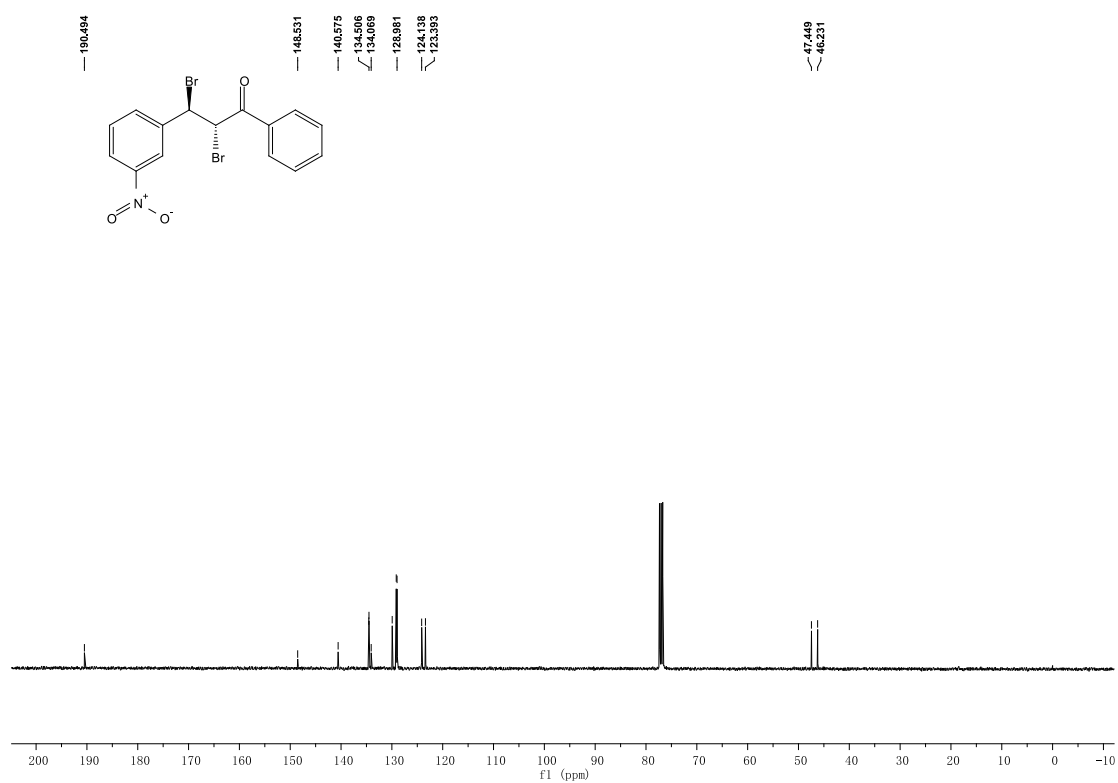

## 2j <sup>1</sup>H NMR

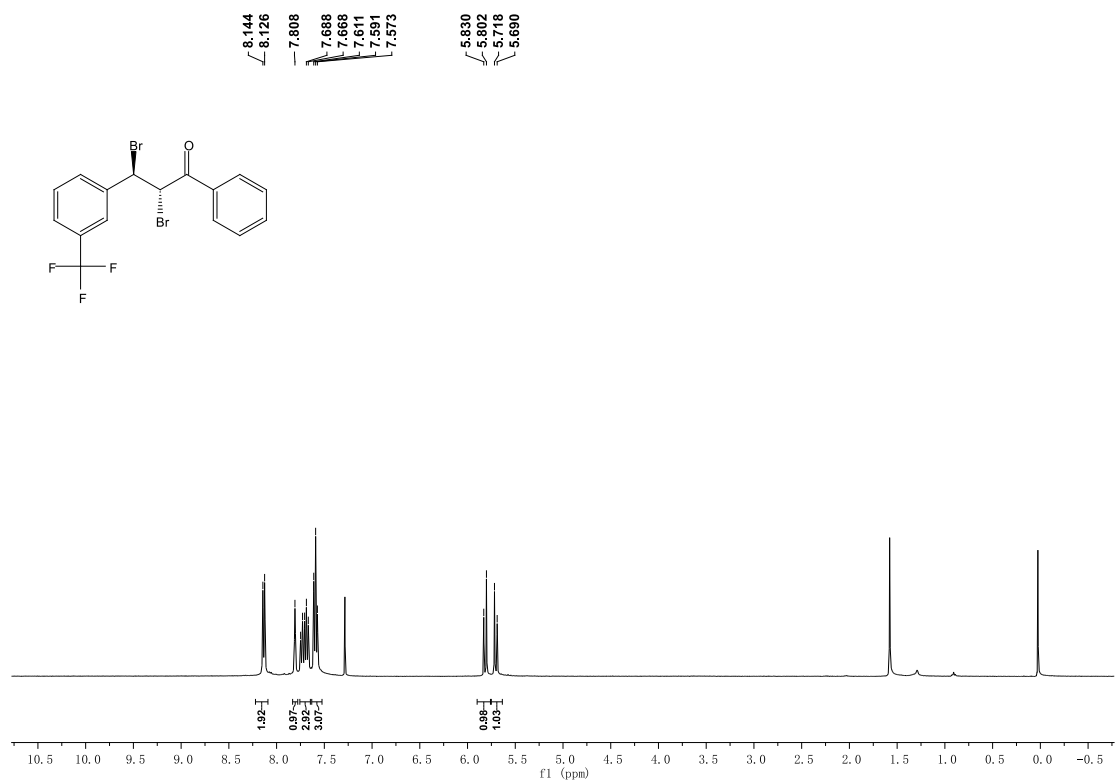

### 2j <sup>13</sup>C NMR

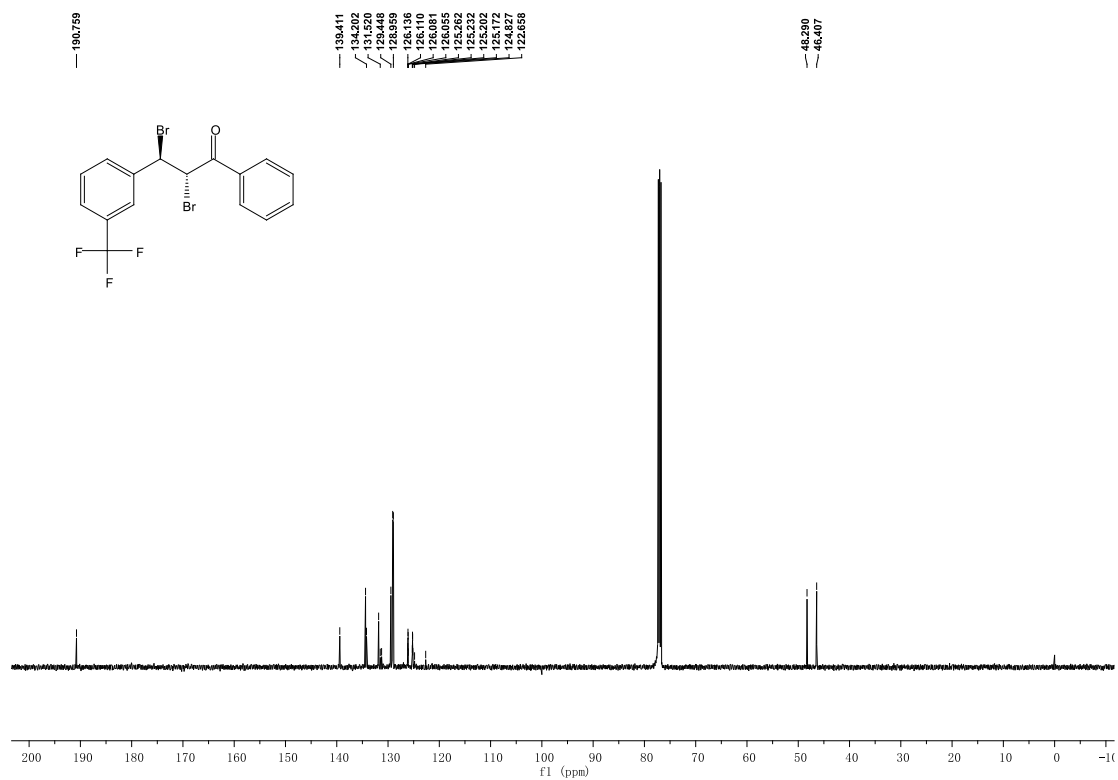

### 2j <sup>19</sup>F NMR

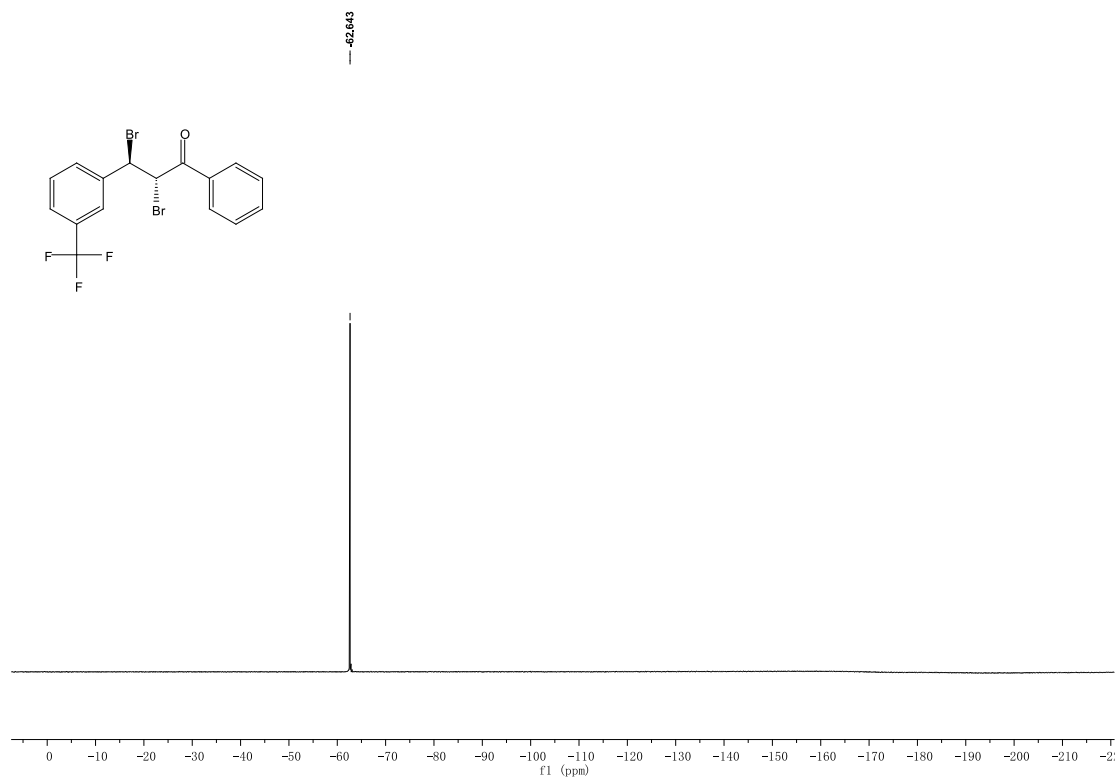

### 2k <sup>1</sup>H NMR

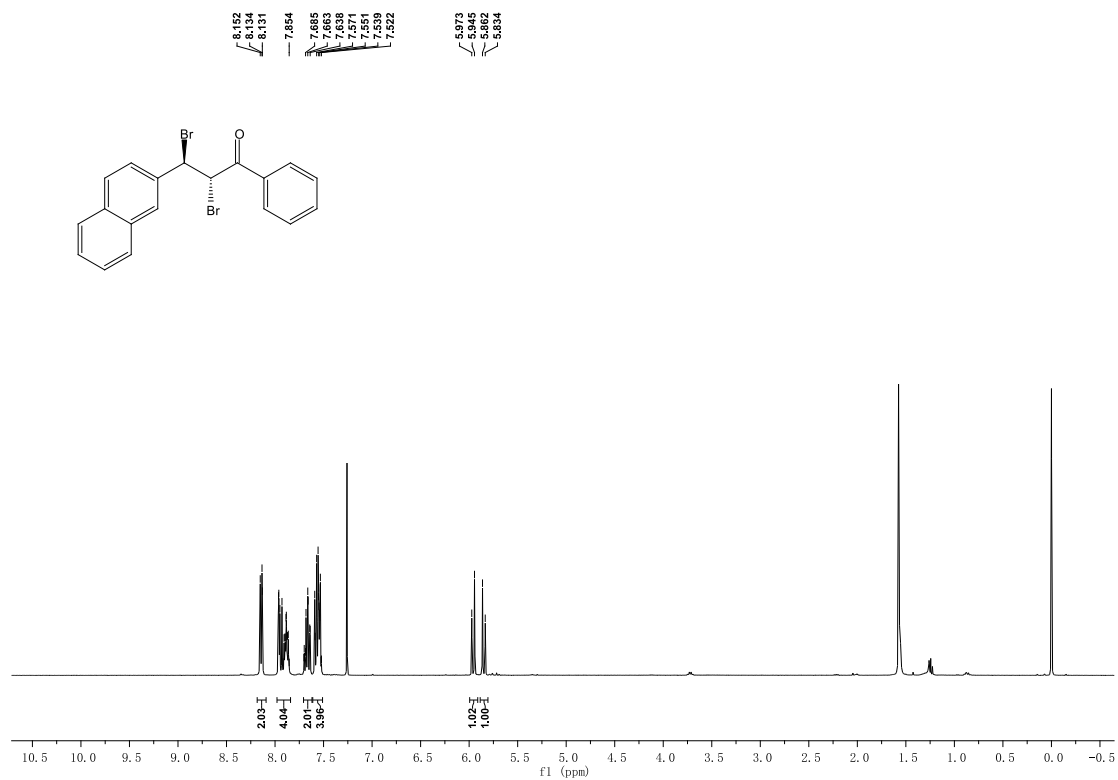

### 2k <sup>13</sup>C NMR

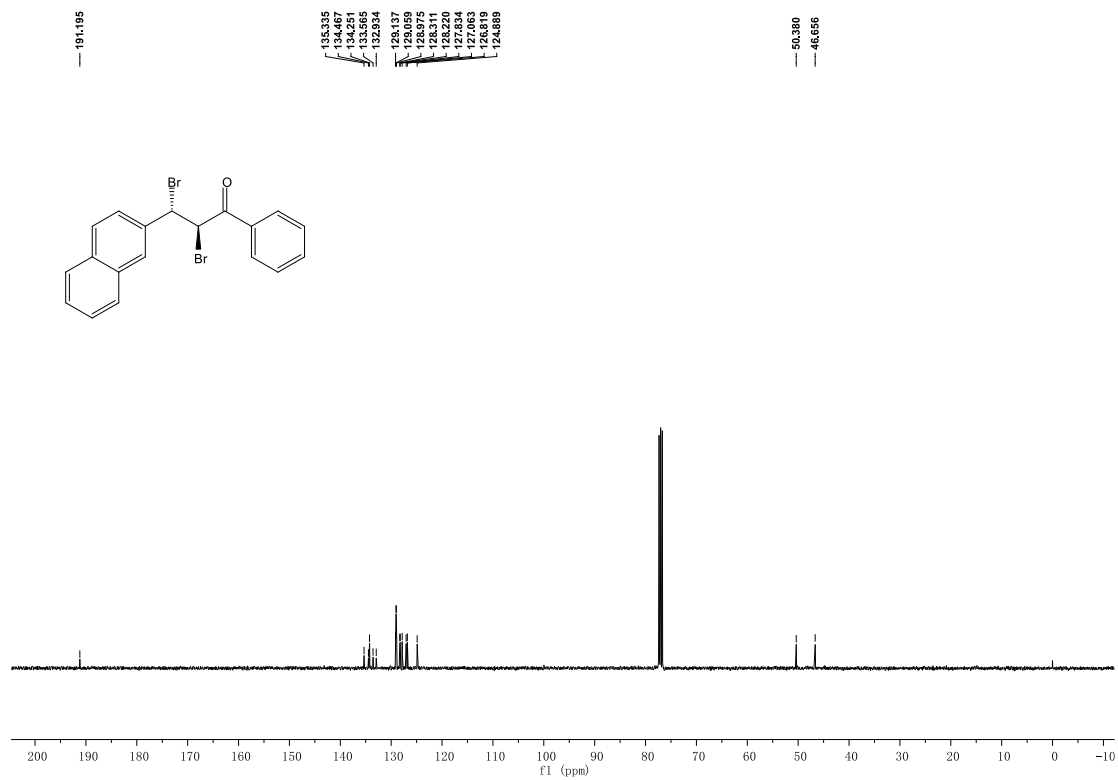

21 <sup>1</sup>H NMR

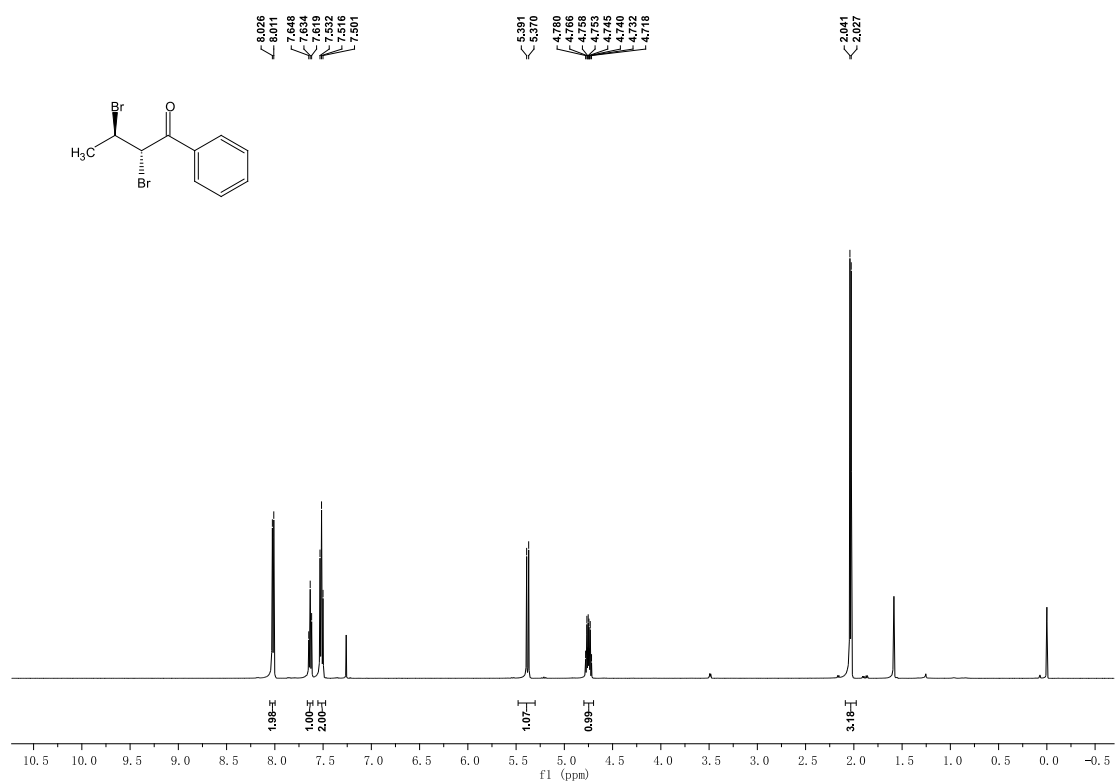

21 <sup>13</sup>C NMR

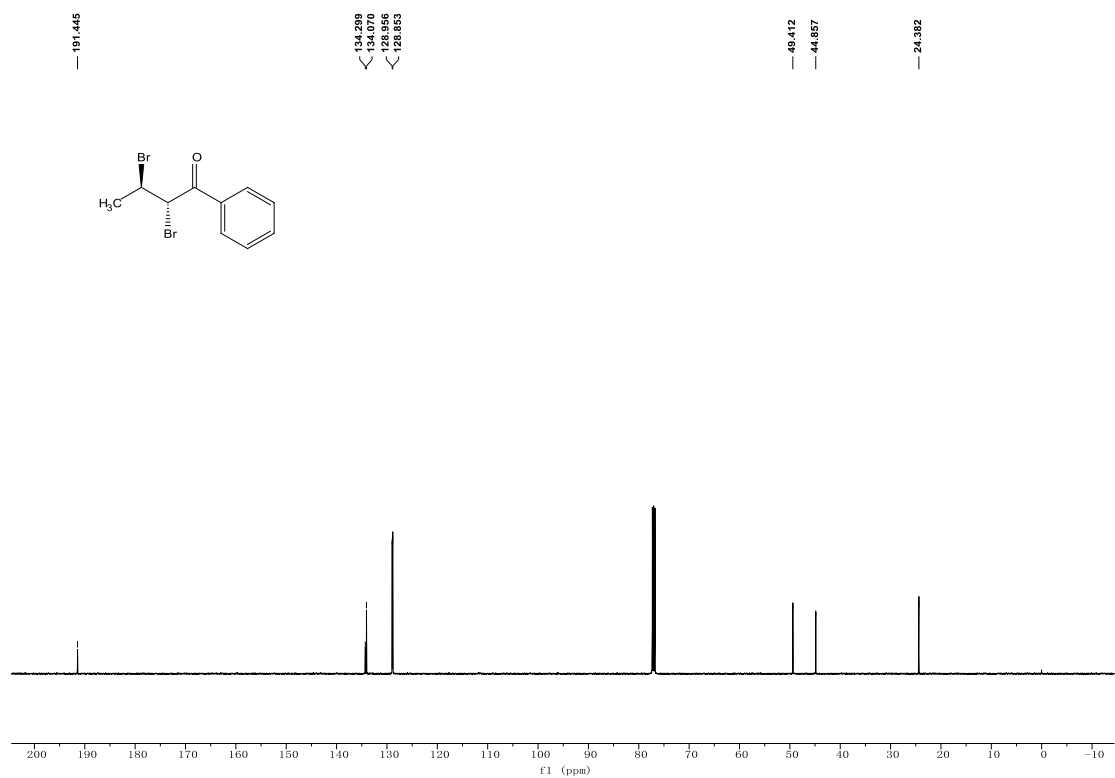

**2m**  $^1\text{H}$  NMR

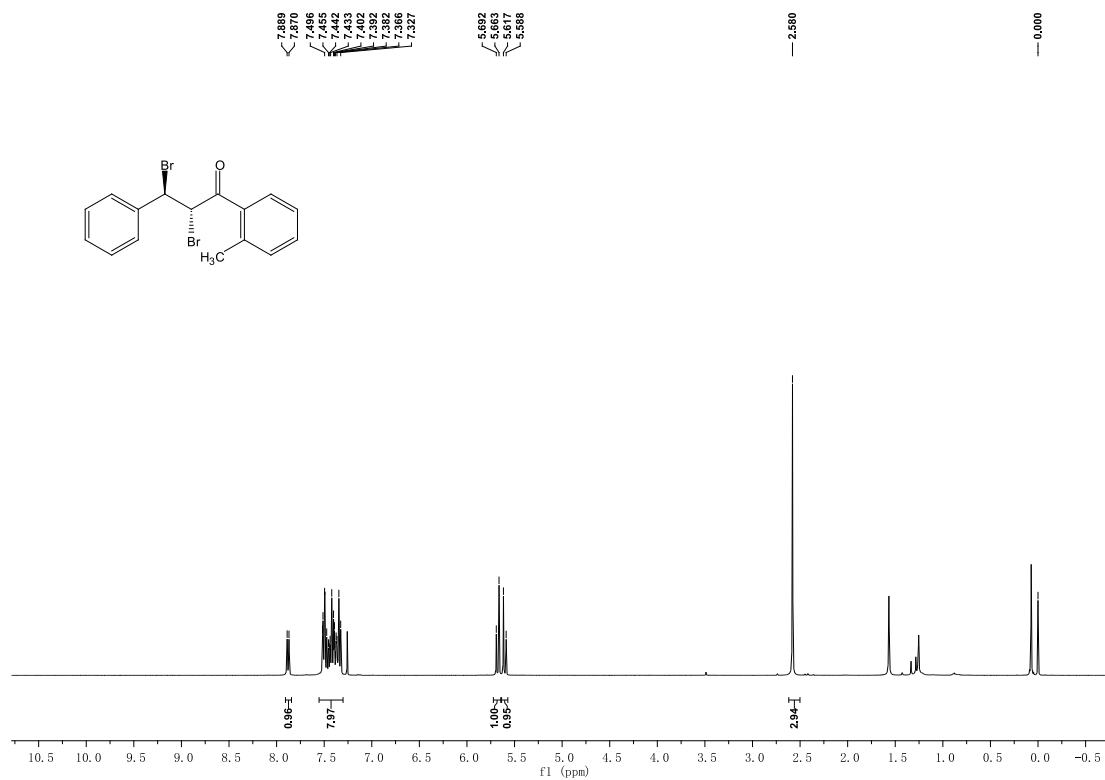

**2m**  $^{13}\text{C}$  NMR

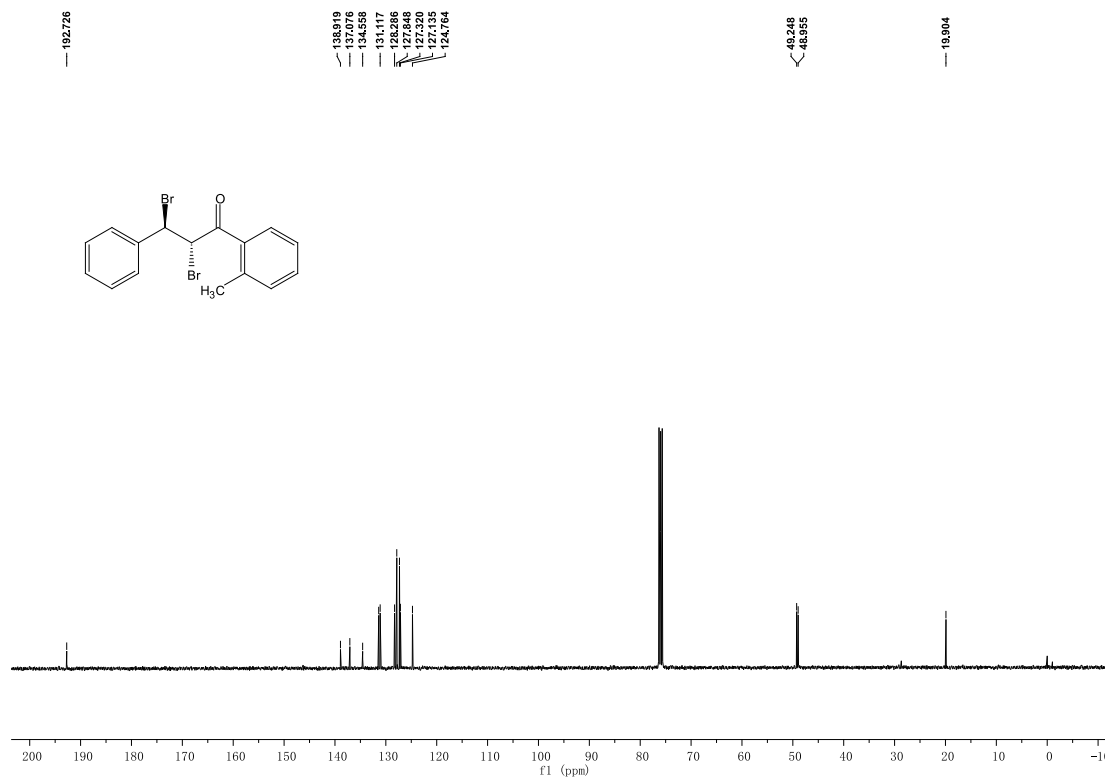



### 2n <sup>1</sup>H NMR

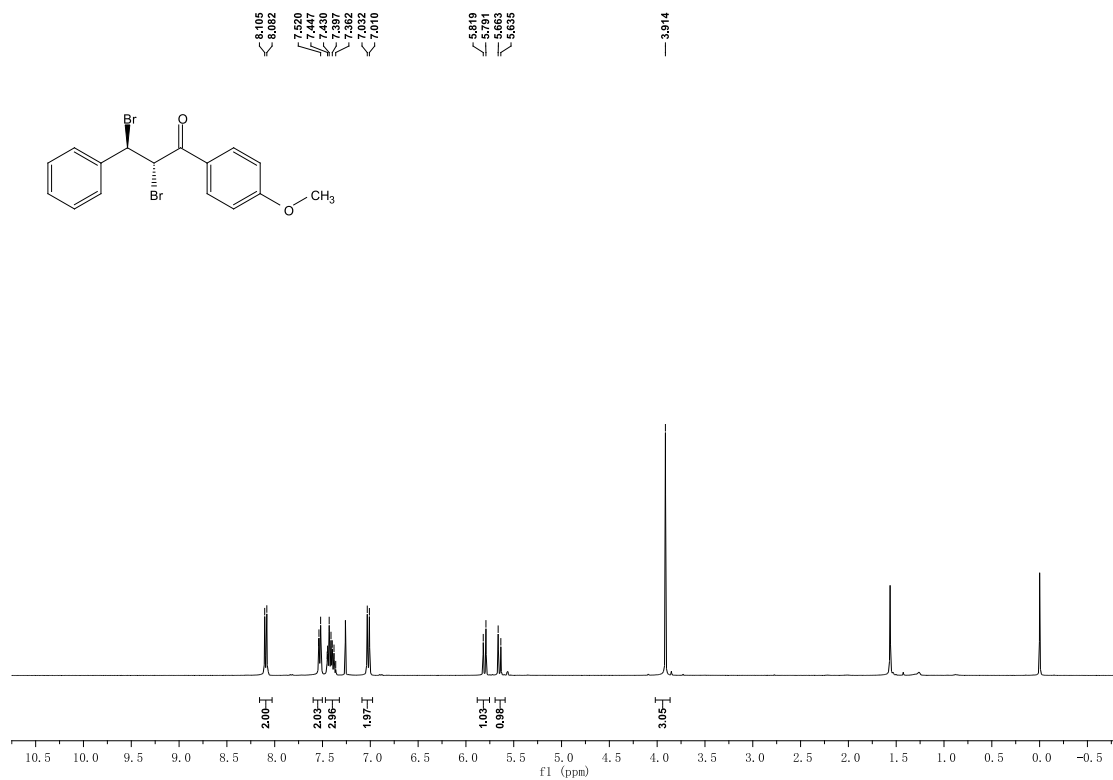

### 2n <sup>13</sup>C NMR

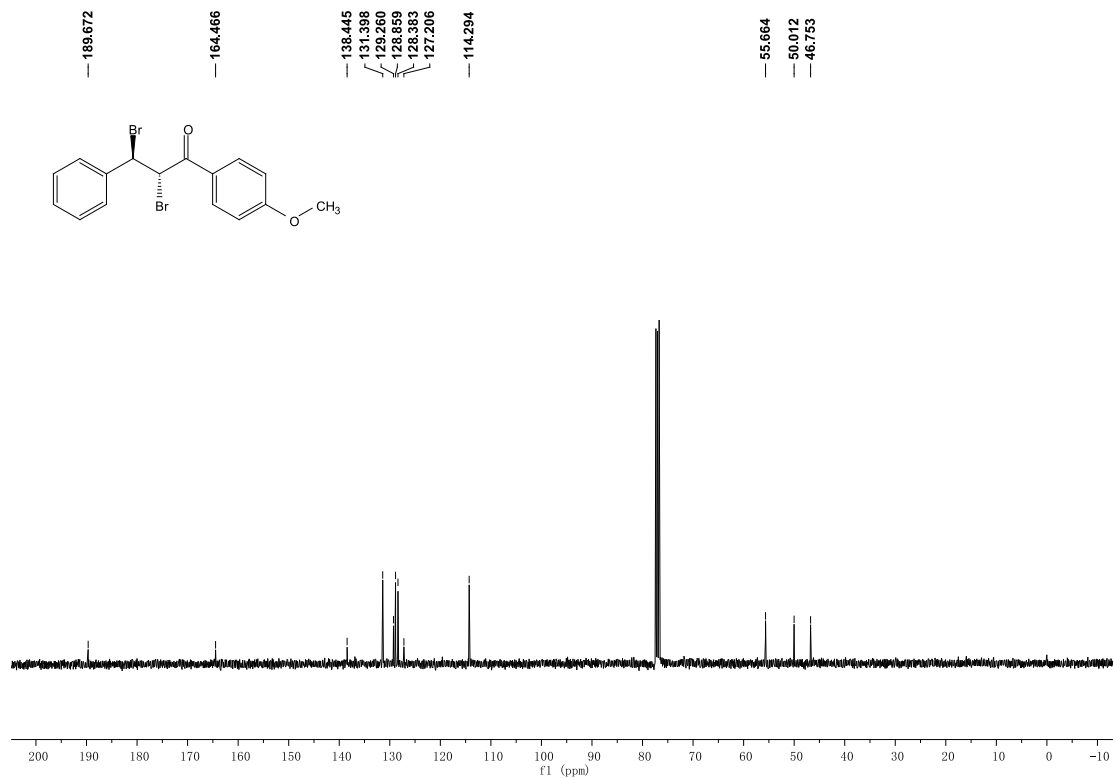

### 2o <sup>1</sup>H NMR

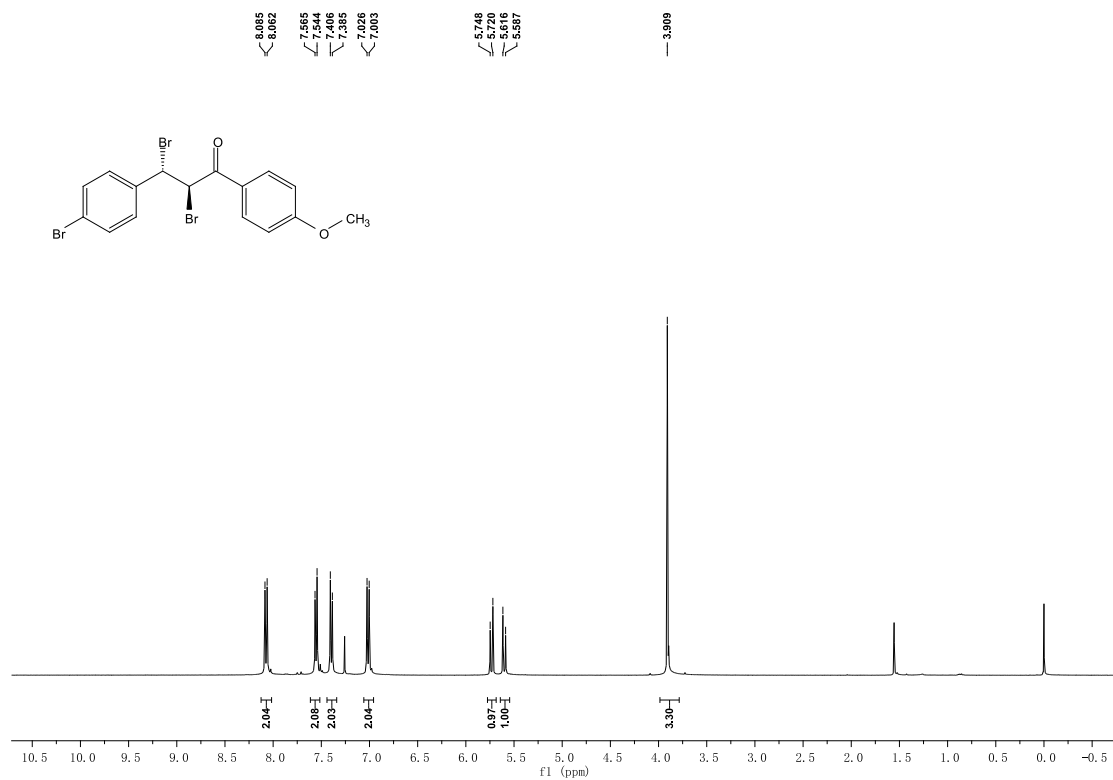

### 2o <sup>13</sup>C NMR

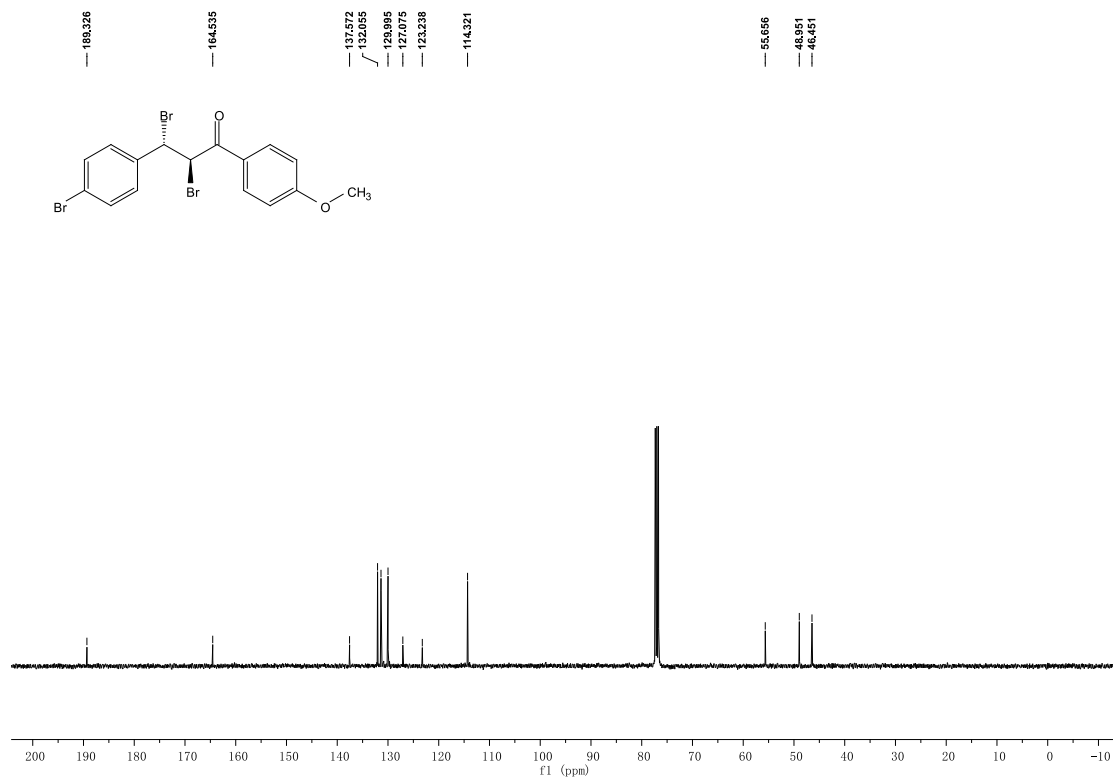

2p <sup>1</sup>H NMR

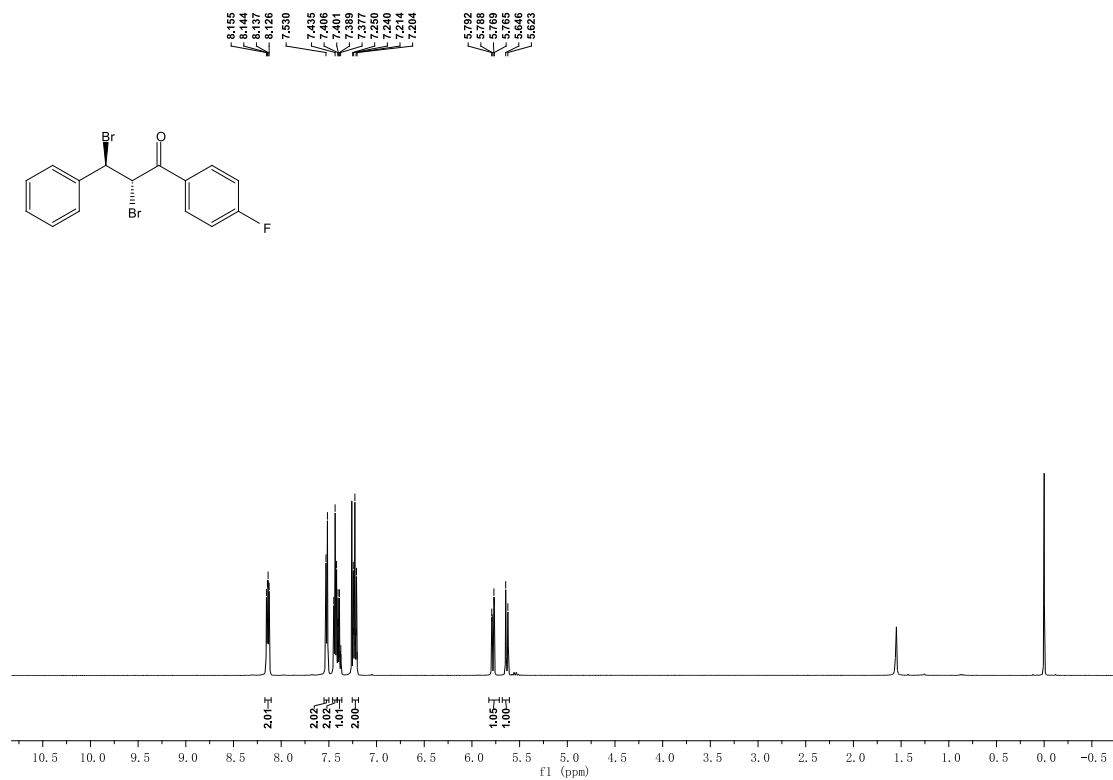

2p <sup>13</sup>C NMR

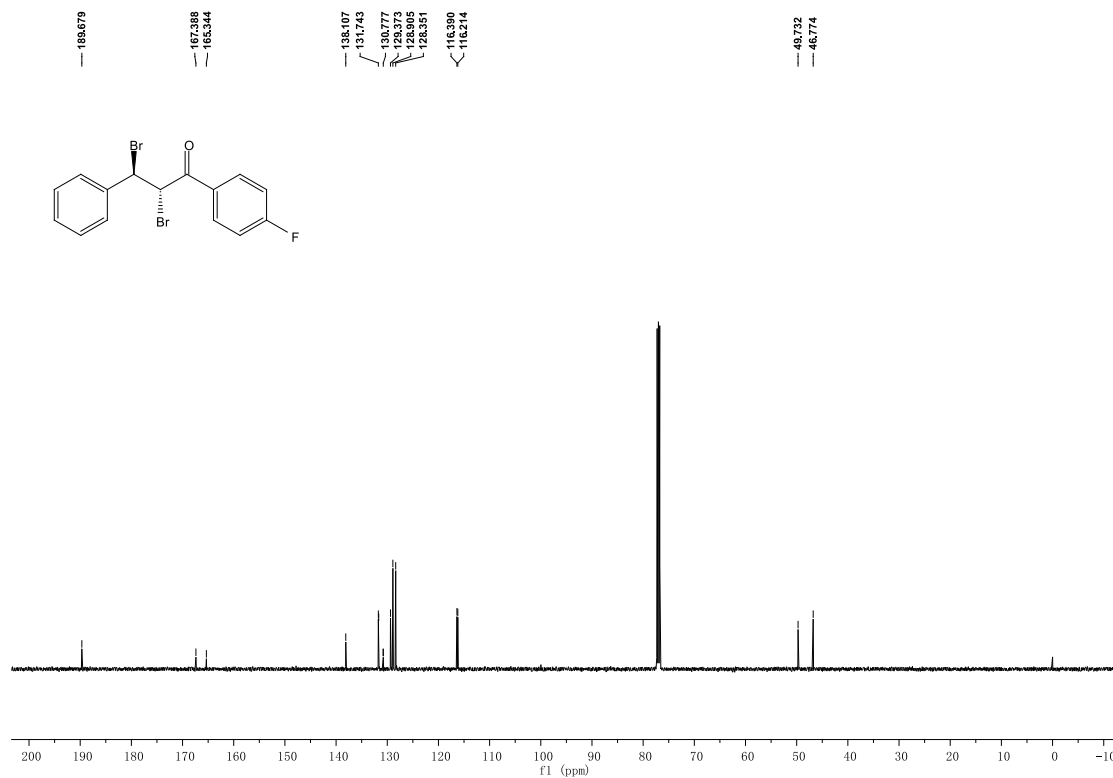

## 2p $^{19}\text{F}$ NMR

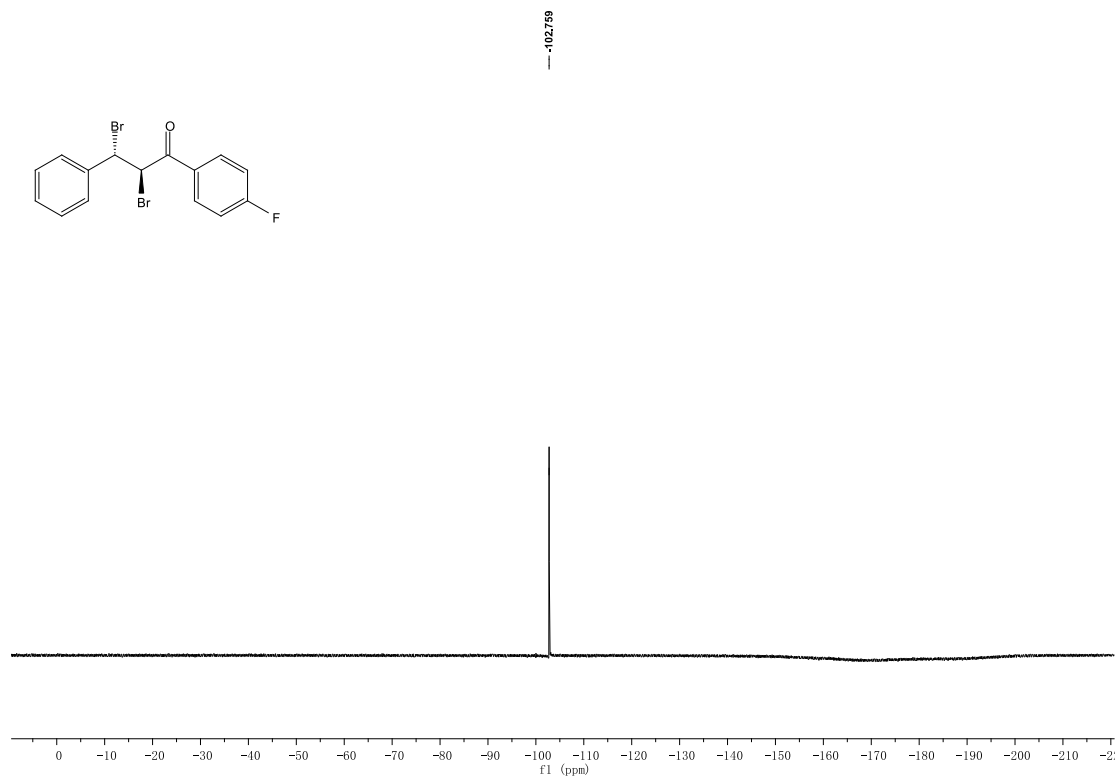

## 2q $^1\text{H}$ NMR

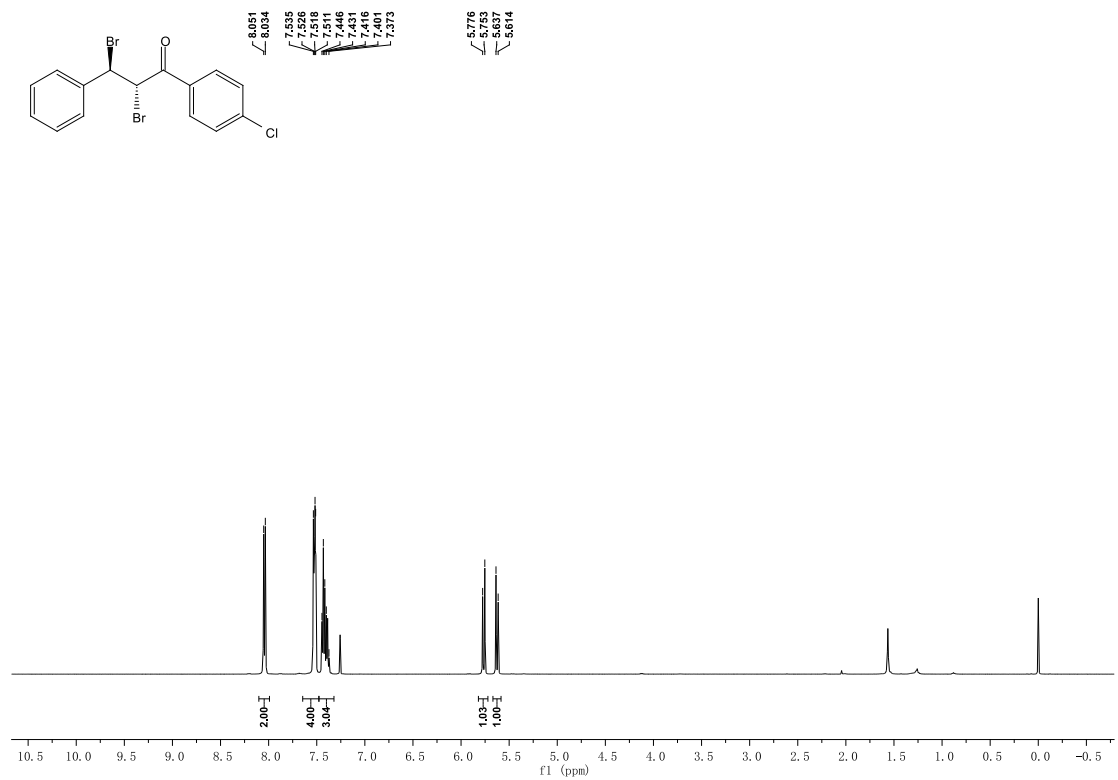

## 2q <sup>13</sup>C NMR

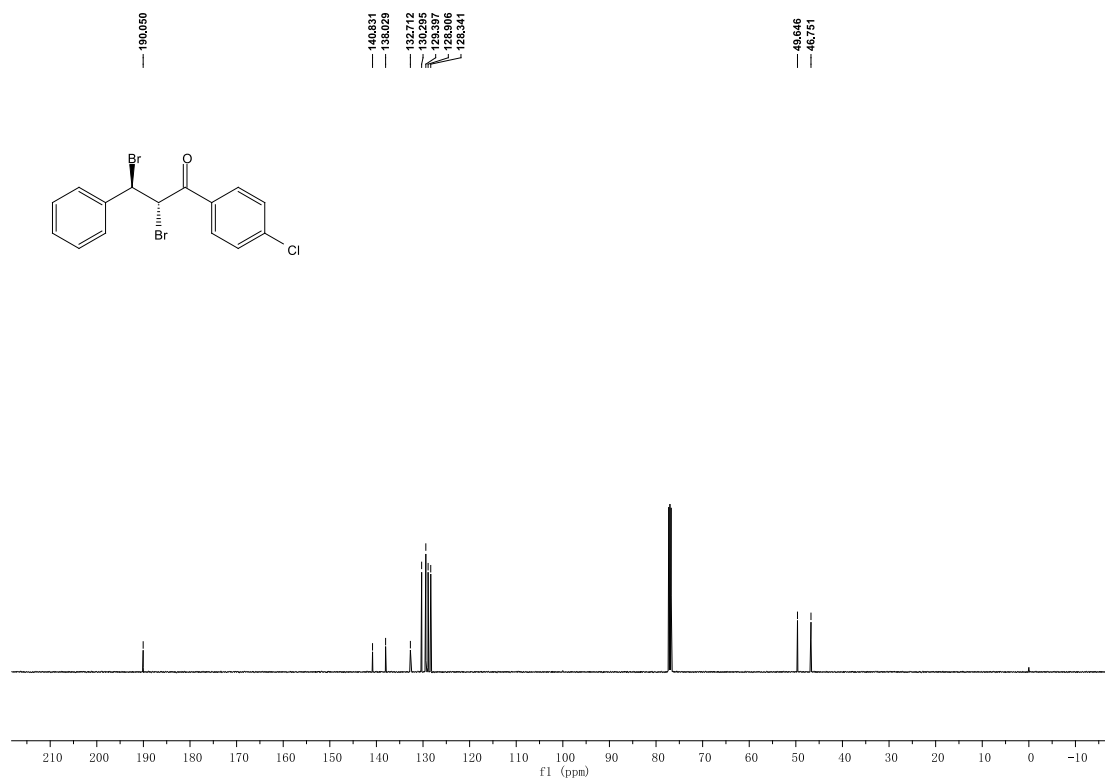

## 2r <sup>1</sup>H NMR

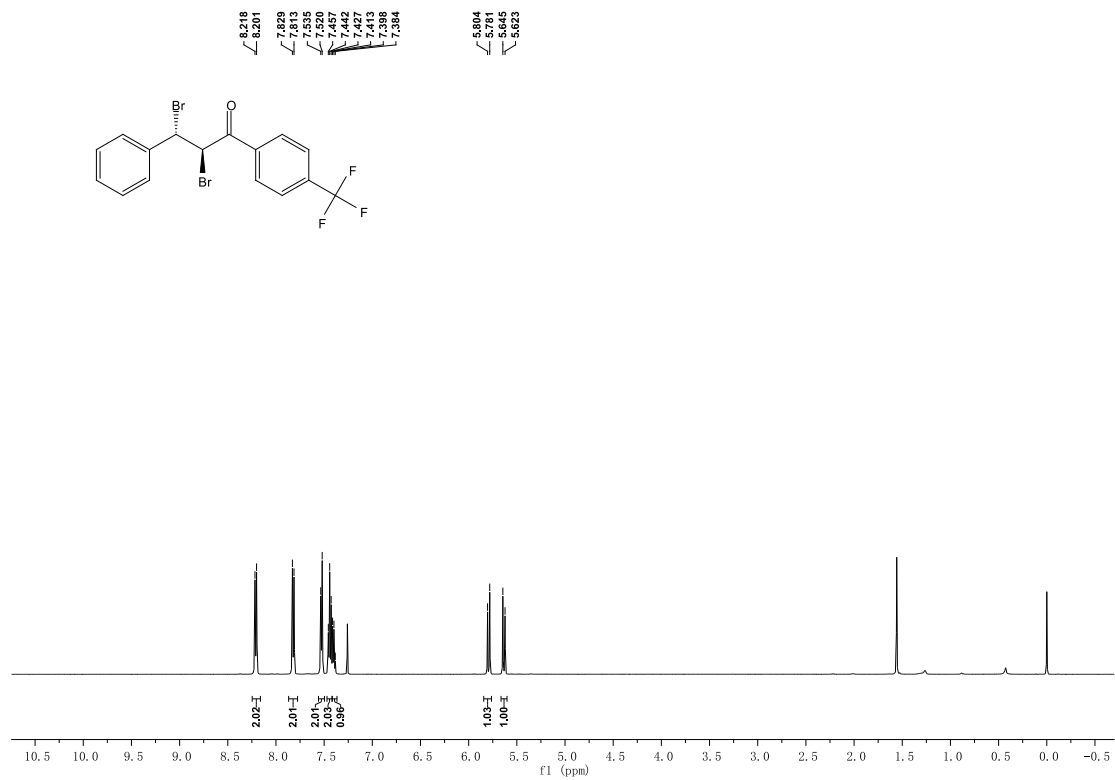

### 2r <sup>13</sup>C NMR

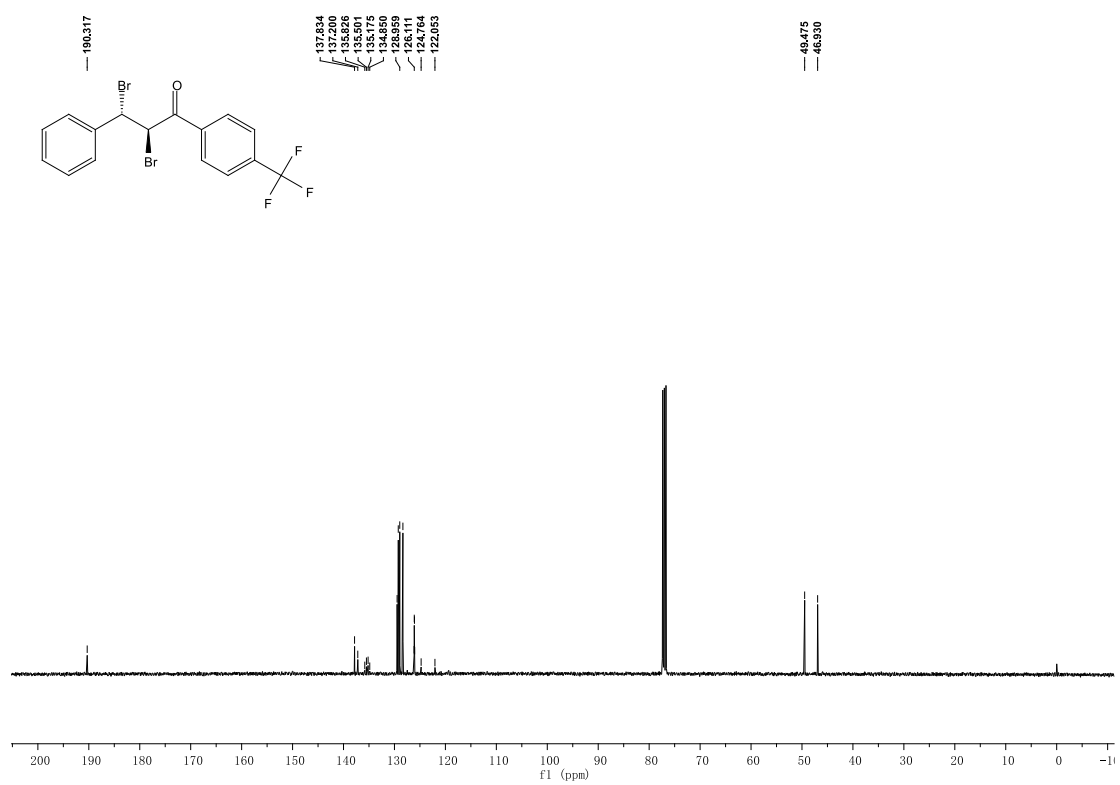

### 2r <sup>19</sup>F NMR

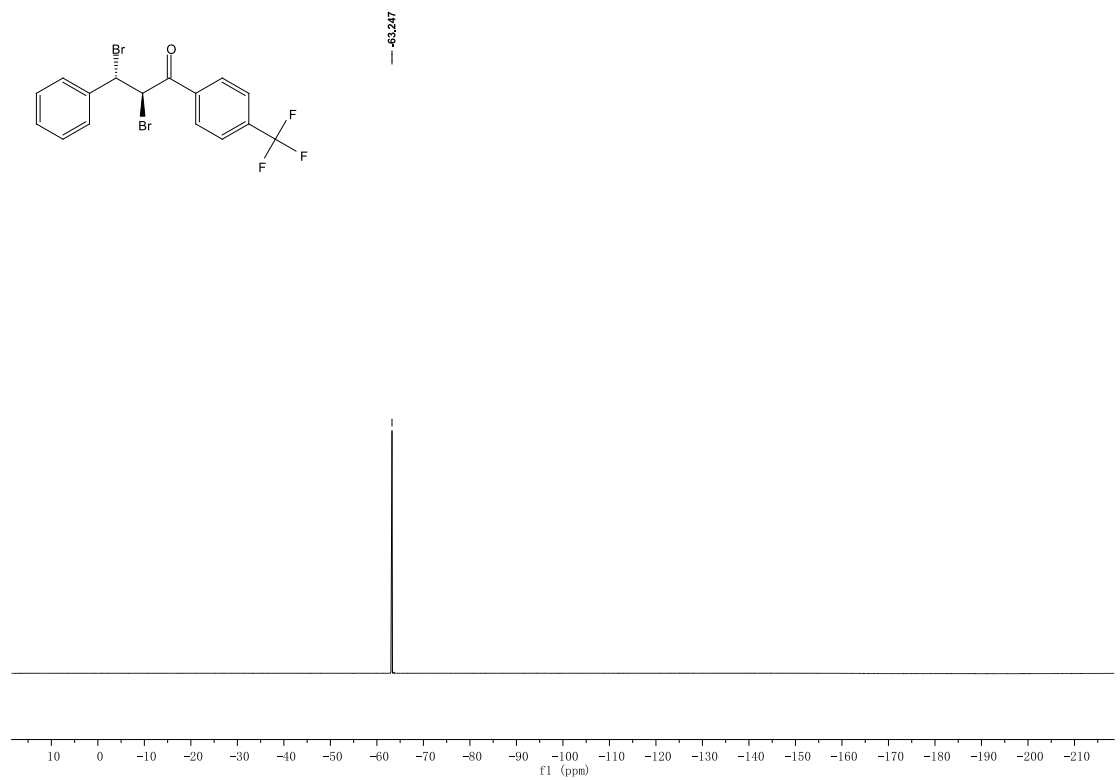

2s <sup>1</sup>H NMR

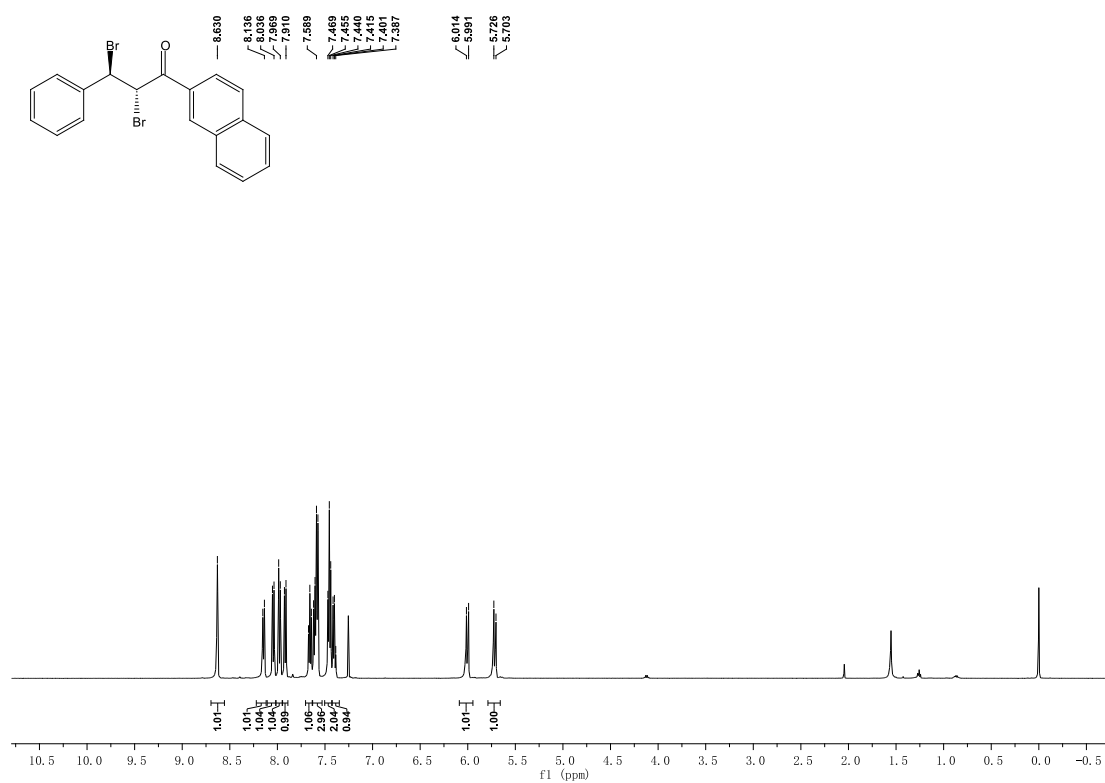

2s <sup>13</sup>C NMR

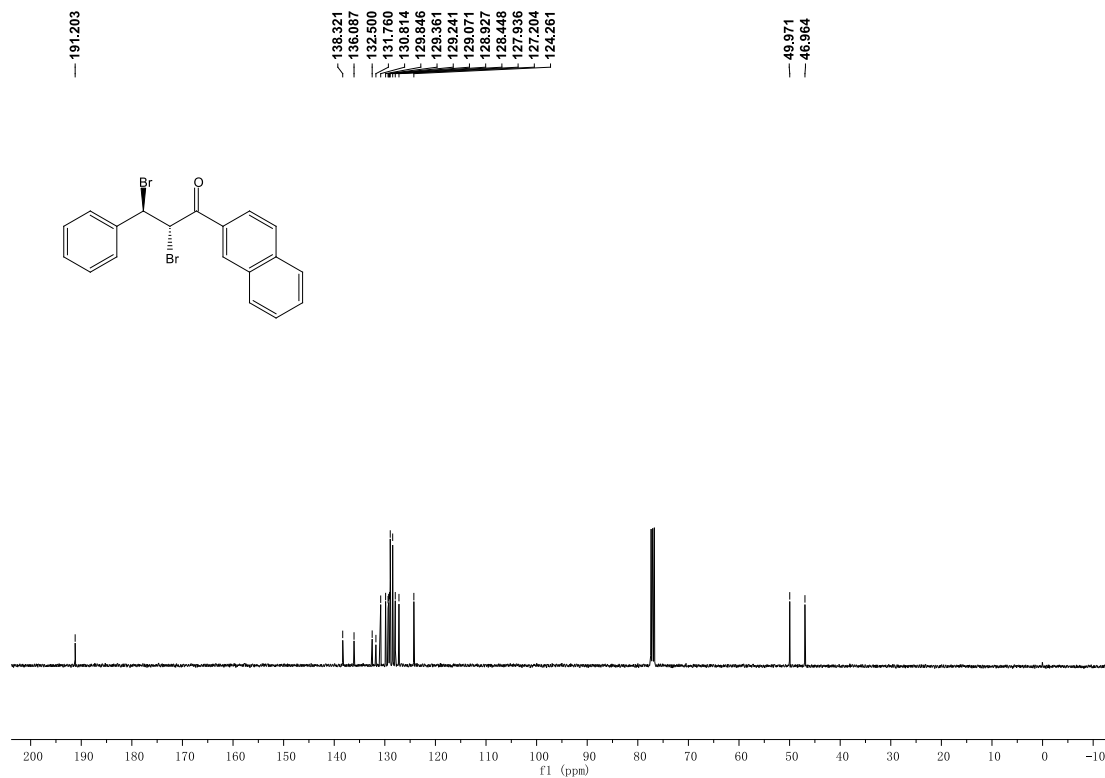

2t <sup>1</sup>H NMR

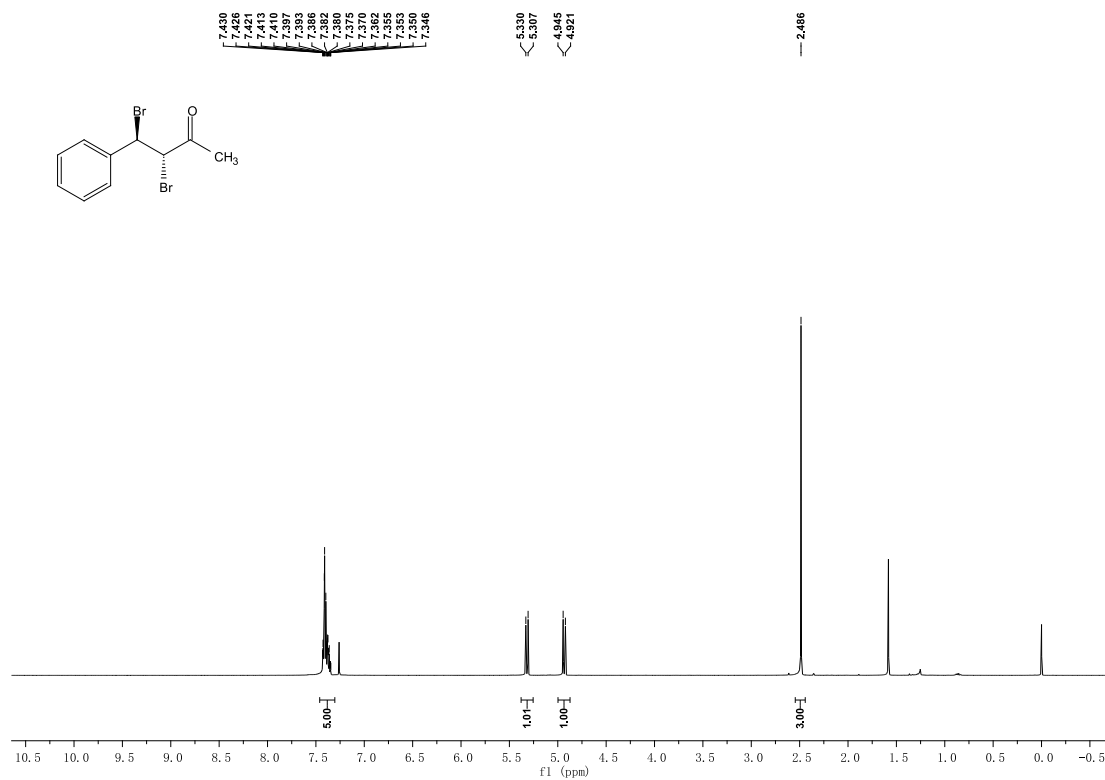

2t <sup>13</sup>C NMR

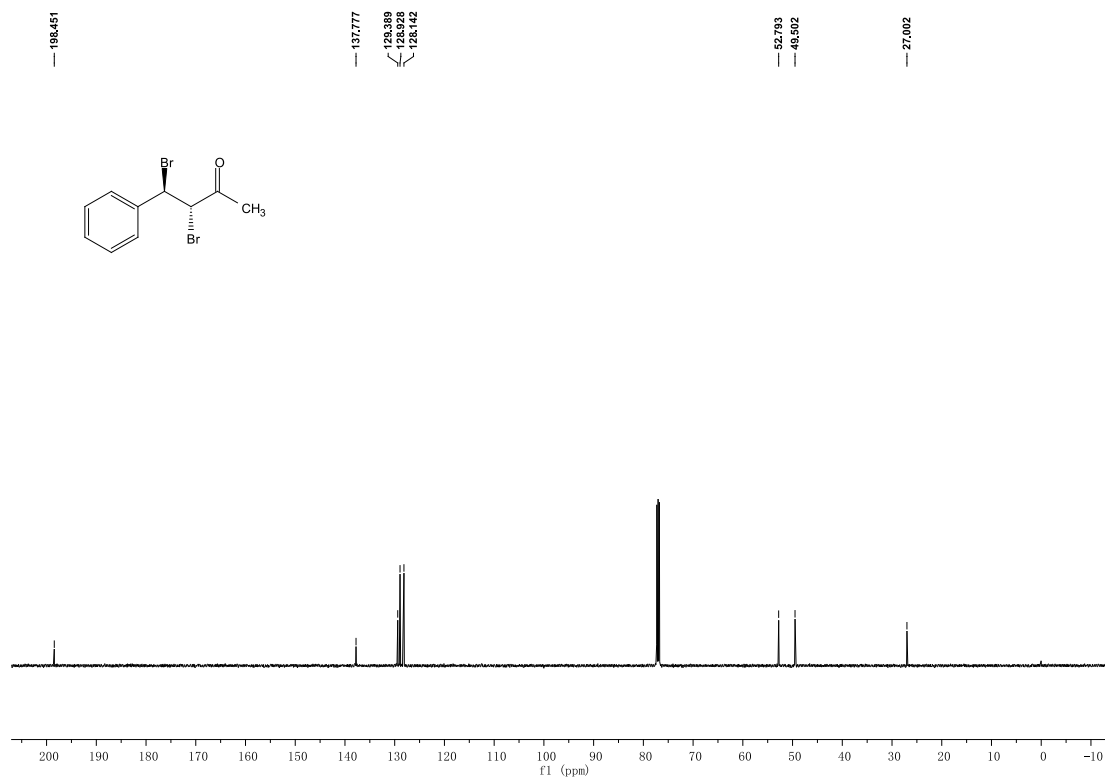



### 2u <sup>1</sup>H NMR

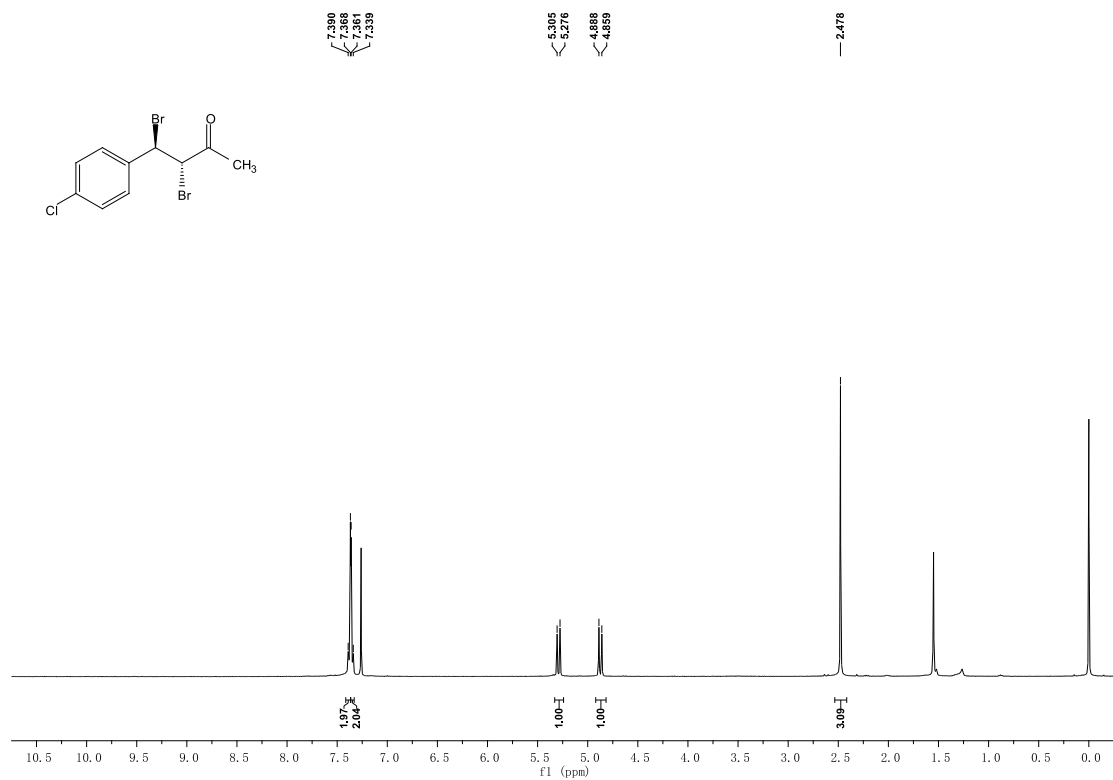

### 2u <sup>13</sup>C NMR

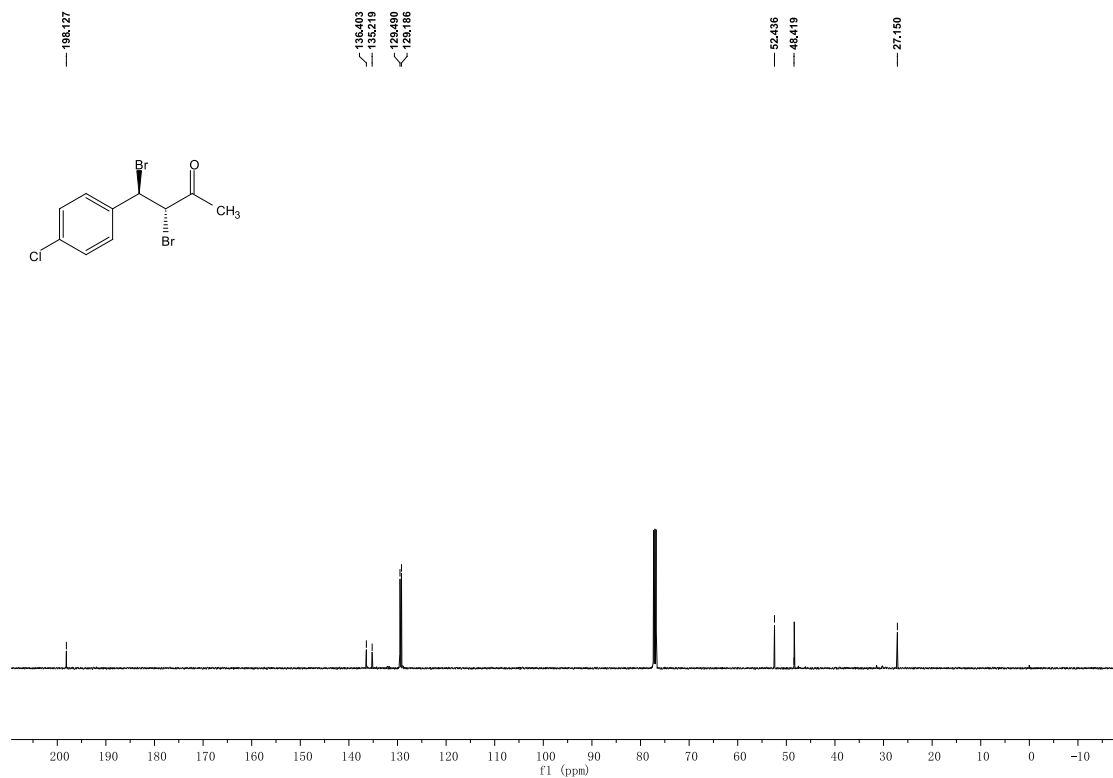

### 2v <sup>1</sup>H NMR

7.689  
7.687  
7.641  
7.419  
7.257  
6.984  
6.983  
5.510  
5.486  
5.240  
5.217

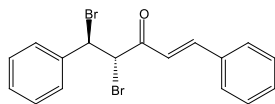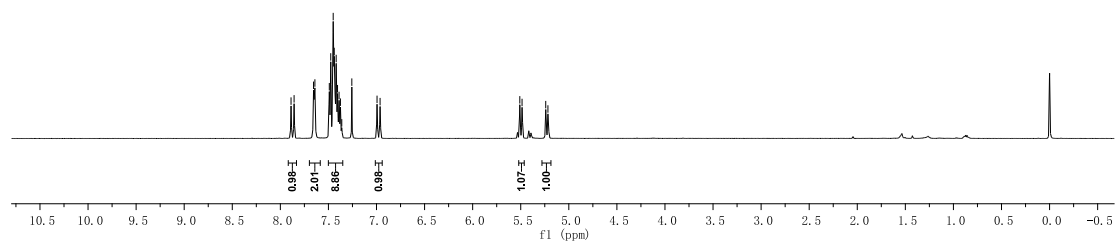

### 2v <sup>13</sup>C NMR

189.883  
146.131  
138.200  
129.099  
128.254  
122.121  
51.613  
49.488

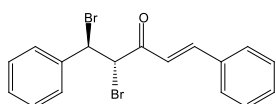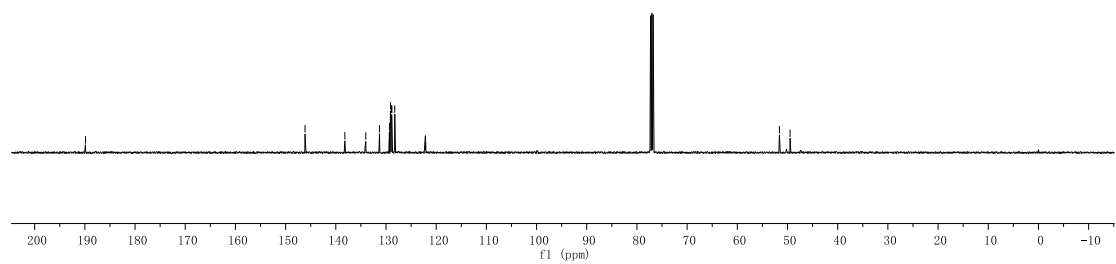

### 2w <sup>1</sup>H NMR

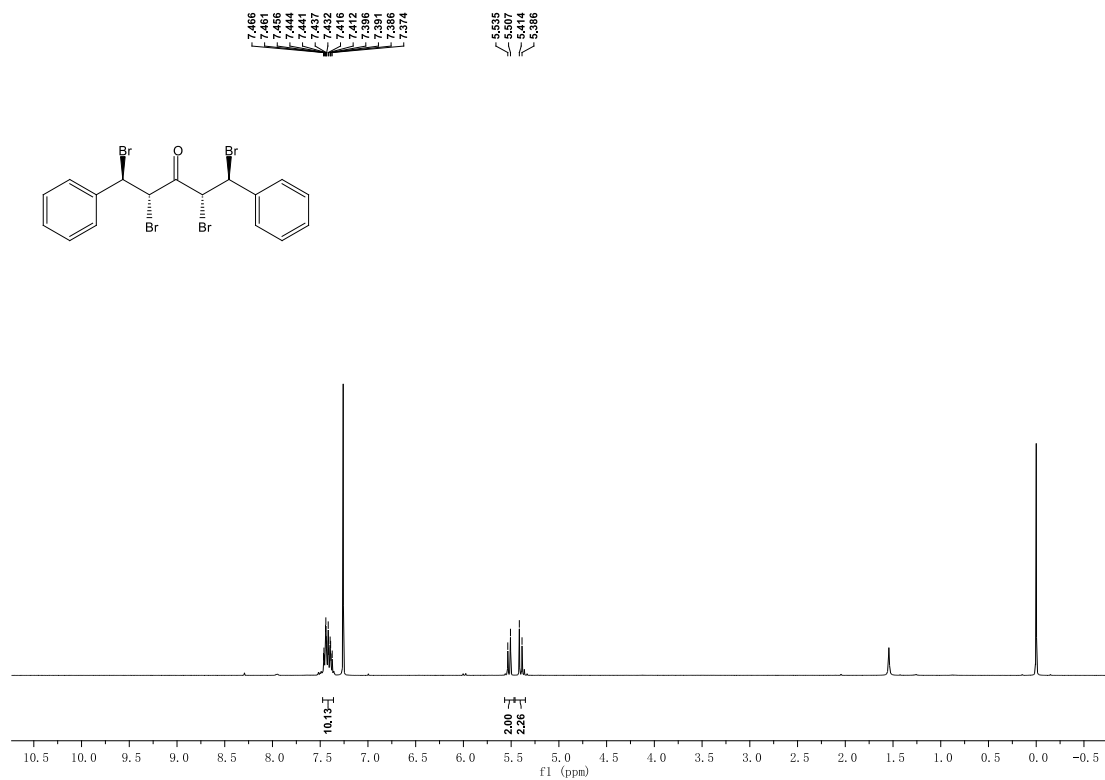

### 2w <sup>13</sup>C NMR

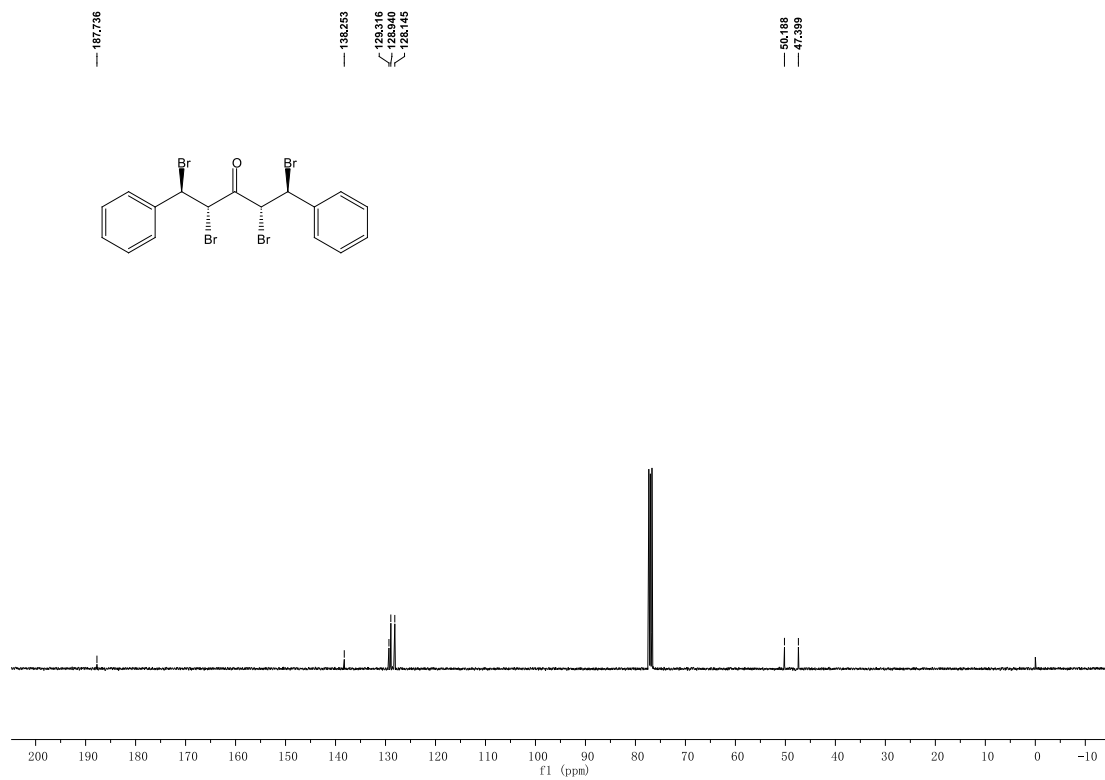

### 4a <sup>1</sup>H NMR

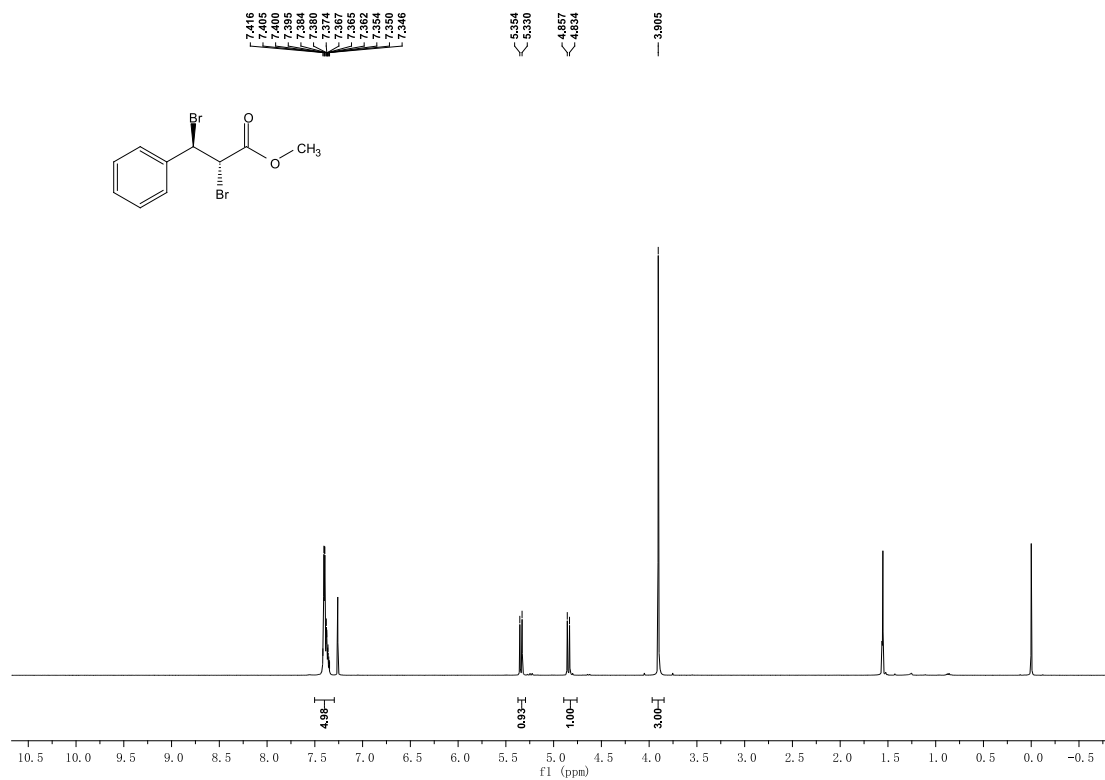

### 4a <sup>13</sup>C NMR

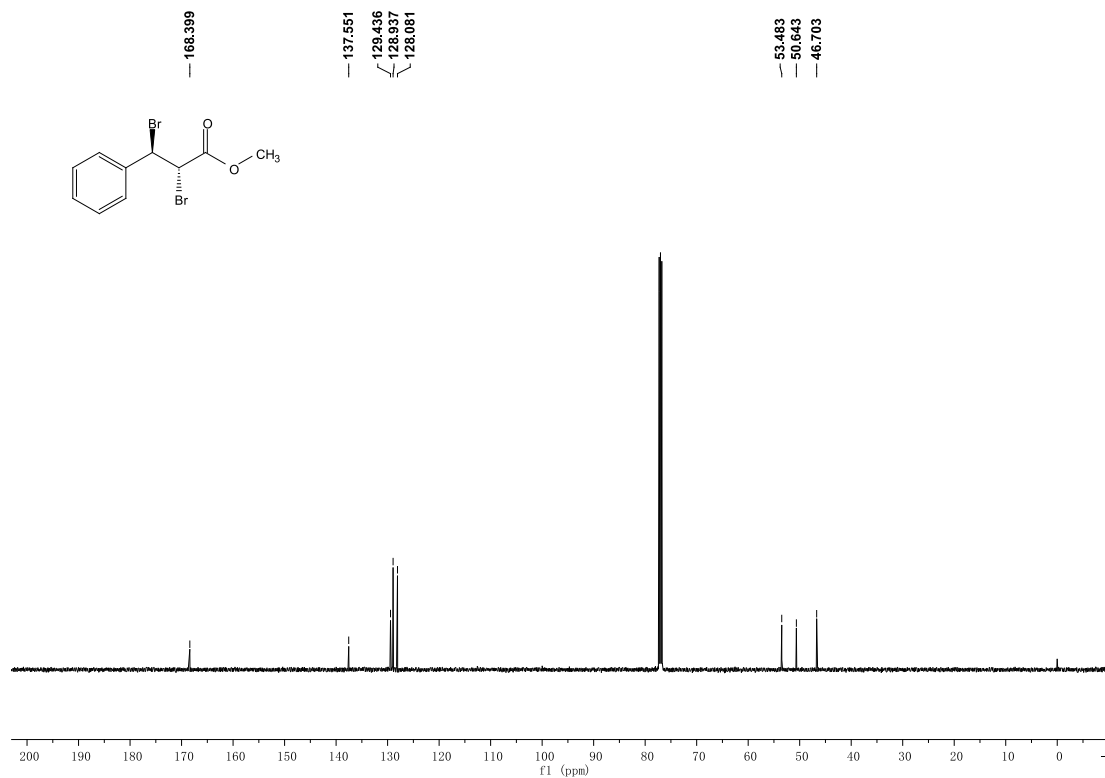

### 4b <sup>1</sup>H NMR

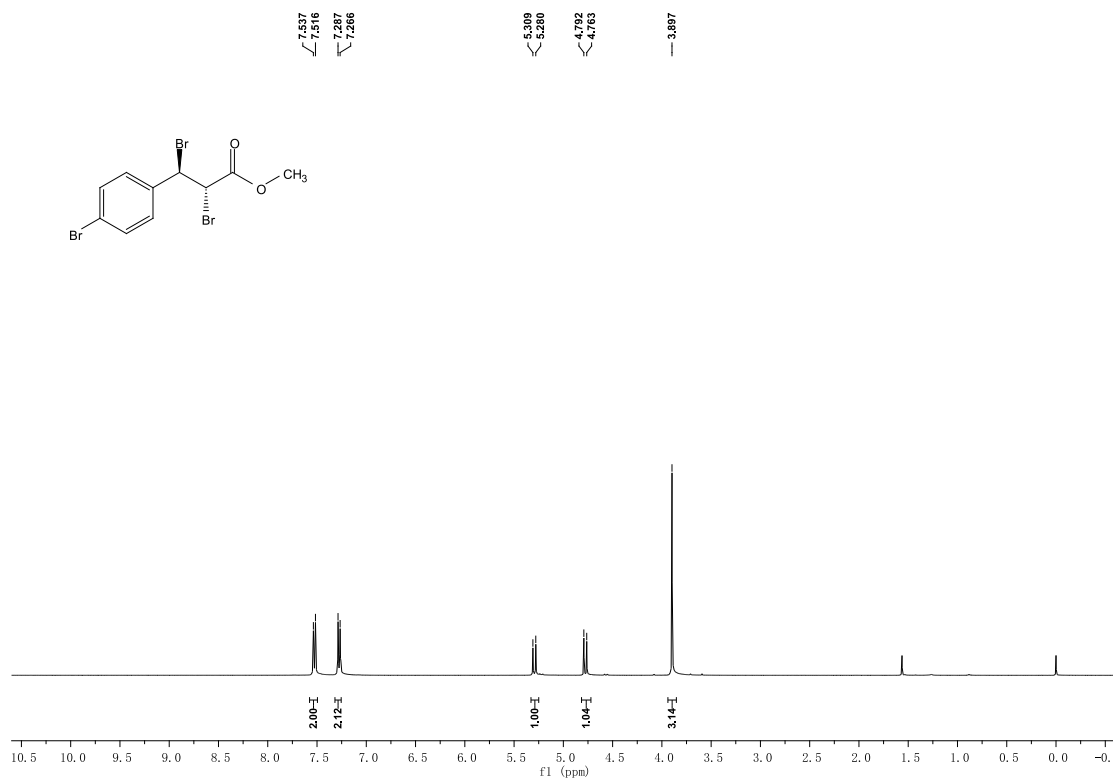

### 4b <sup>13</sup>C NMR

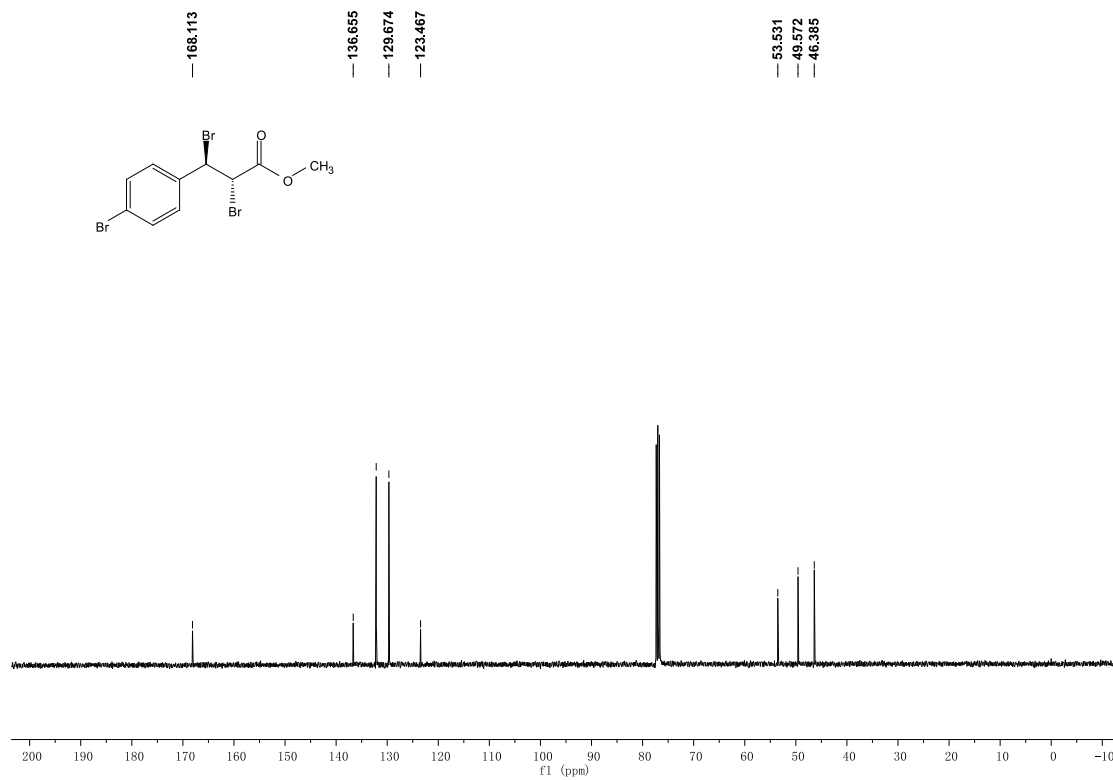

### 4c <sup>1</sup>H NMR

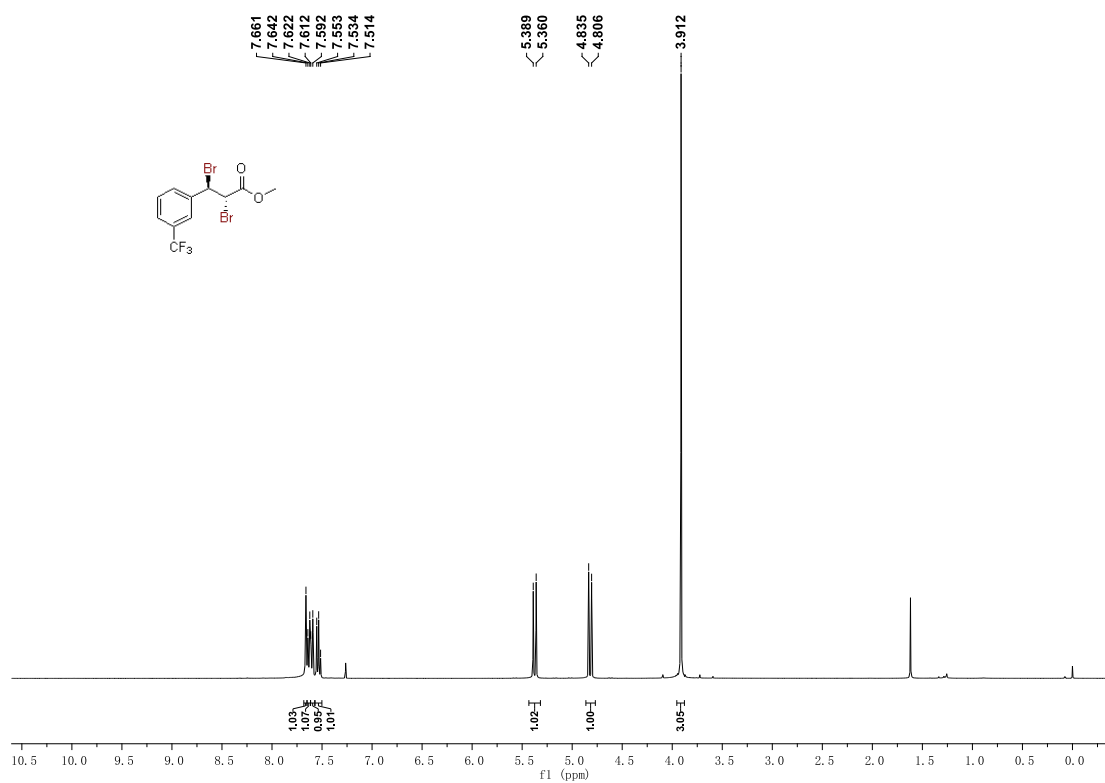

### 4c <sup>13</sup>C NMR

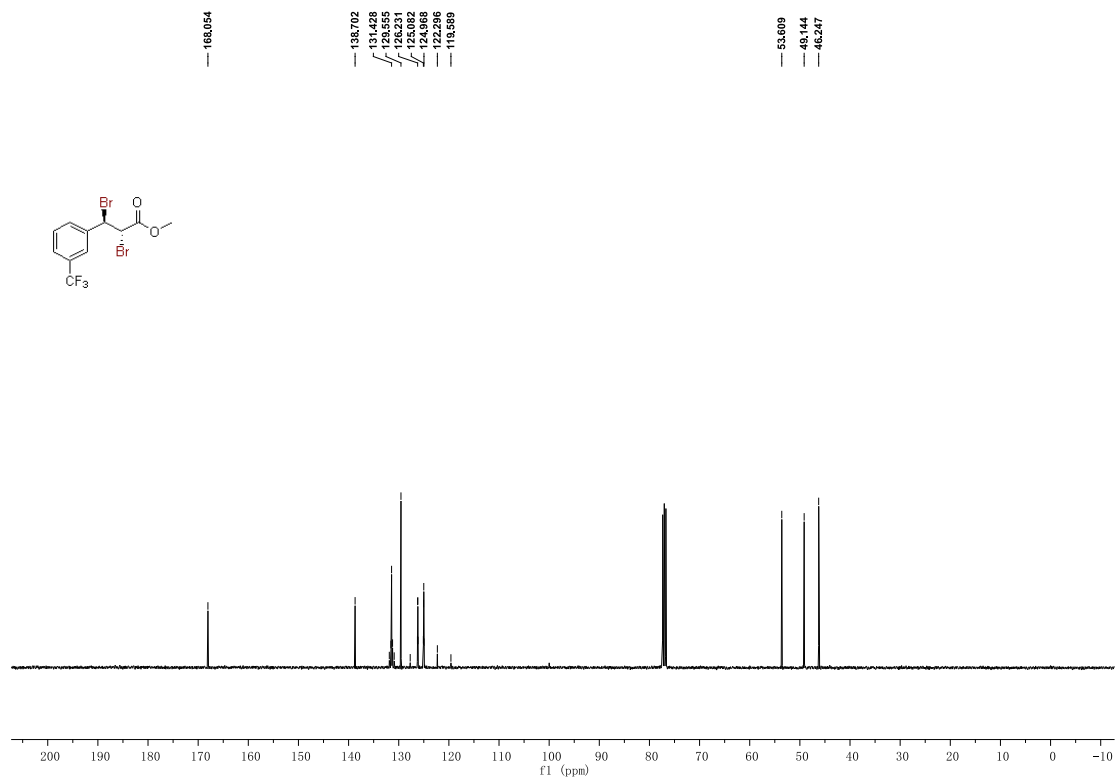

### 4c <sup>19</sup>F NMR

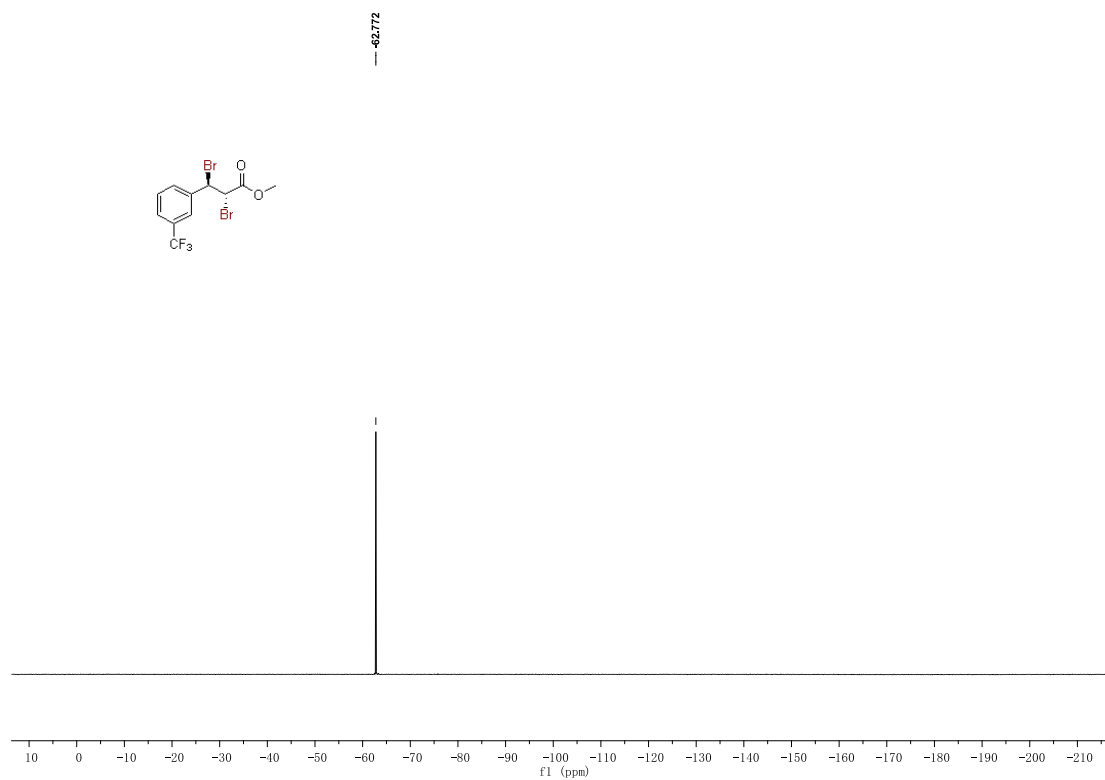

### 4d <sup>1</sup>H NMR

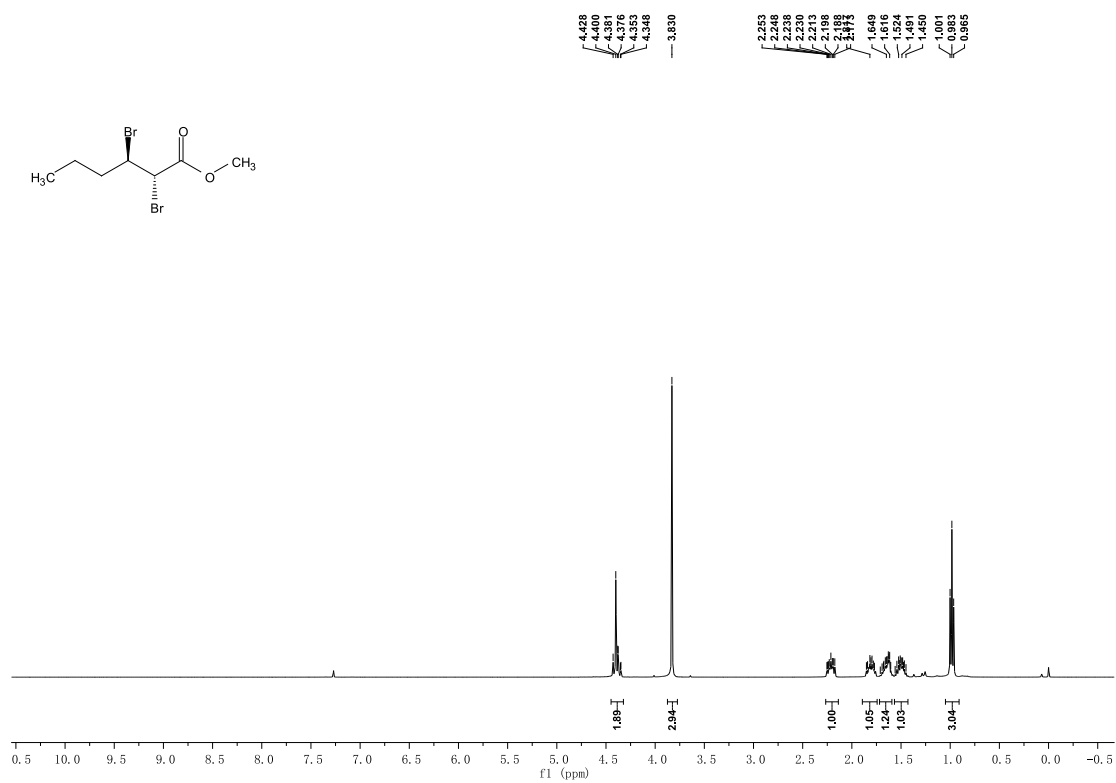

4d <sup>13</sup>C NMR

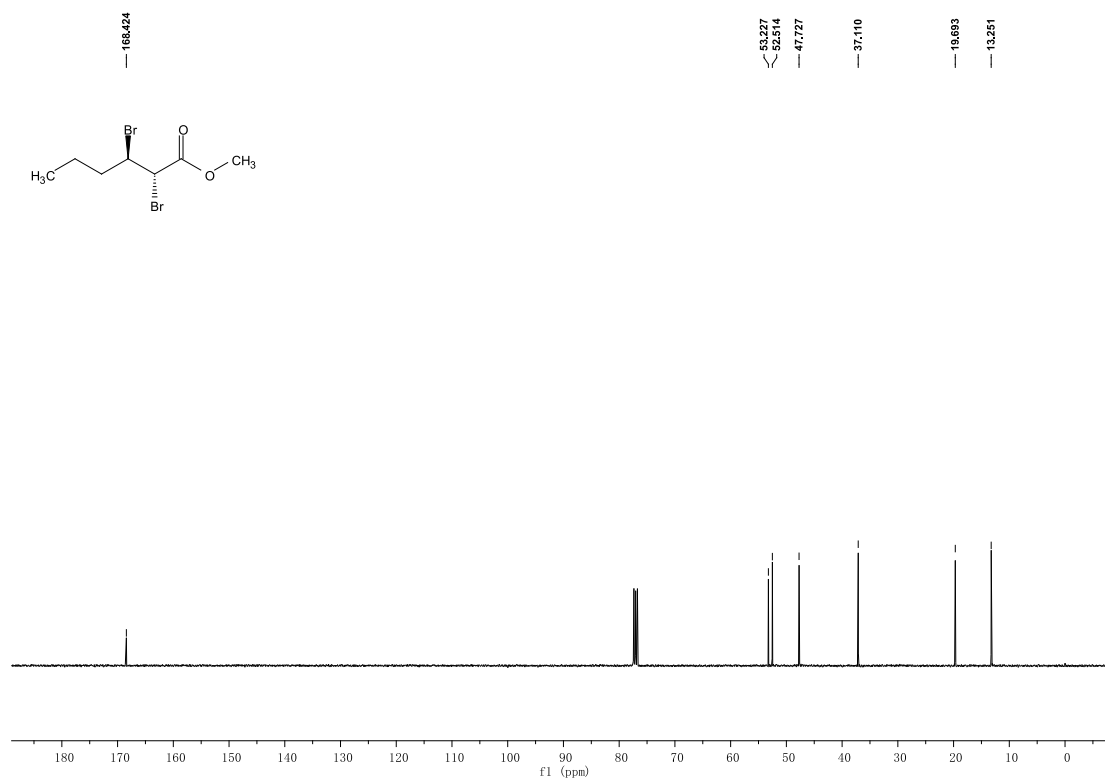

4e <sup>1</sup>H NMR

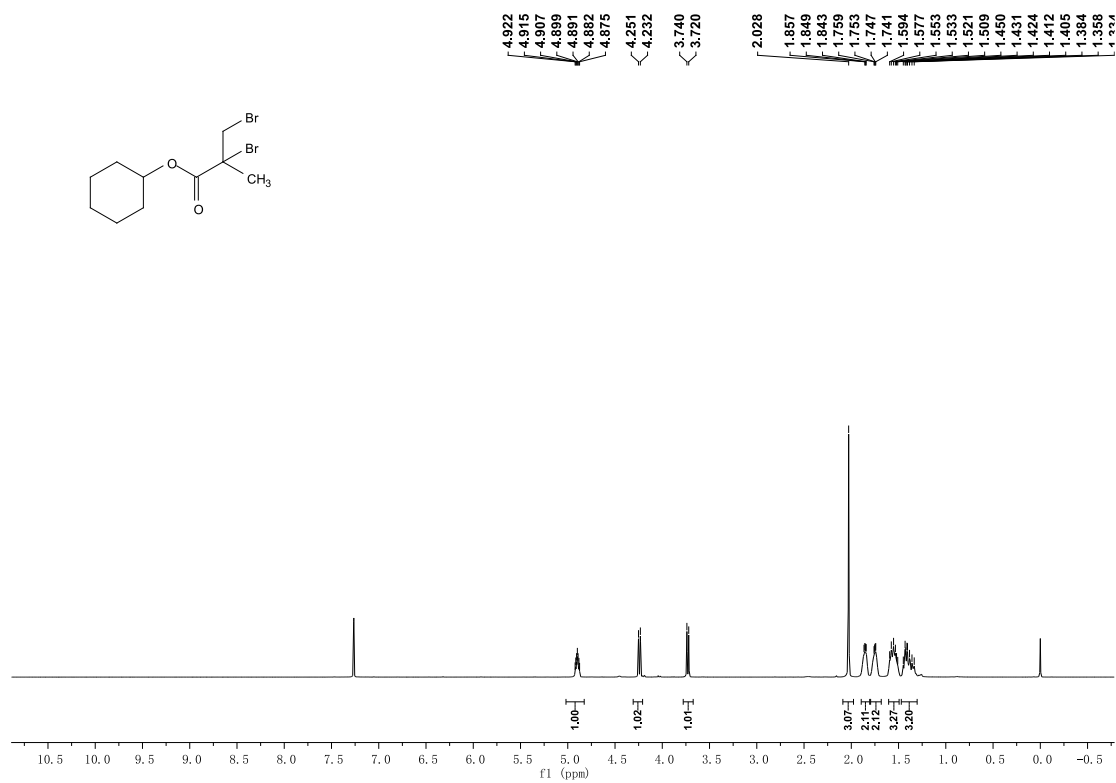



4e <sup>13</sup>C NMR

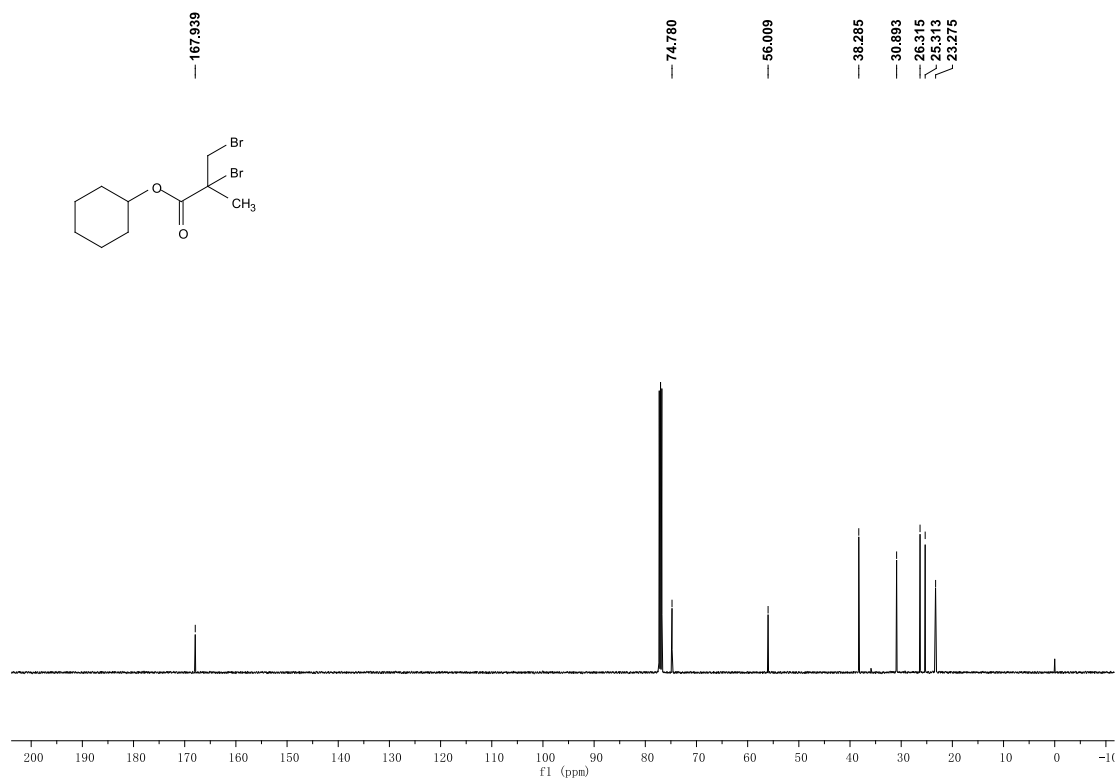

4f <sup>1</sup>H NMR

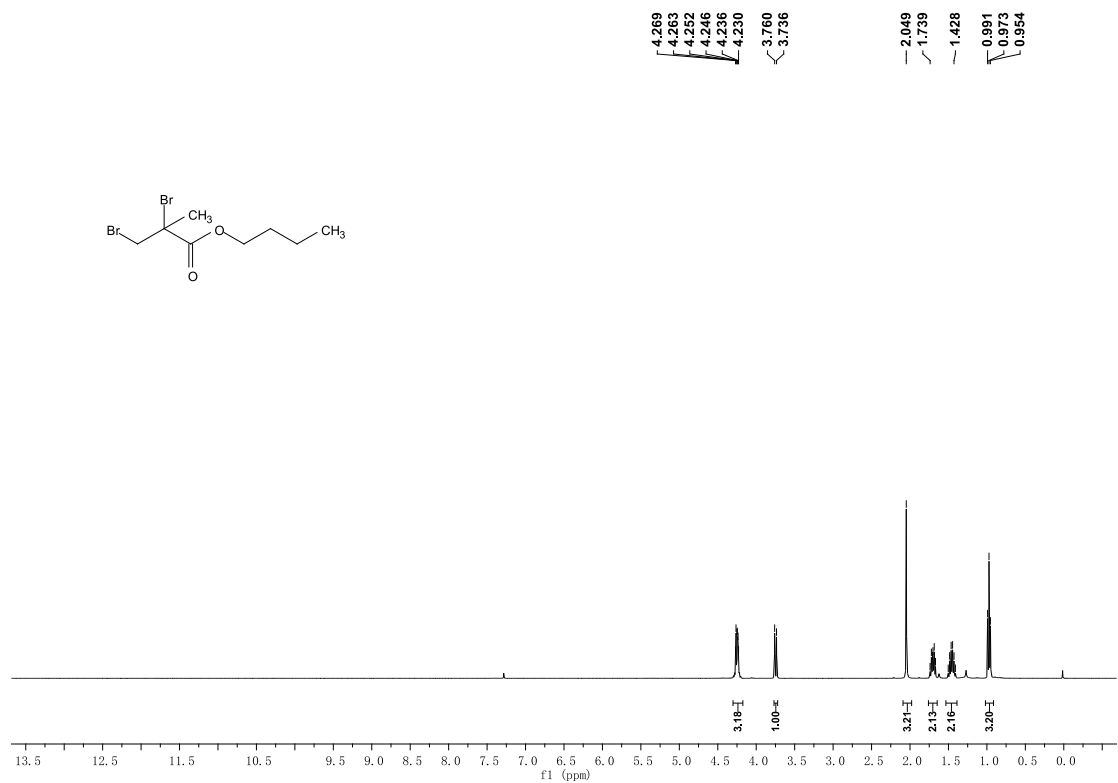

### 4f <sup>13</sup>CNMR

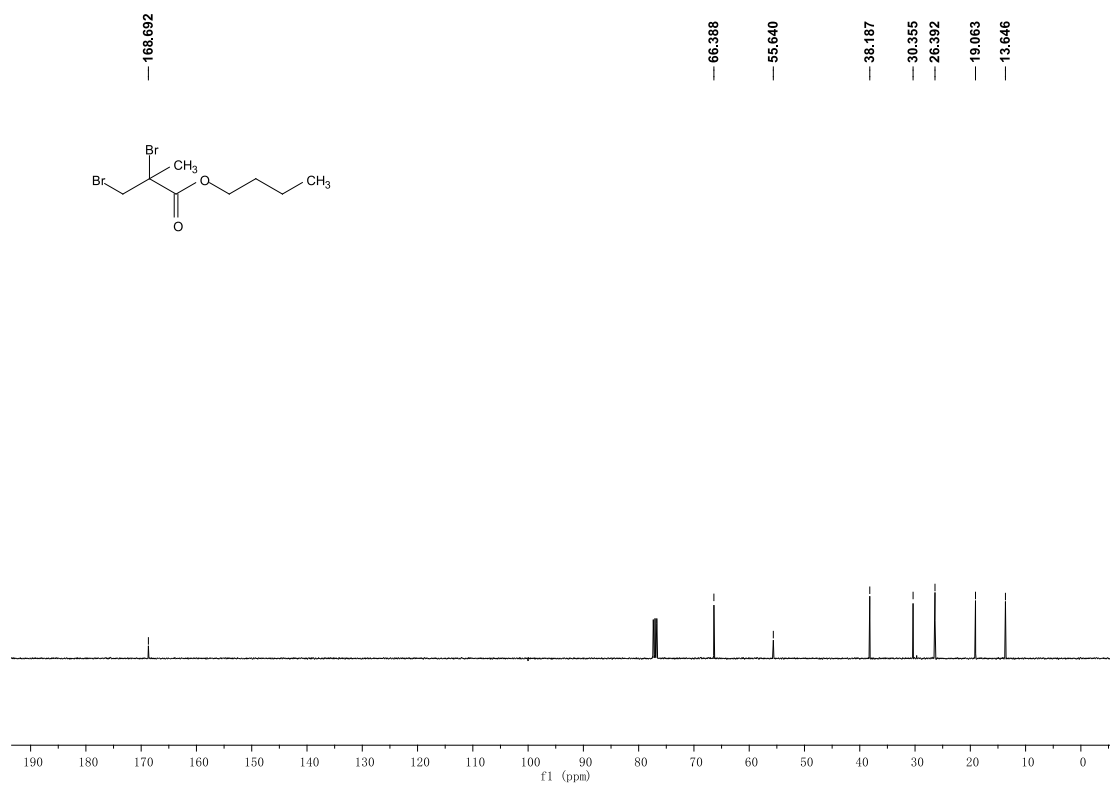

### 4g <sup>1</sup>H NMR

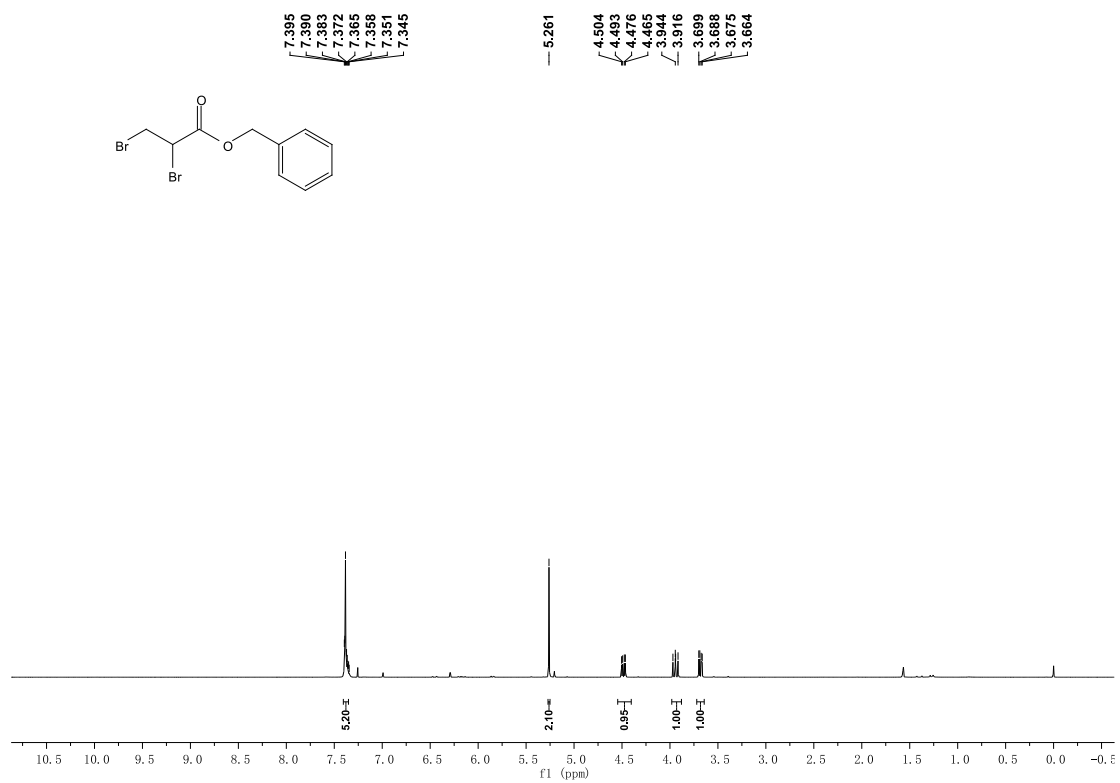

4g <sup>13</sup>C NMR

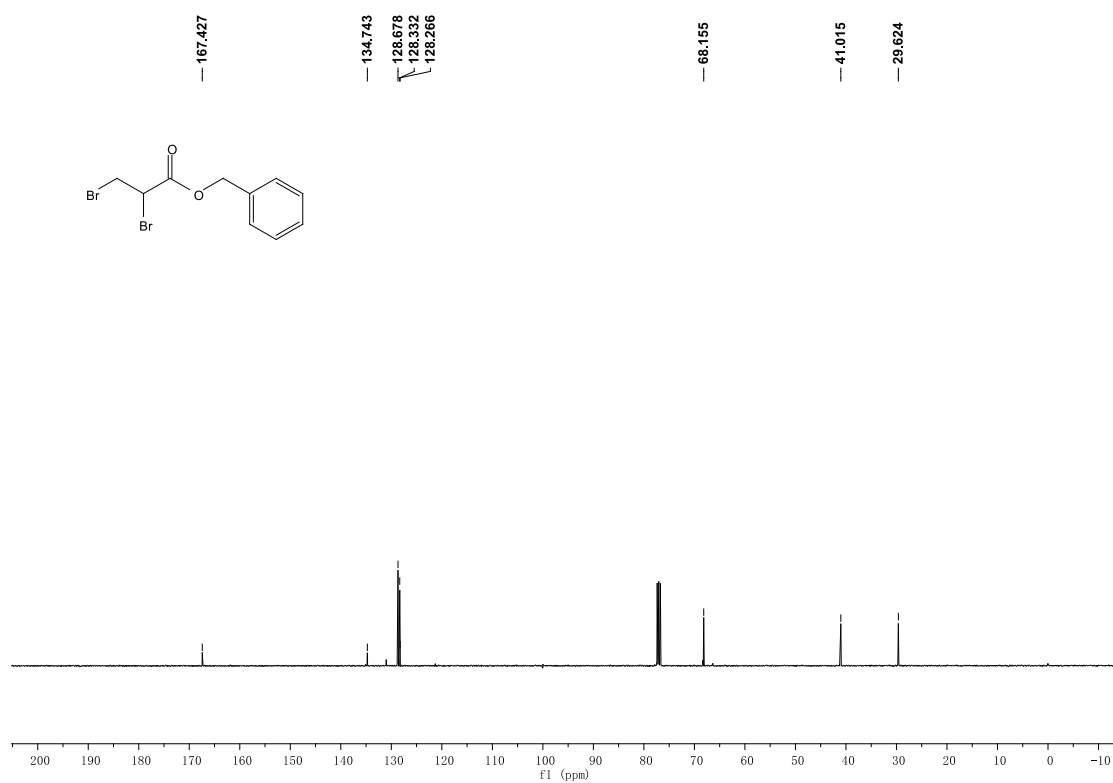

4h <sup>1</sup>H NMR

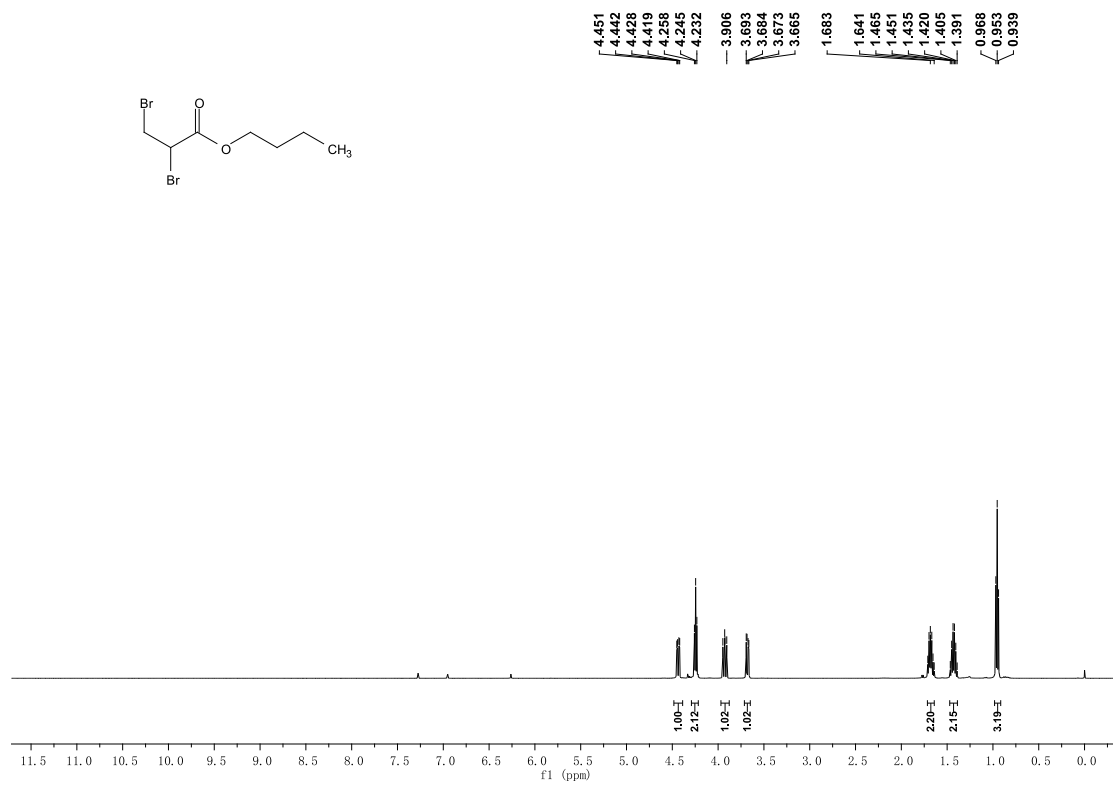

### 4h <sup>13</sup>C NMR

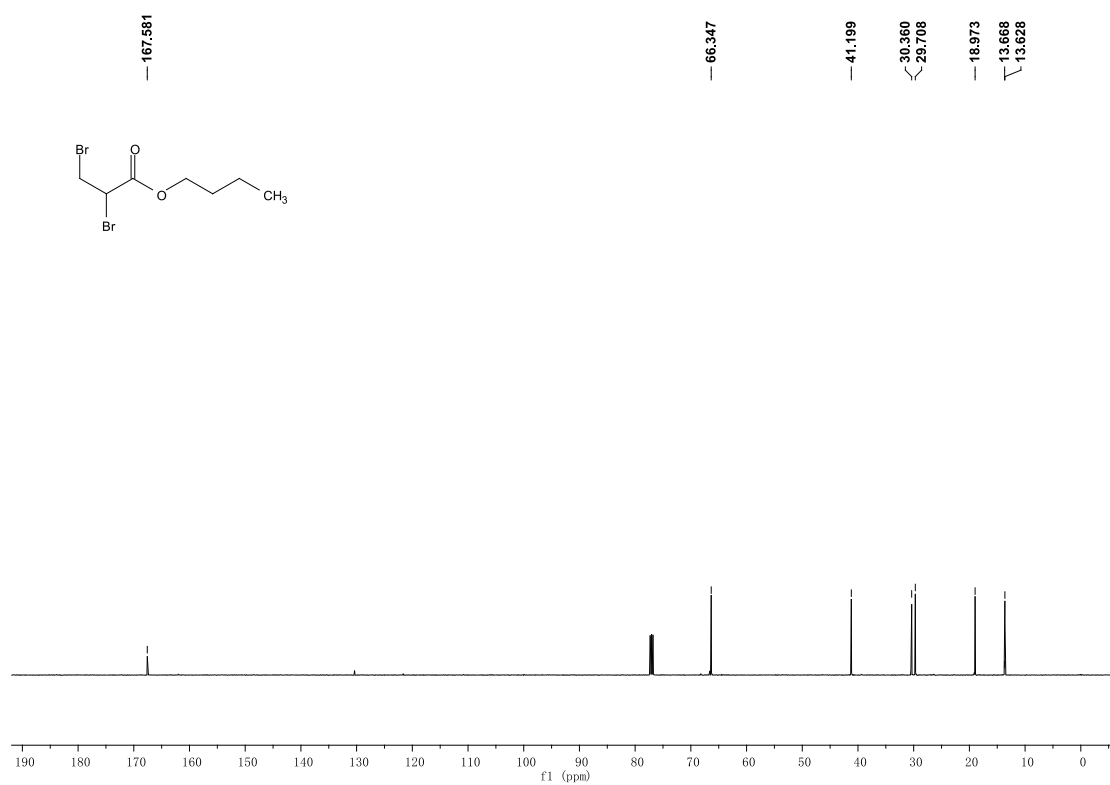

### 4i <sup>1</sup>H NMR

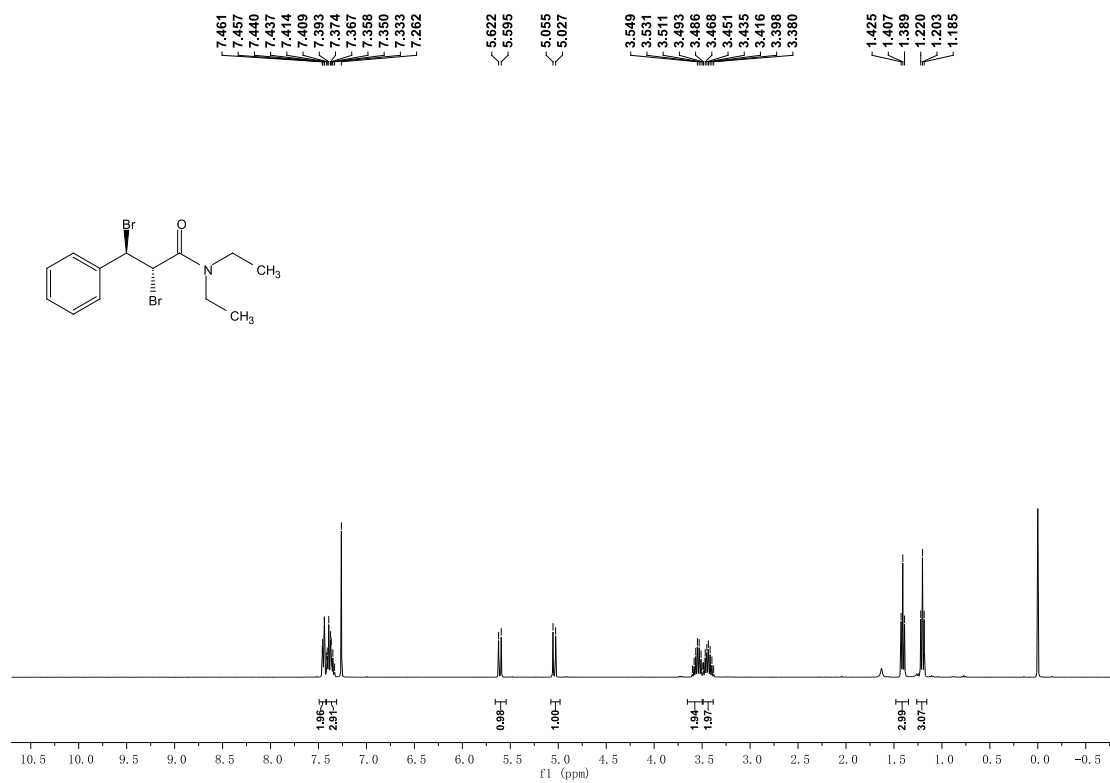

### 4i <sup>13</sup>C NMR

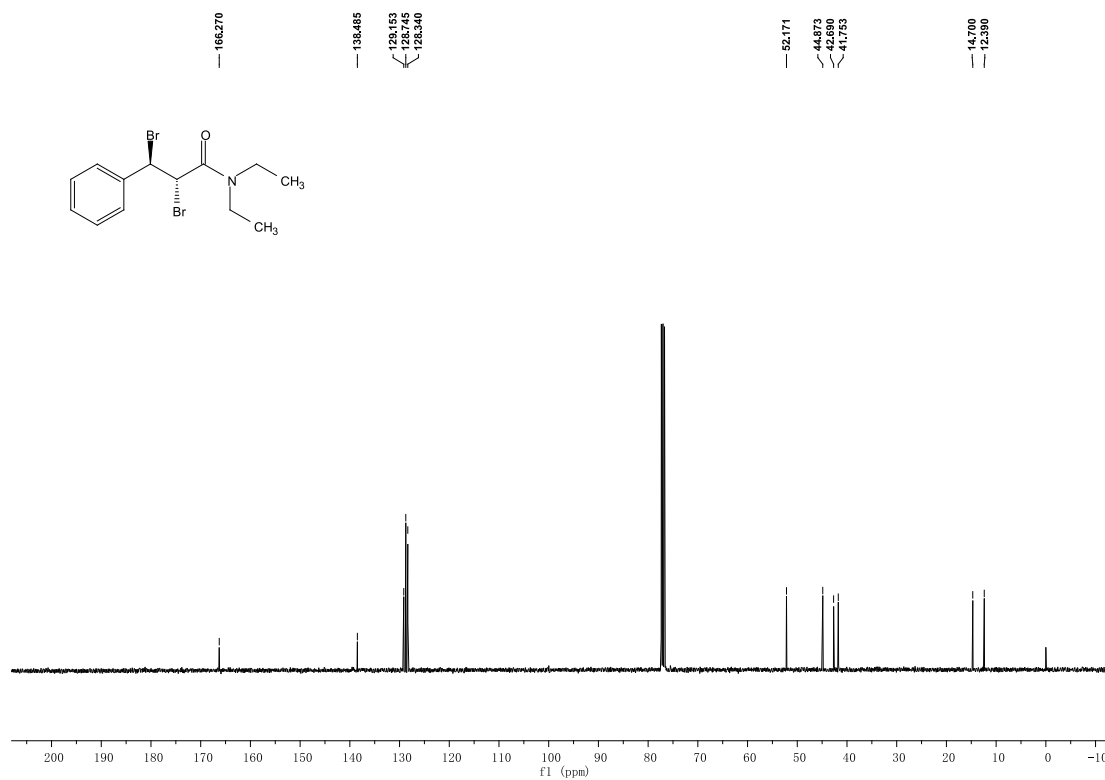

### 4j <sup>1</sup>H NMR

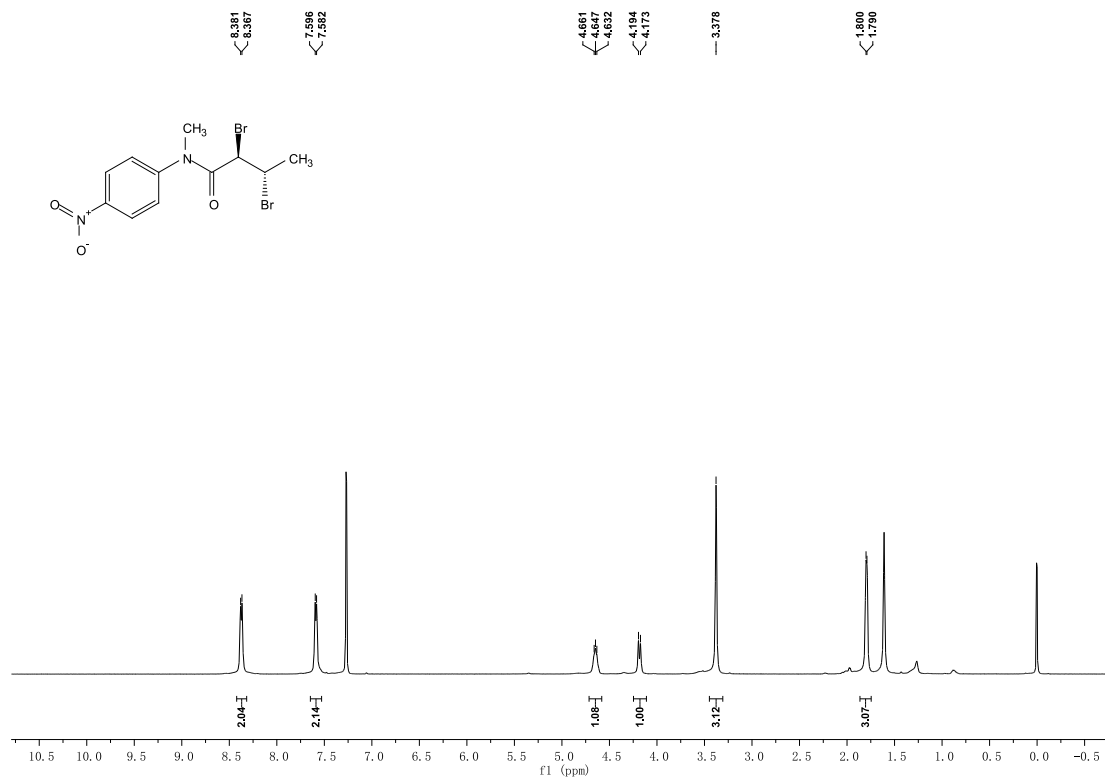

### 4j <sup>1</sup>H NMR

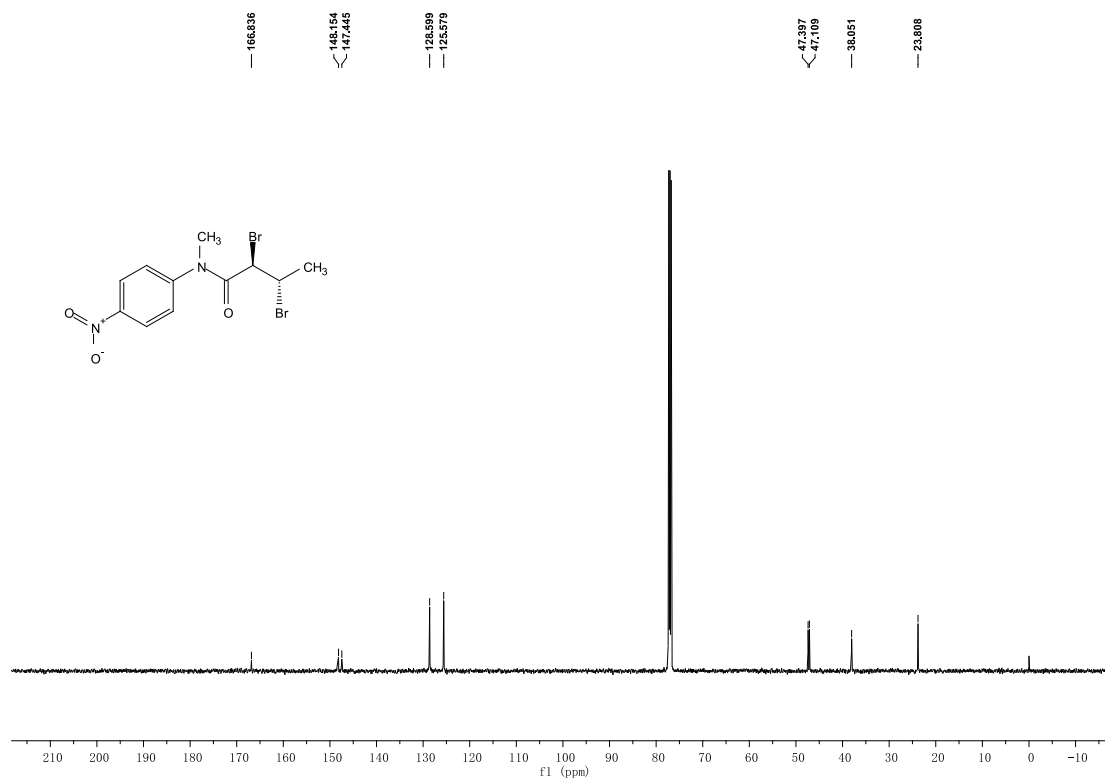

### 4k <sup>1</sup>H NMR

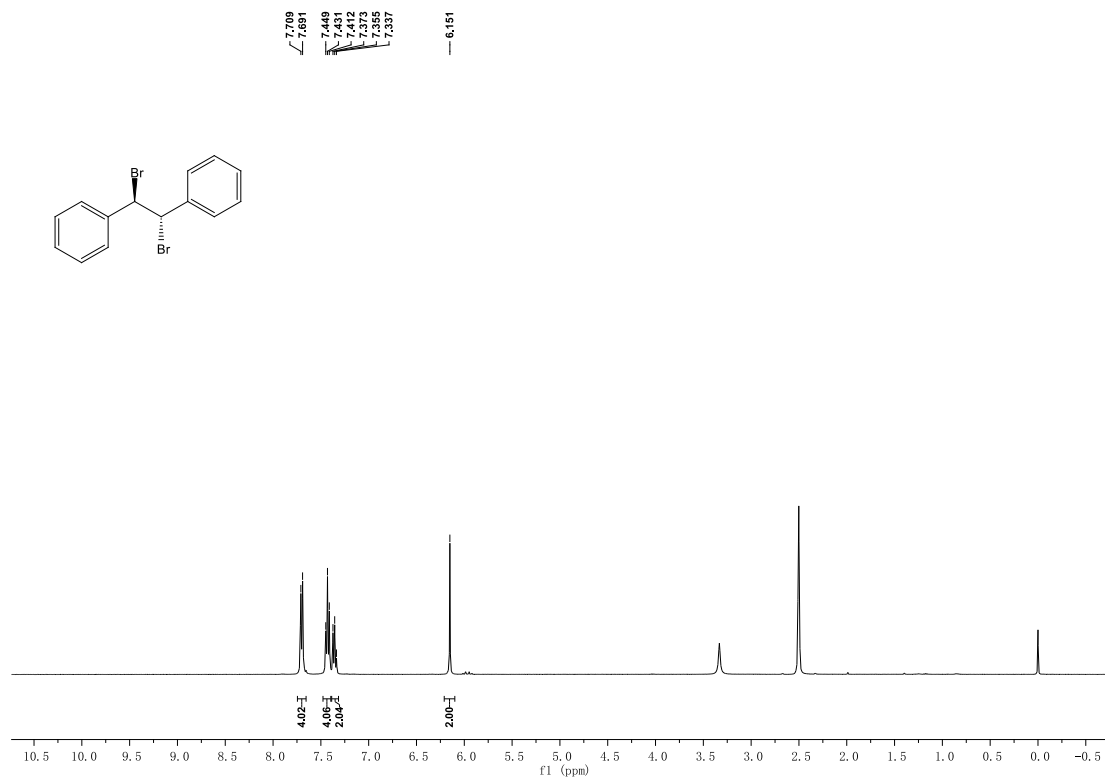

4k <sup>13</sup>C NMR

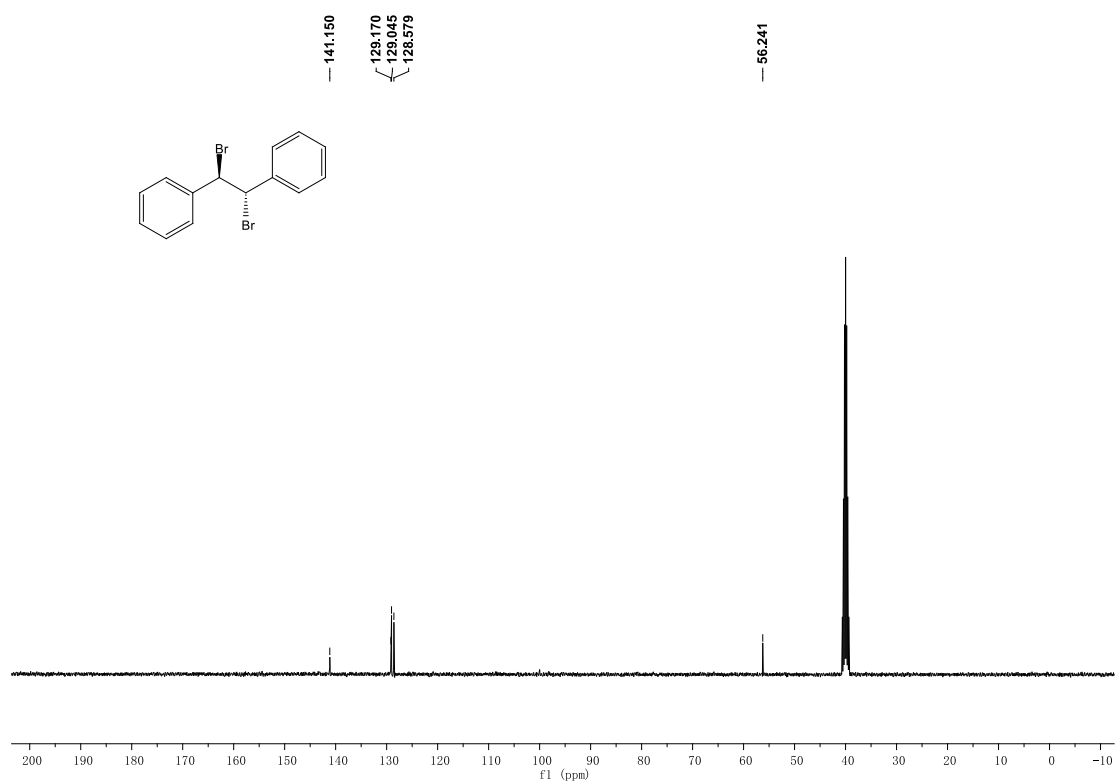

4l <sup>1</sup>H NMR

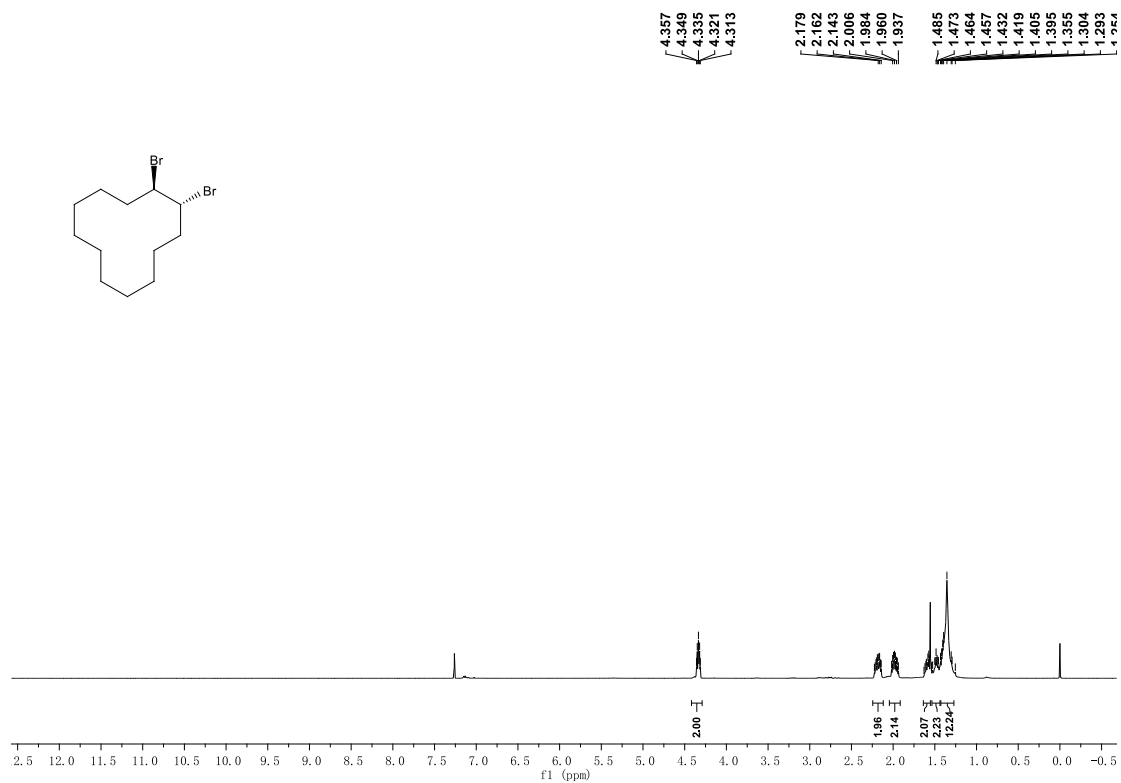

4l <sup>13</sup>CNMR

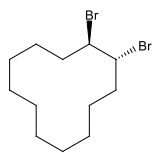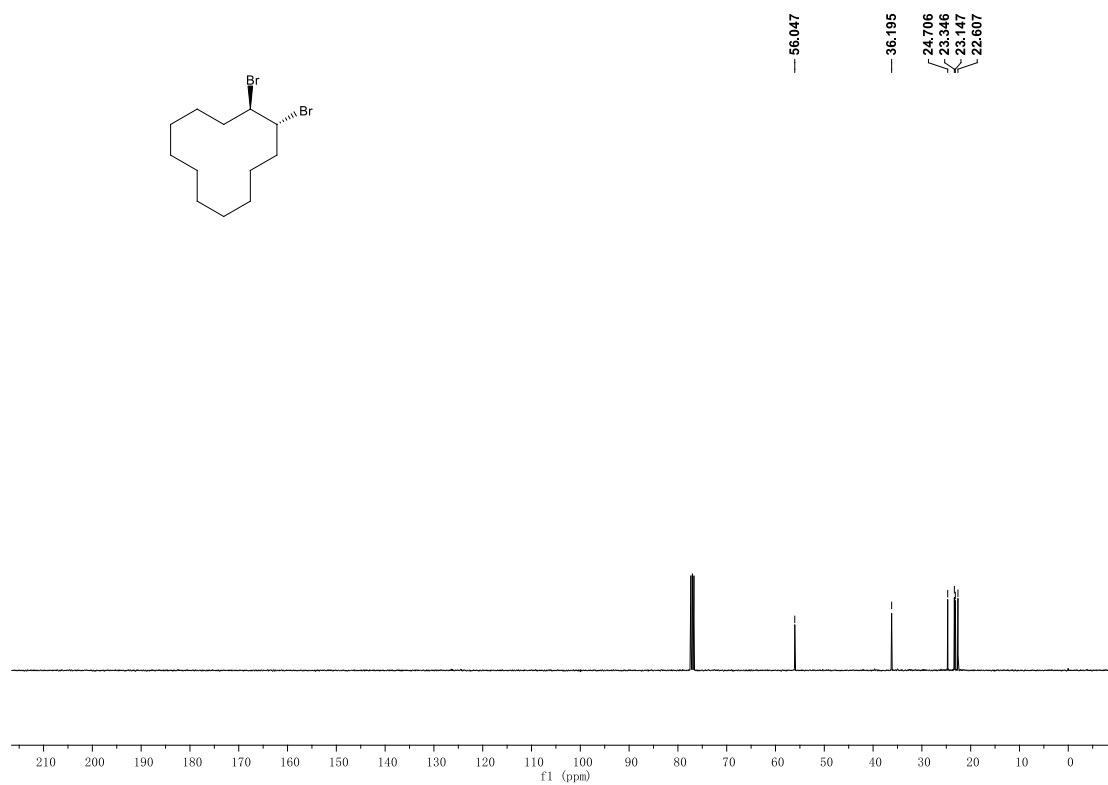

4m <sup>1</sup>HNMR

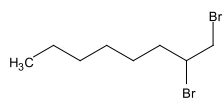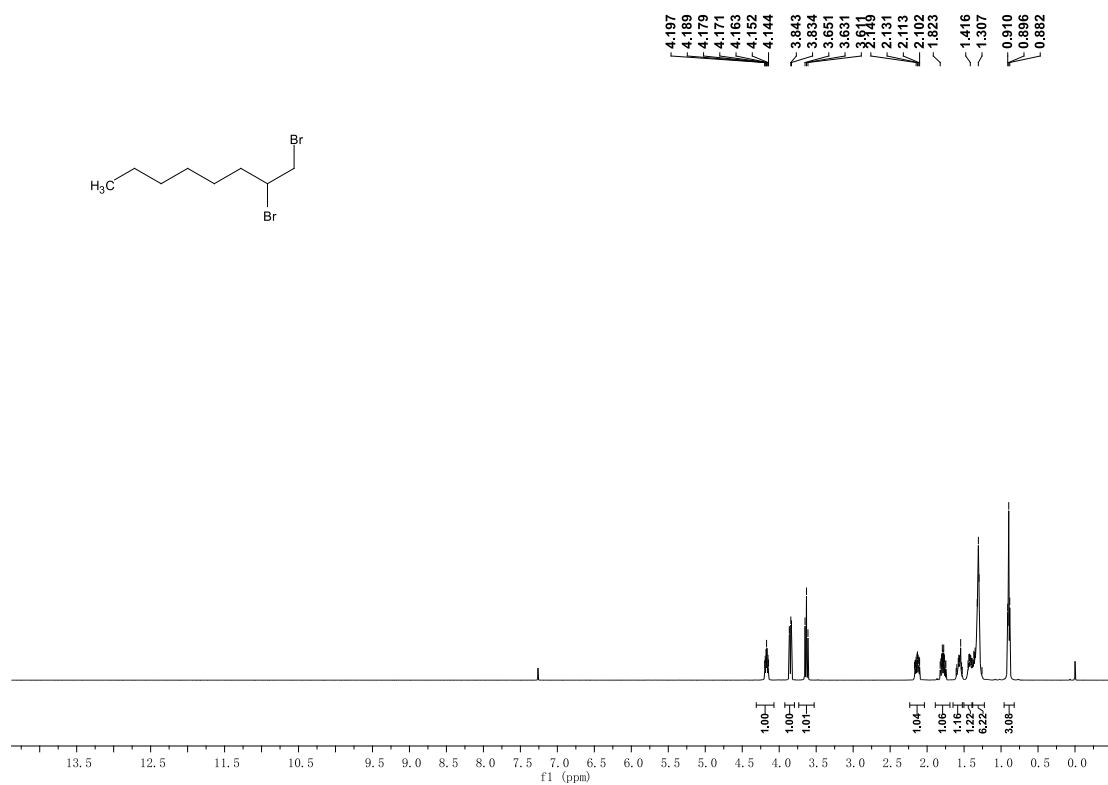



4m <sup>13</sup>CNMR

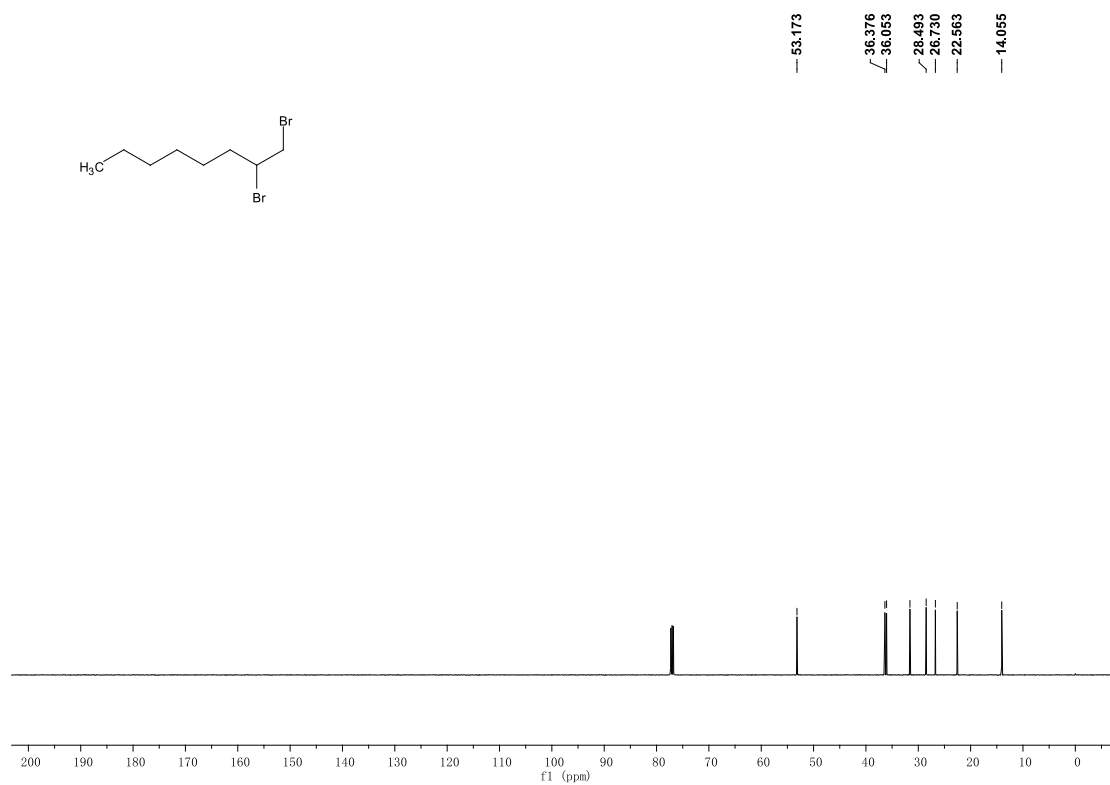

4n <sup>1</sup>H NMR

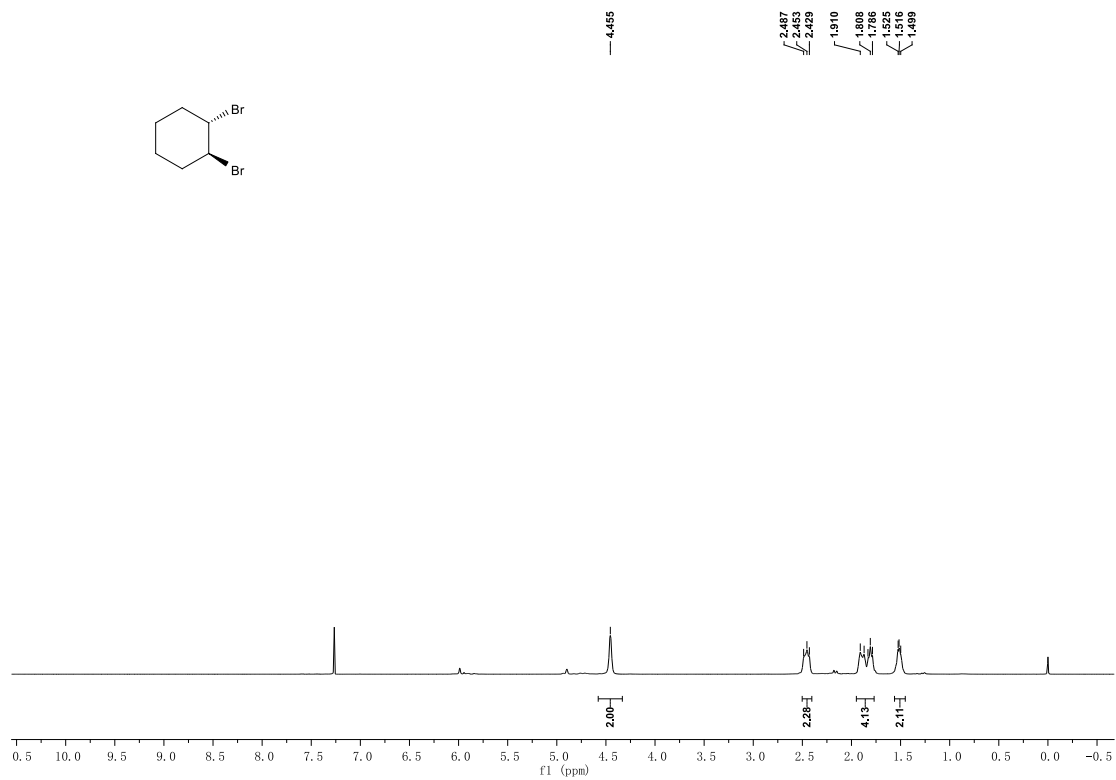

### 4n <sup>13</sup>C NMR

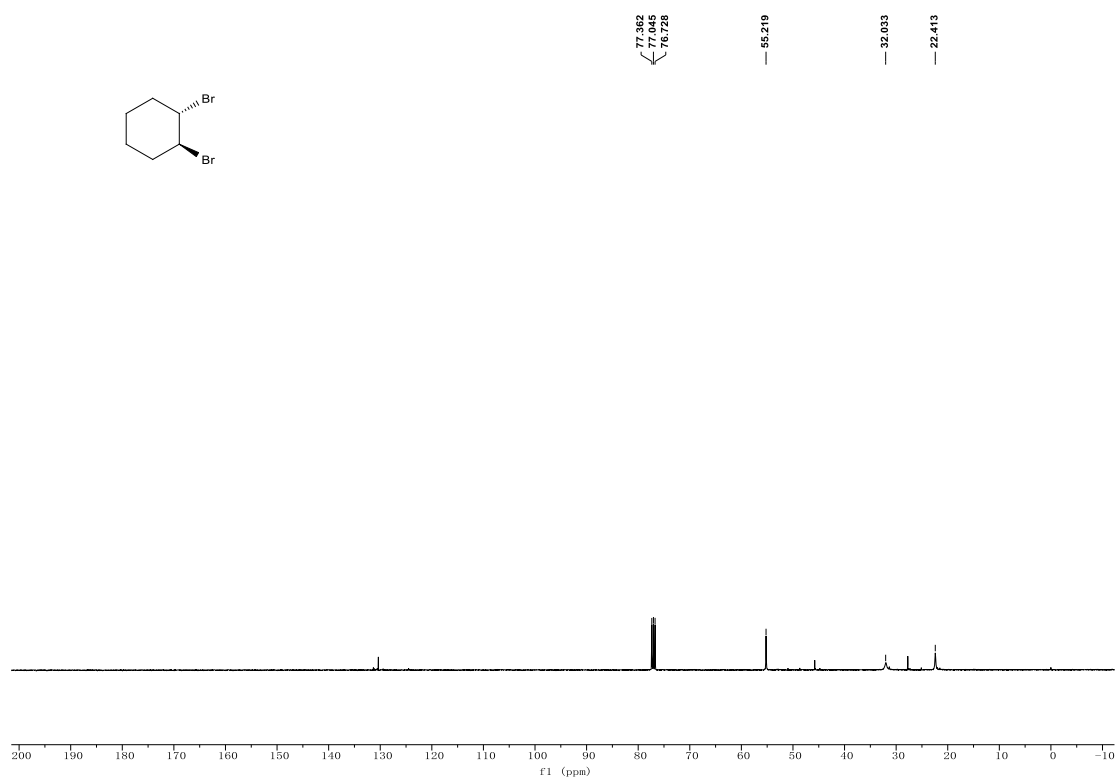

### 4o <sup>1</sup>H NMR

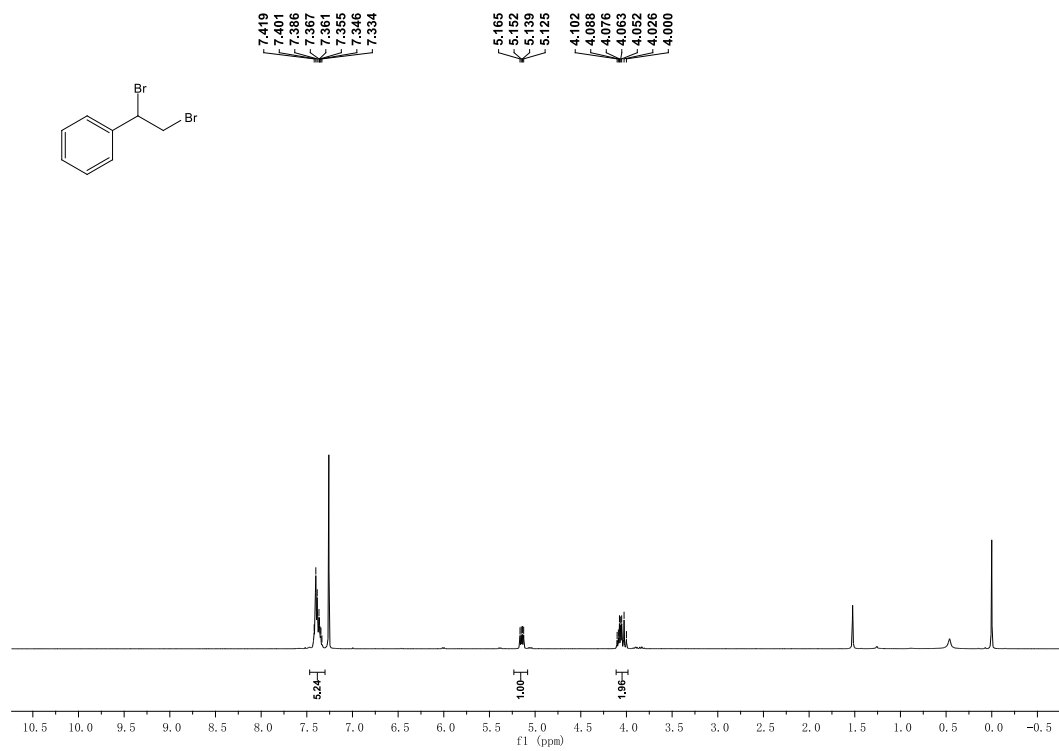

### 4o <sup>13</sup>C NMR

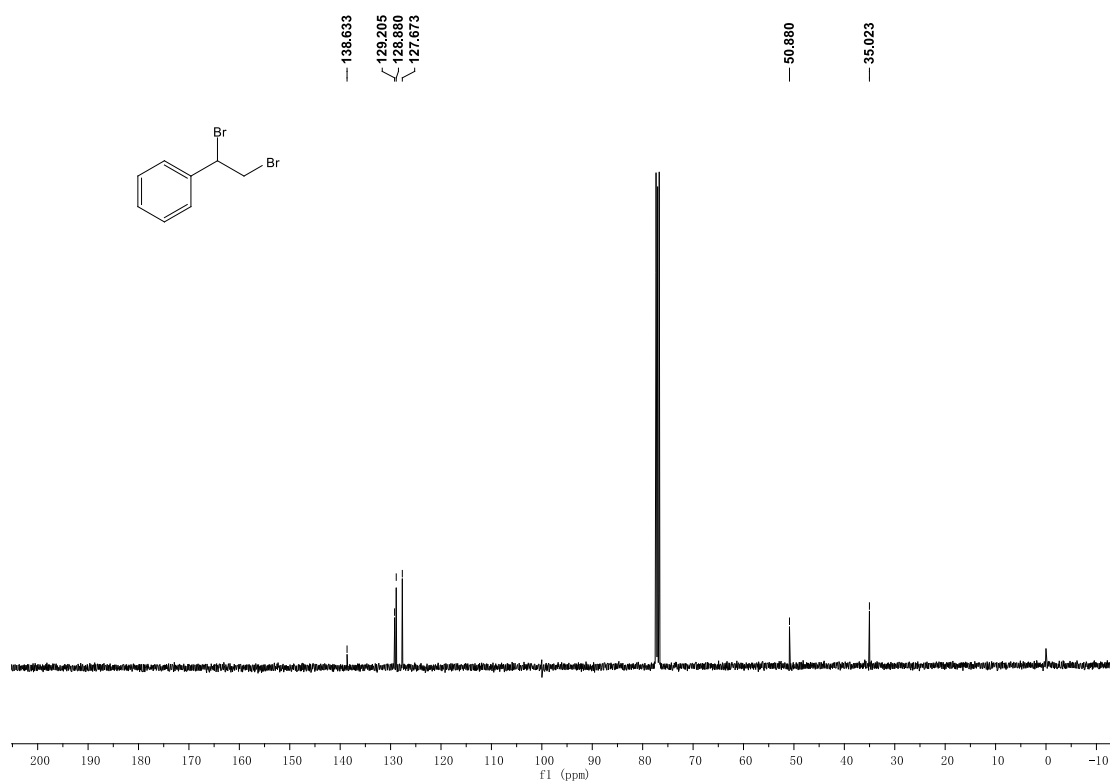

### 4p <sup>1</sup>H NMR

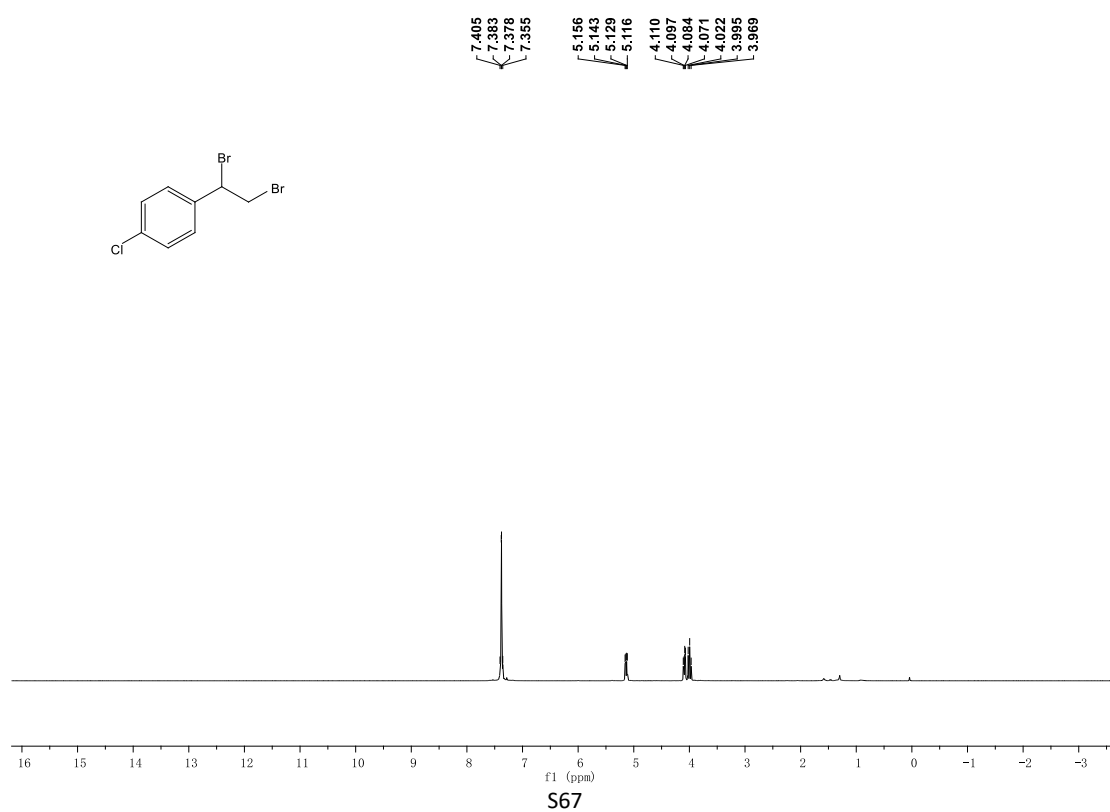

4p <sup>13</sup>CNMR

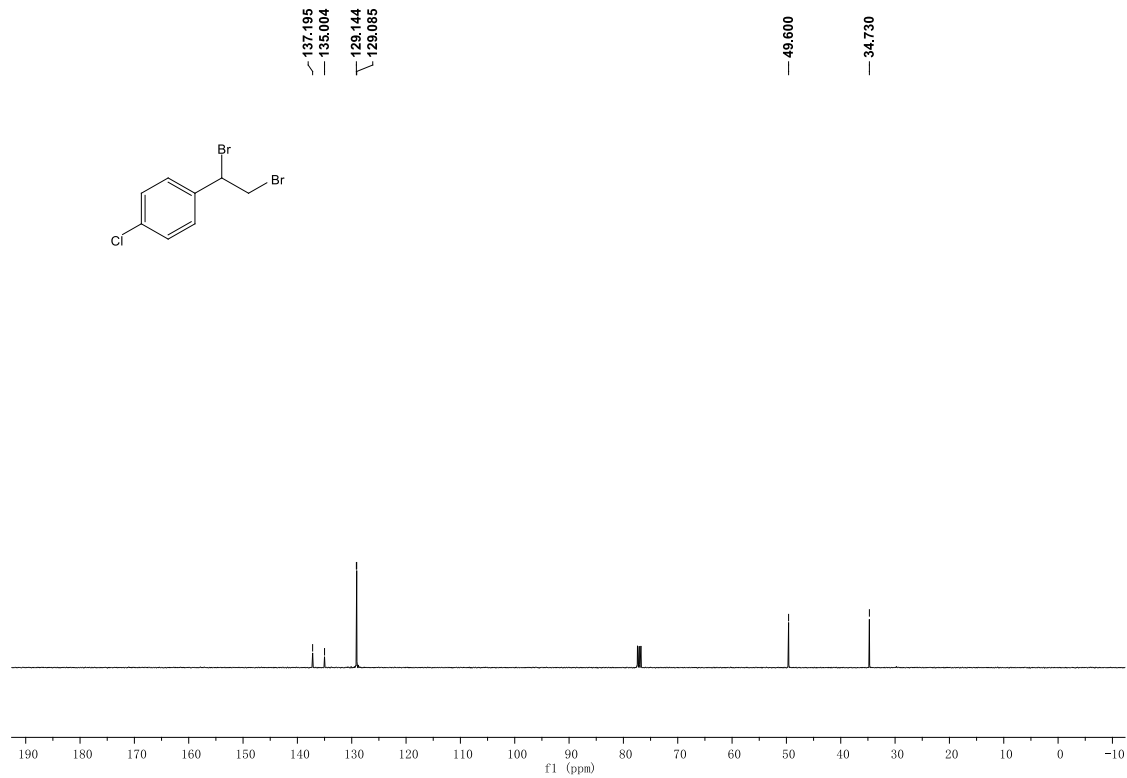

4q <sup>1</sup>H NMR

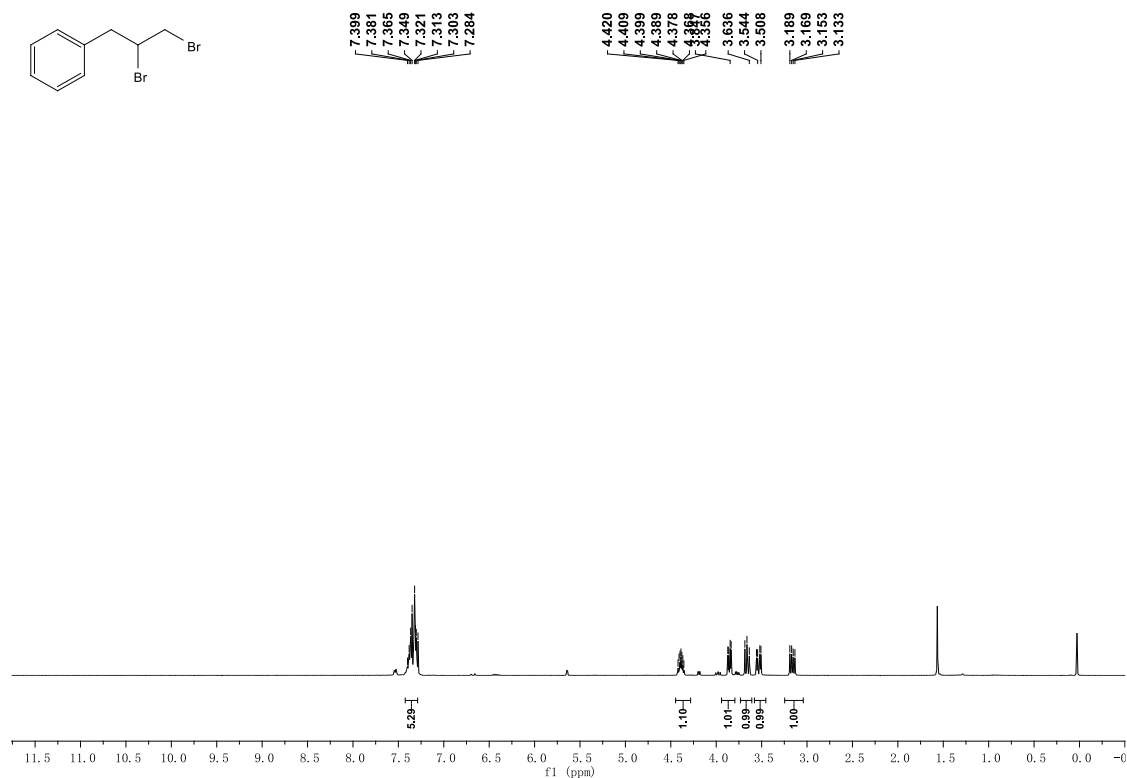

### 4q <sup>13</sup>C NMR

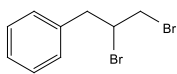

136.863  
129.515  
128.521  
127.213

52.430  
42.006  
36.048

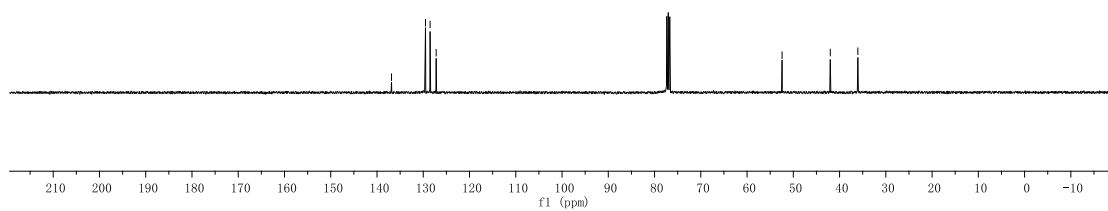

### 6a <sup>1</sup>H NMR

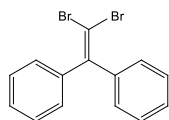

7.359  
7.339  
7.334  
7.323  
7.320  
7.310  
7.297  
7.293  
7.277  
7.273

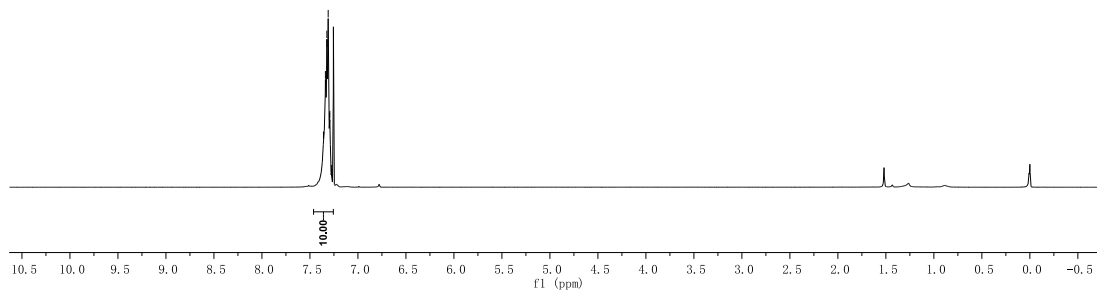

**6a**  $^{13}\text{C}$  NMR

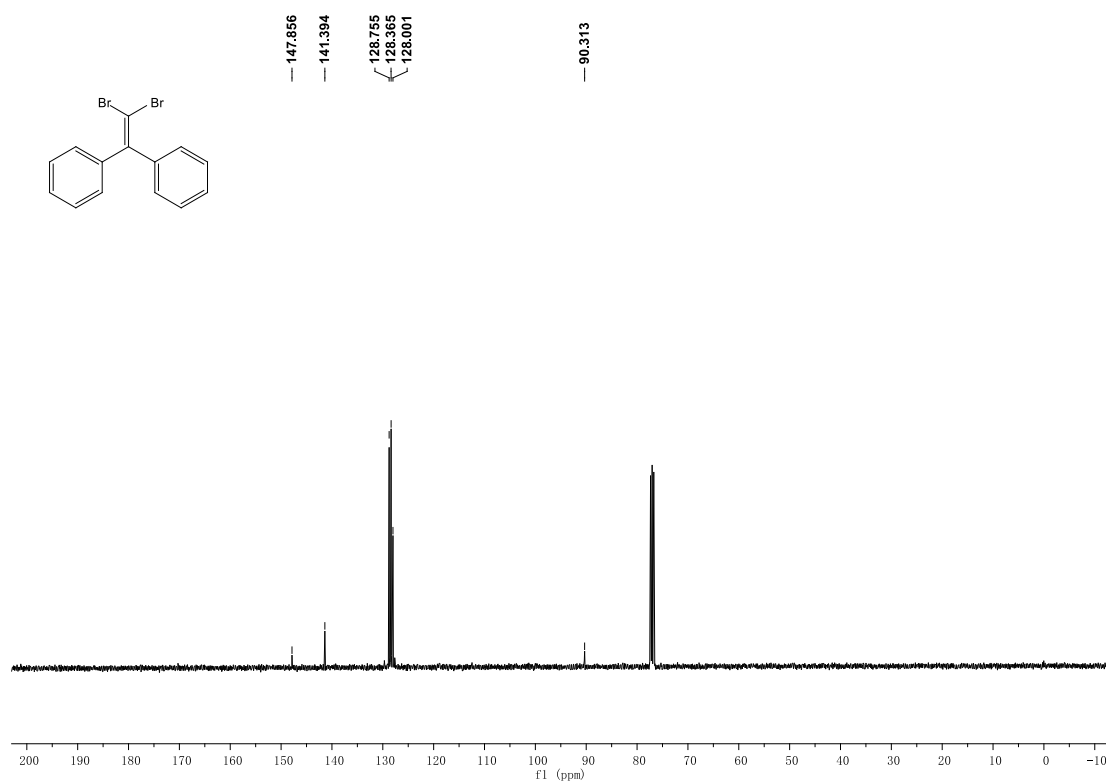

**6b**  $^1\text{H}$  NMR

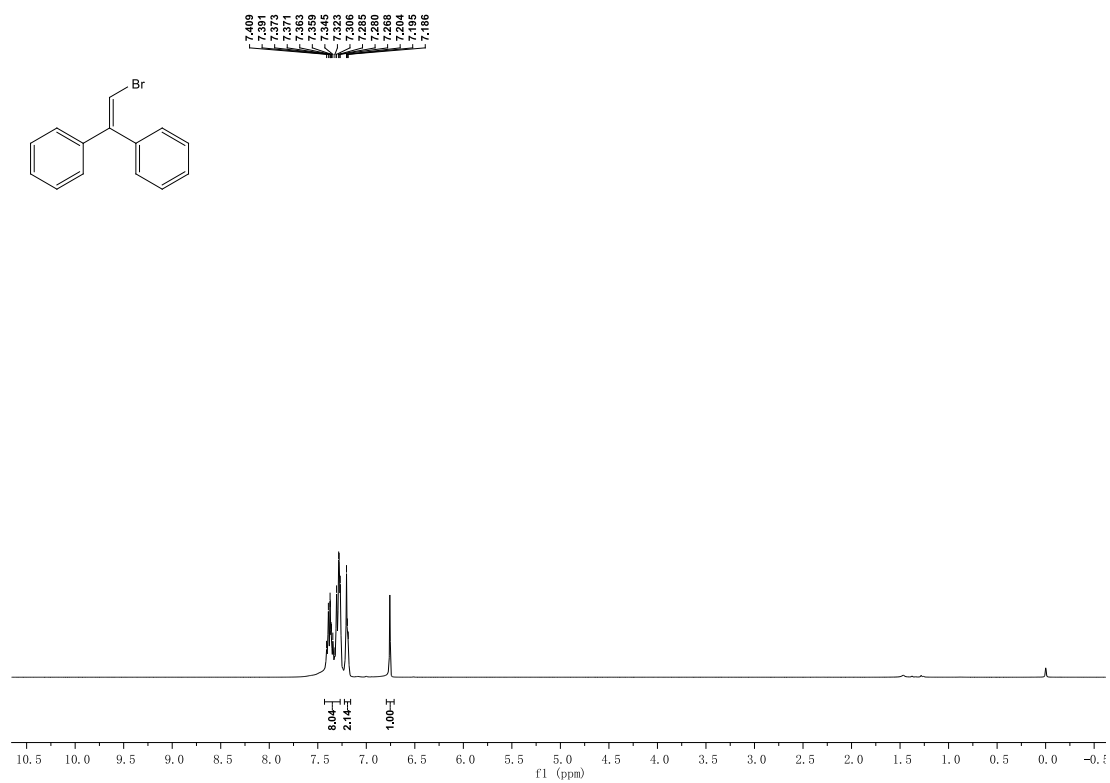

**6b**  $^{13}\text{C}$  NMR

146.912  
139.149  
129.738  
128.503  
128.307  
128.191  
128.052  
127.694  
105.279

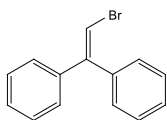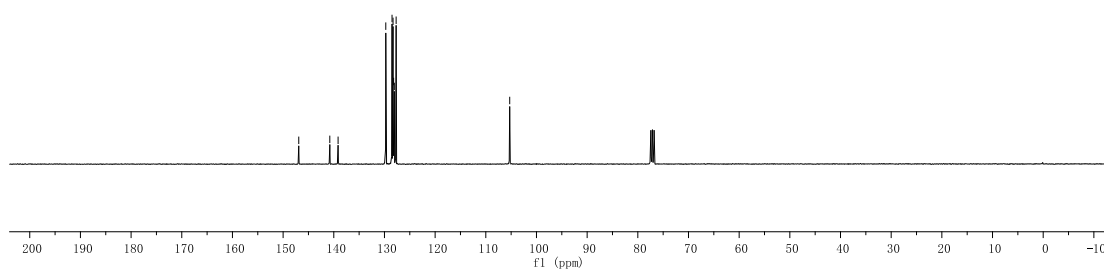

**6c**  $^1\text{H}$  NMR

7.472  
7.455  
7.445  
7.341  
7.327  
7.318  
7.306  
7.290  
7.273  
7.258  
7.184  
7.167

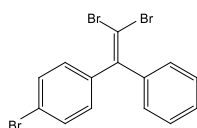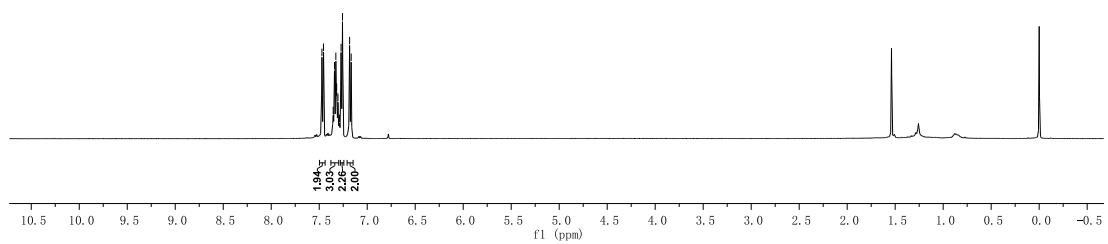

### 6c <sup>13</sup>C NMR

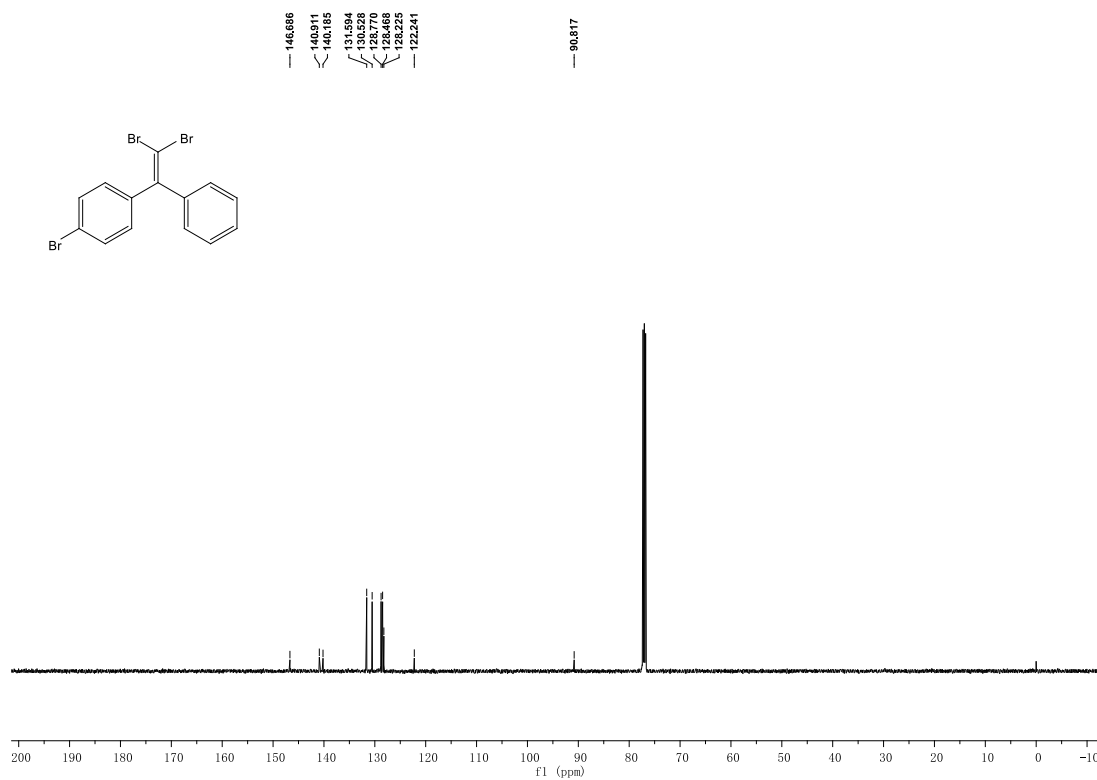

### 6d <sup>1</sup>H NMR

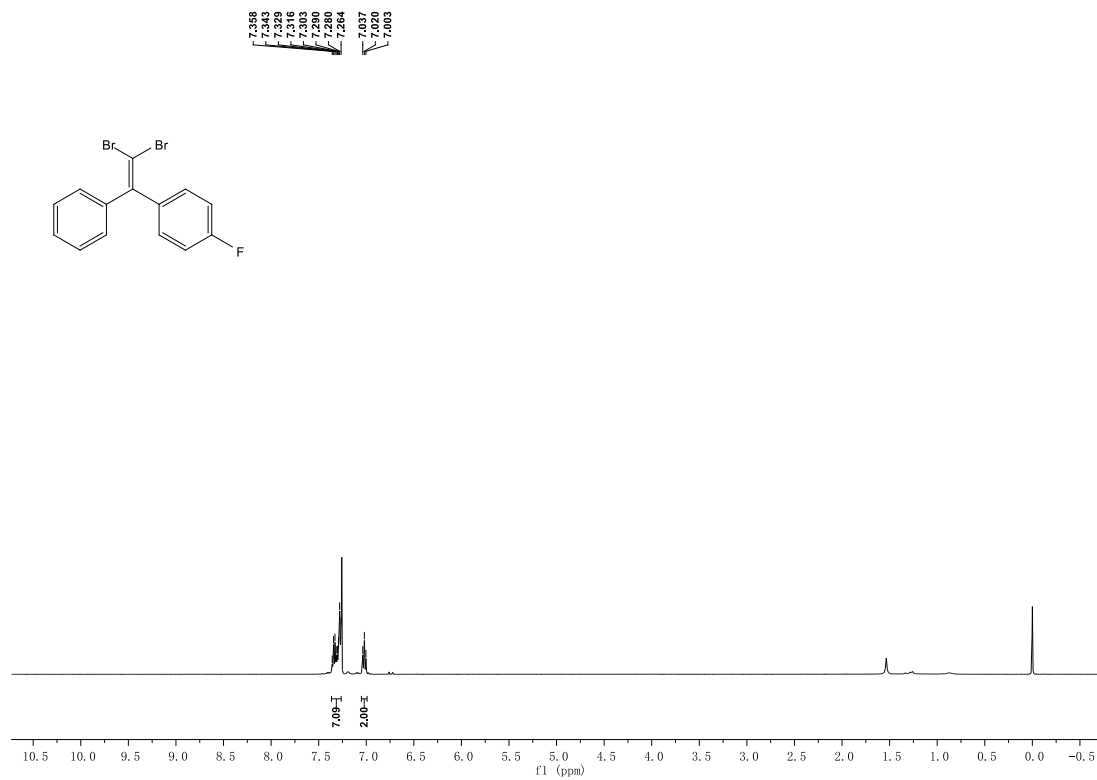



**6d**  $^{13}\text{C}$  NMR

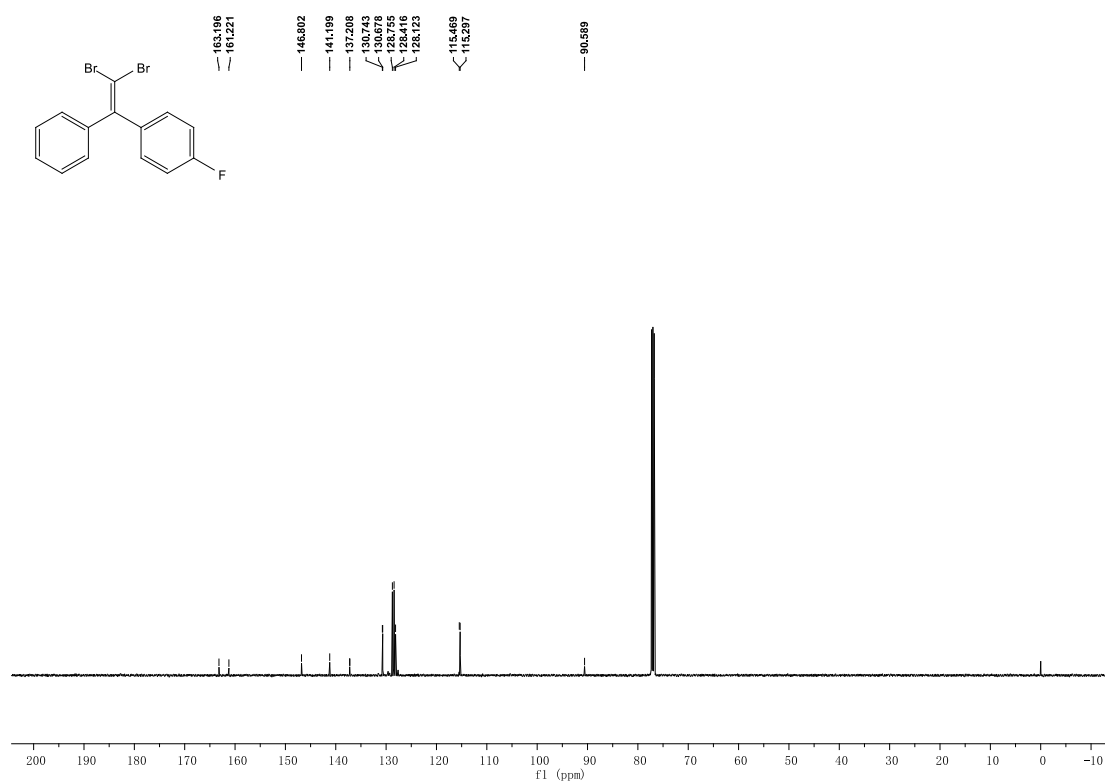

**6d**  $^{19}\text{F}$  NMR

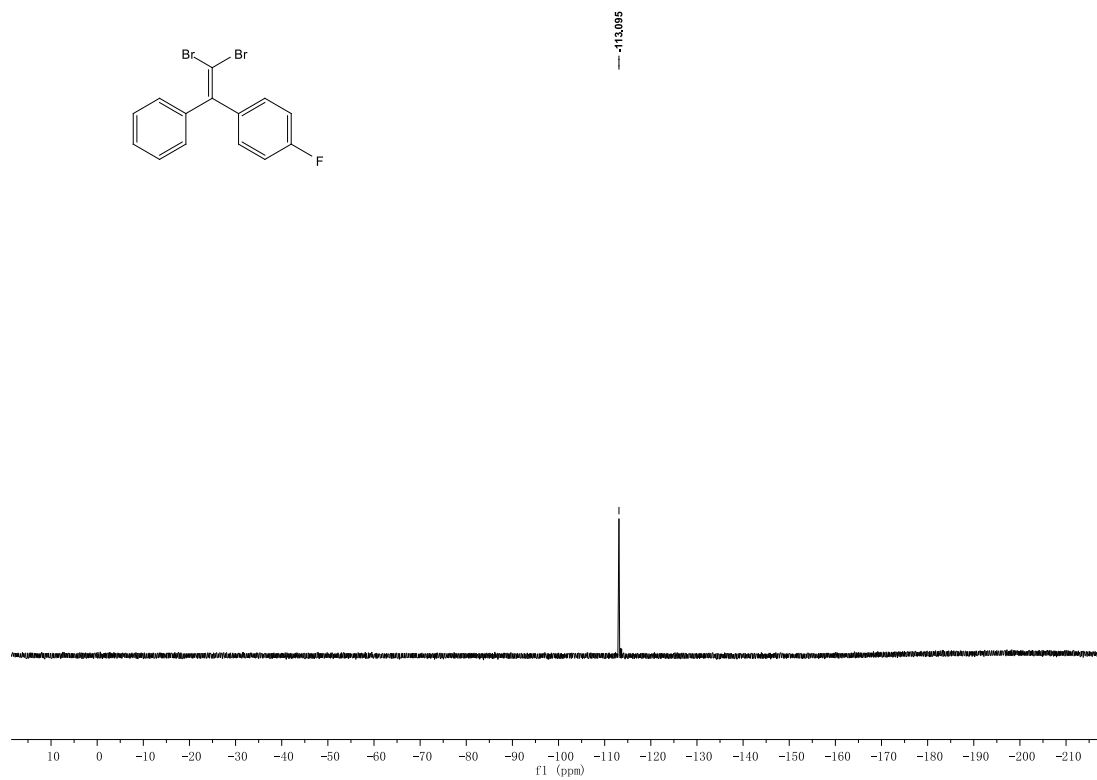

### 6e <sup>1</sup>H NMR

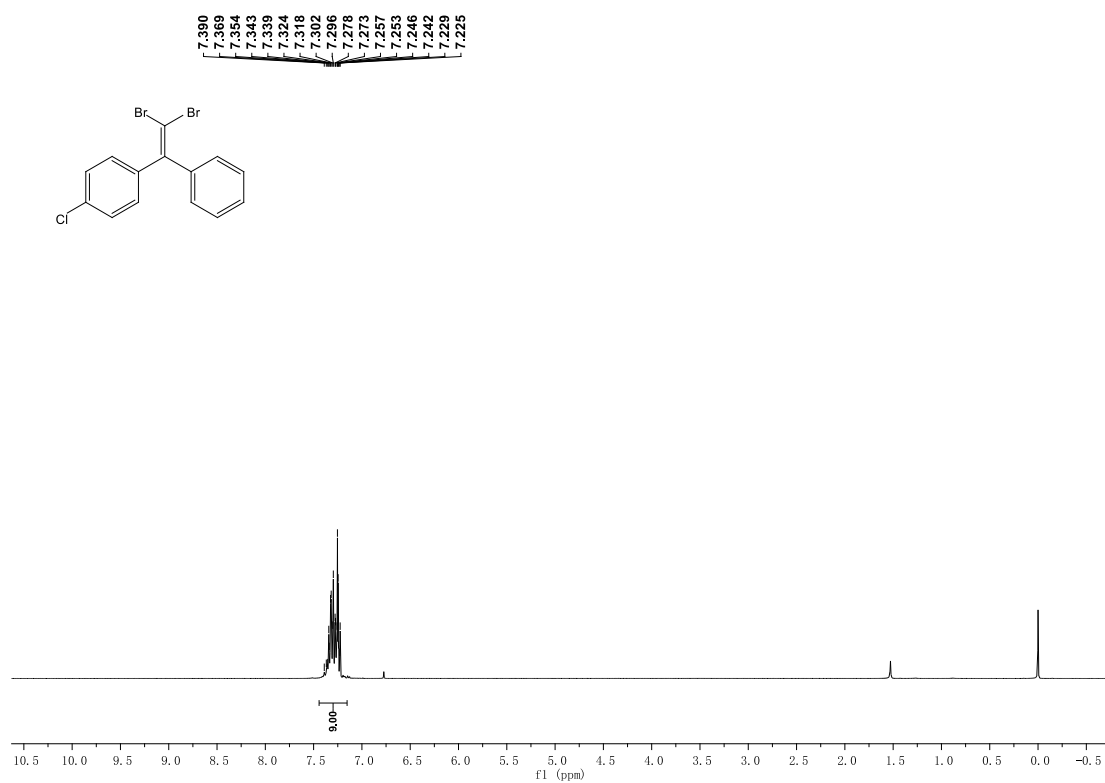

### 6e <sup>13</sup>C NMR

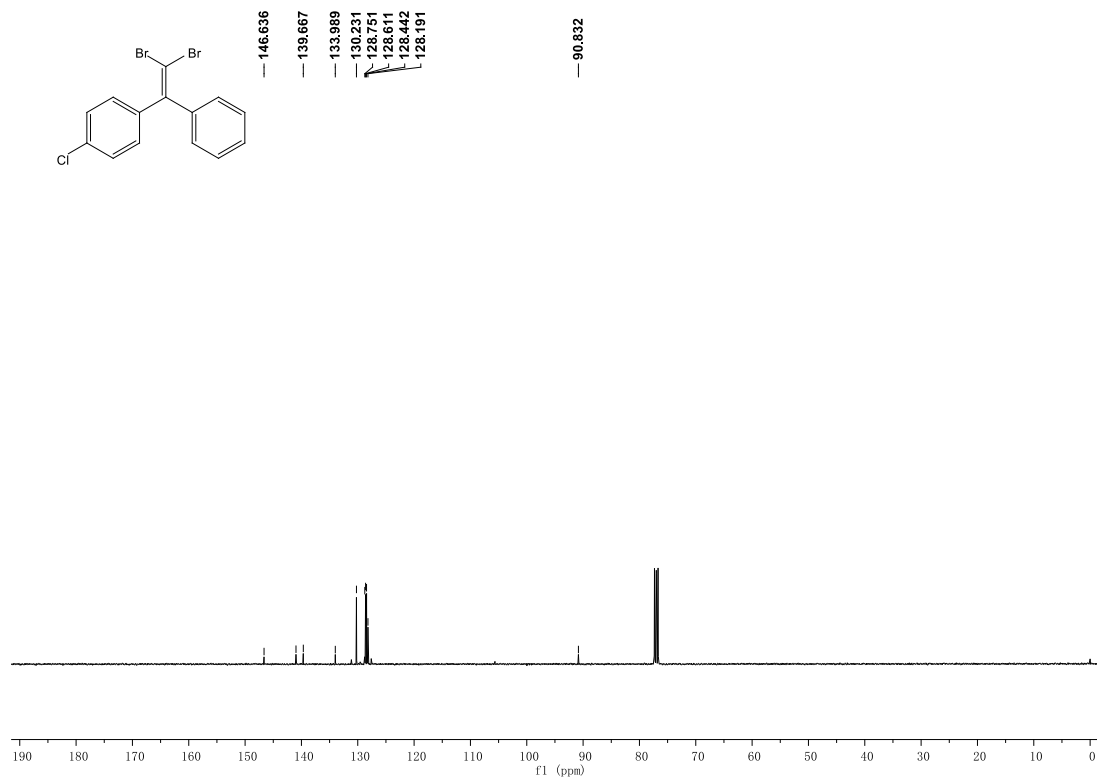

### 6f <sup>1</sup>H NMR

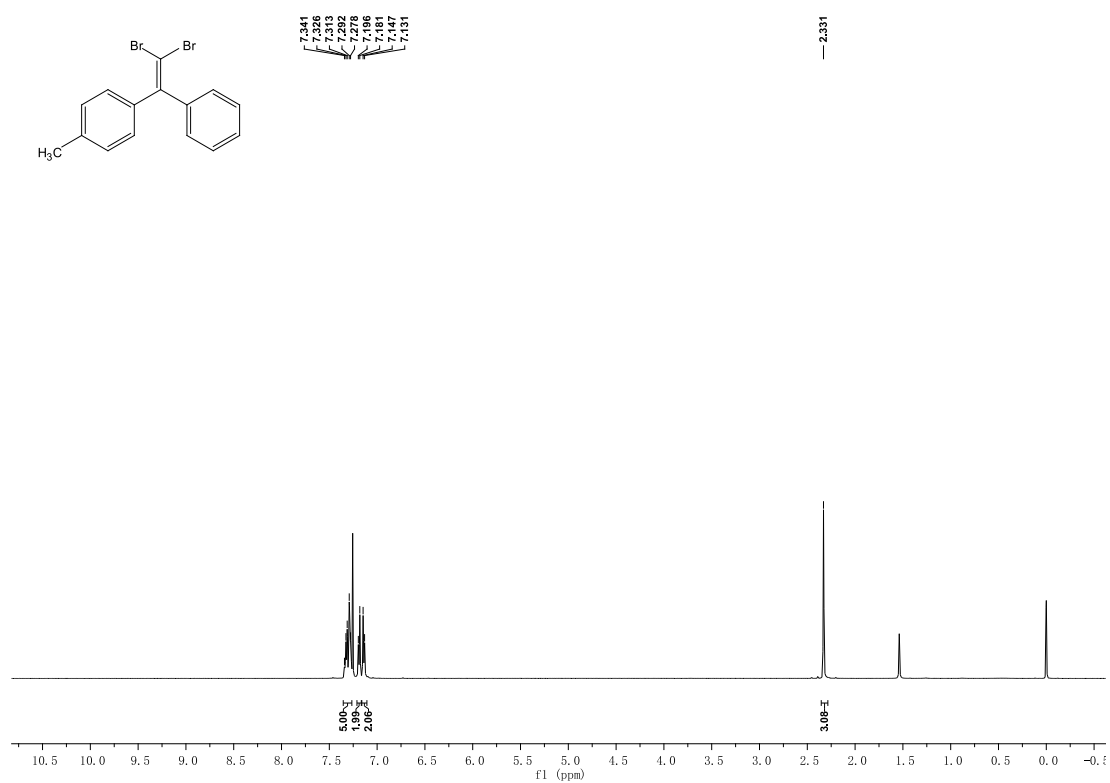

### 6f <sup>13</sup>C NMR

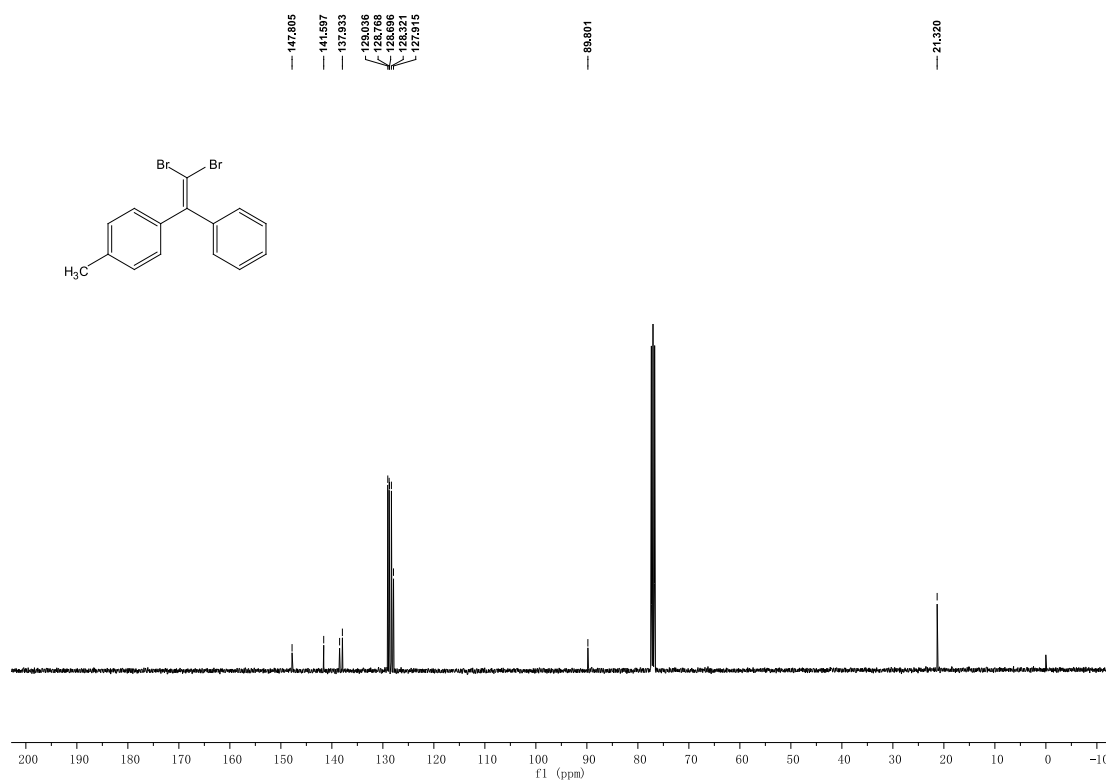

### 6g <sup>1</sup>H NMR

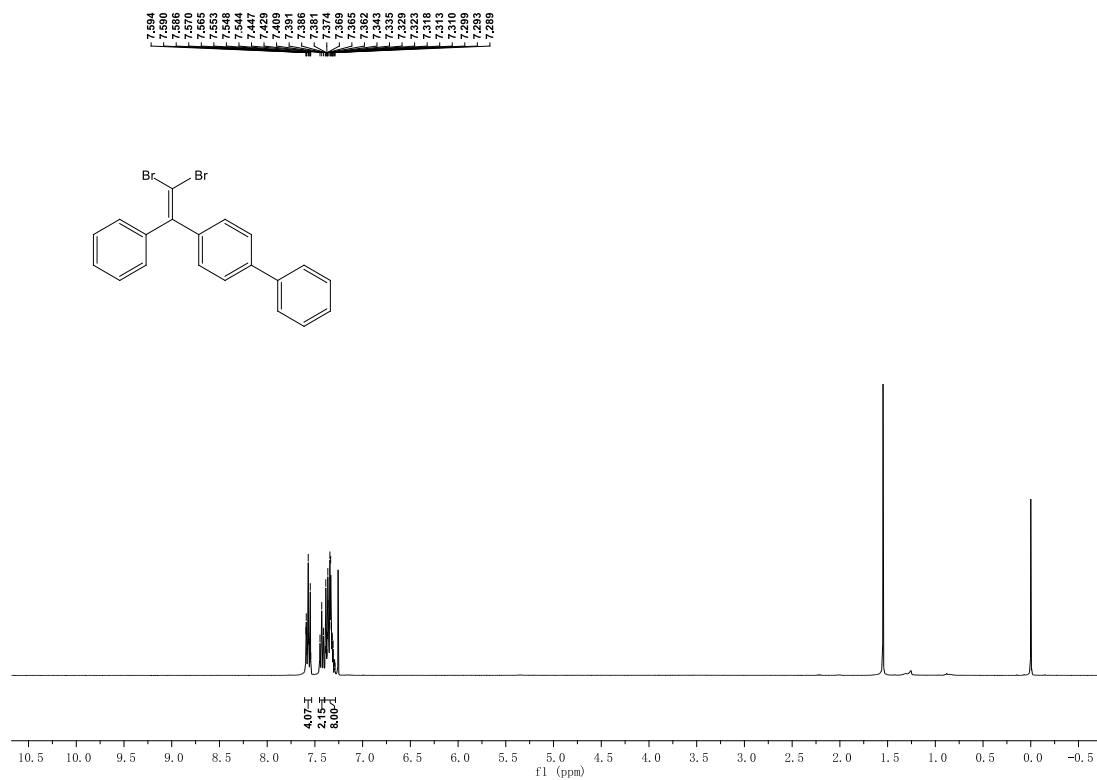

### 6g <sup>13</sup>C NMR

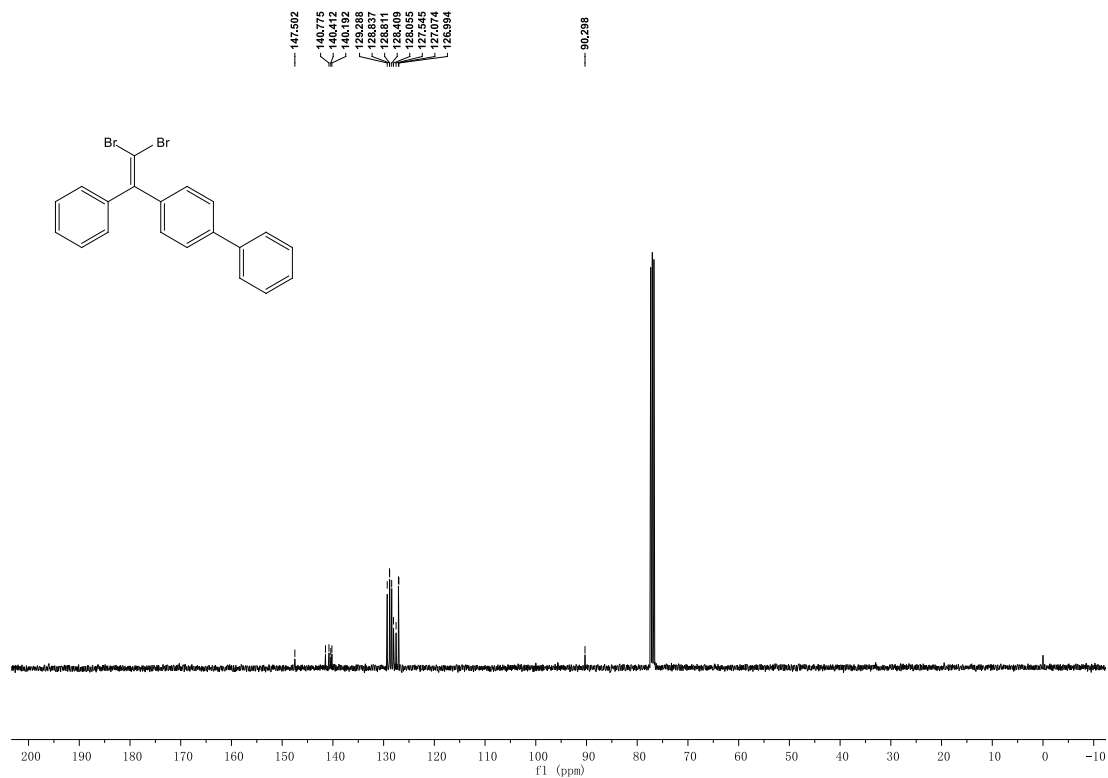

### 6h <sup>1</sup>H NMR

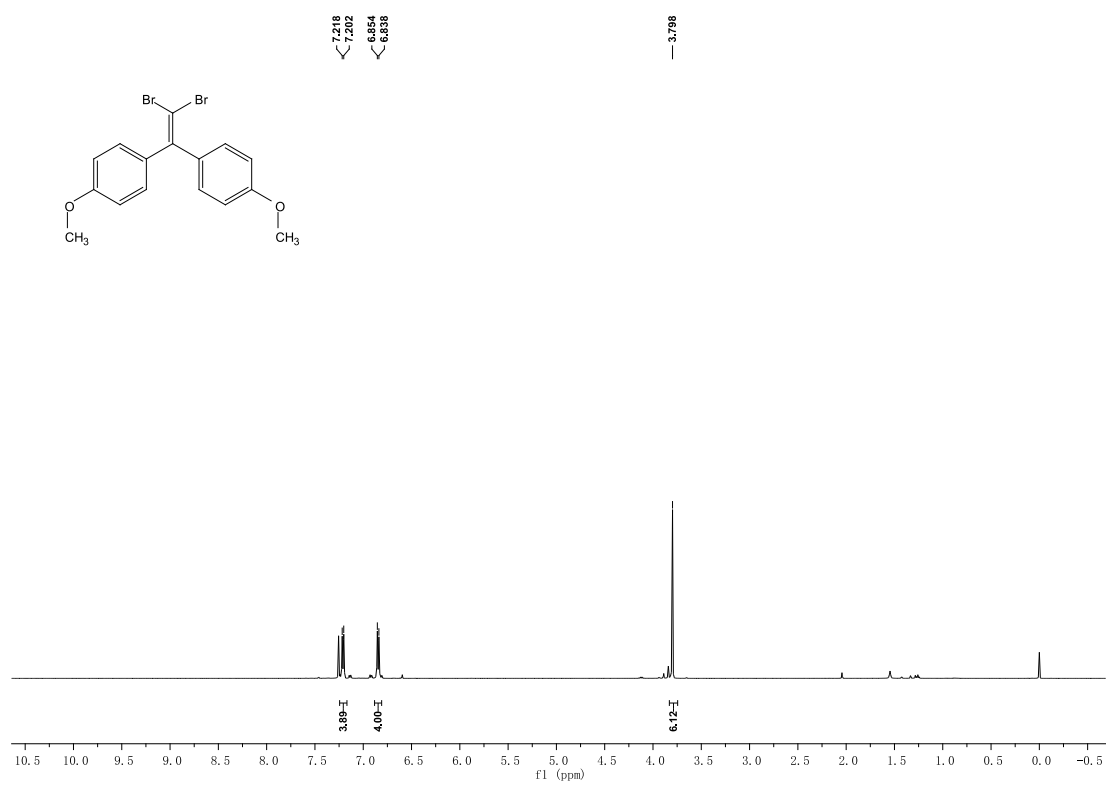

### 6h <sup>13</sup>C NMR

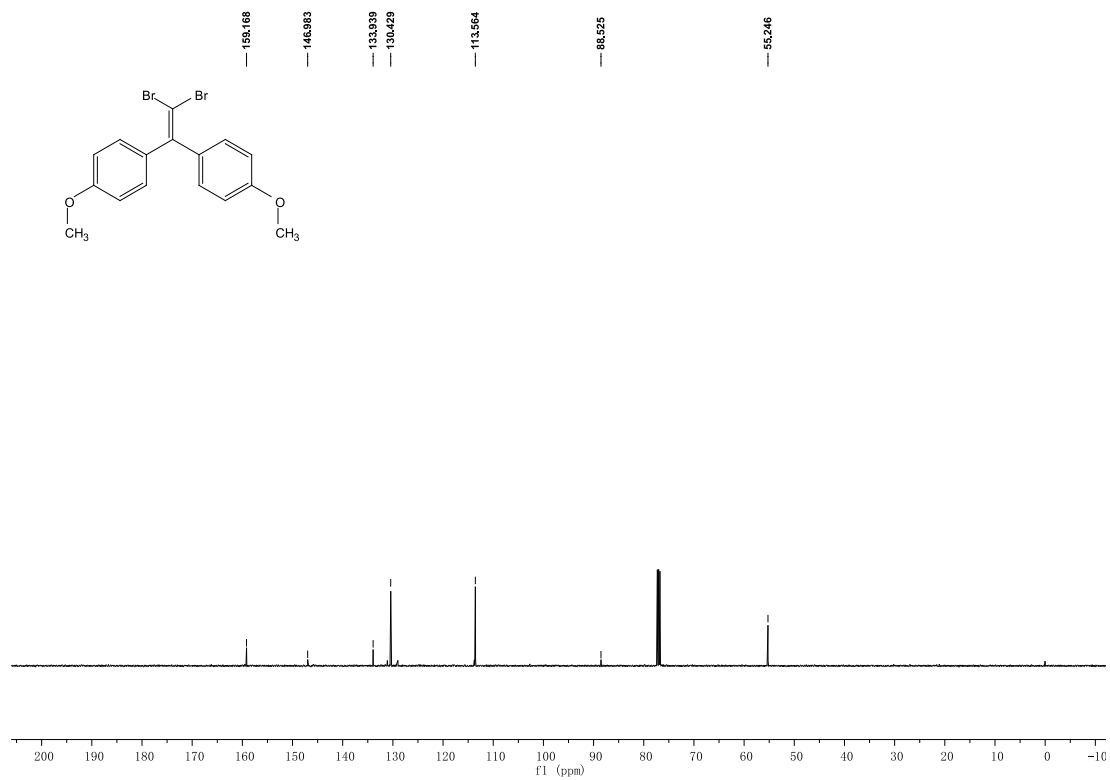

**7a** <sup>1</sup>H NMR

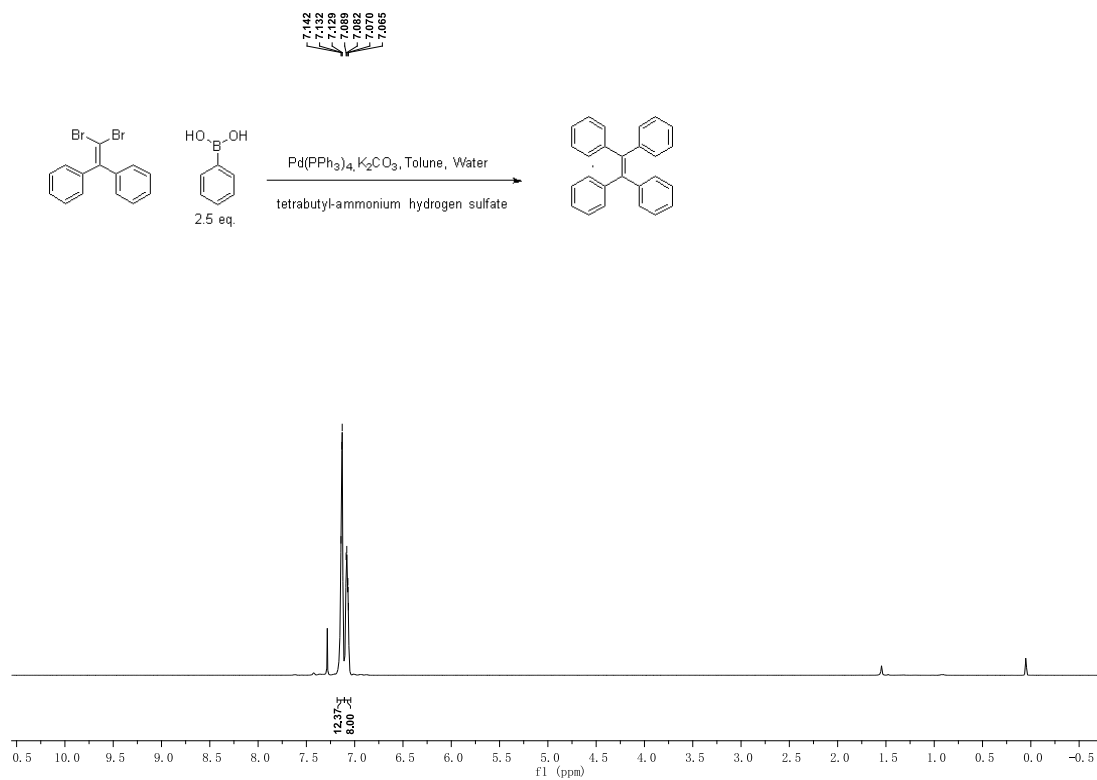

**7a** <sup>13</sup>C NMR

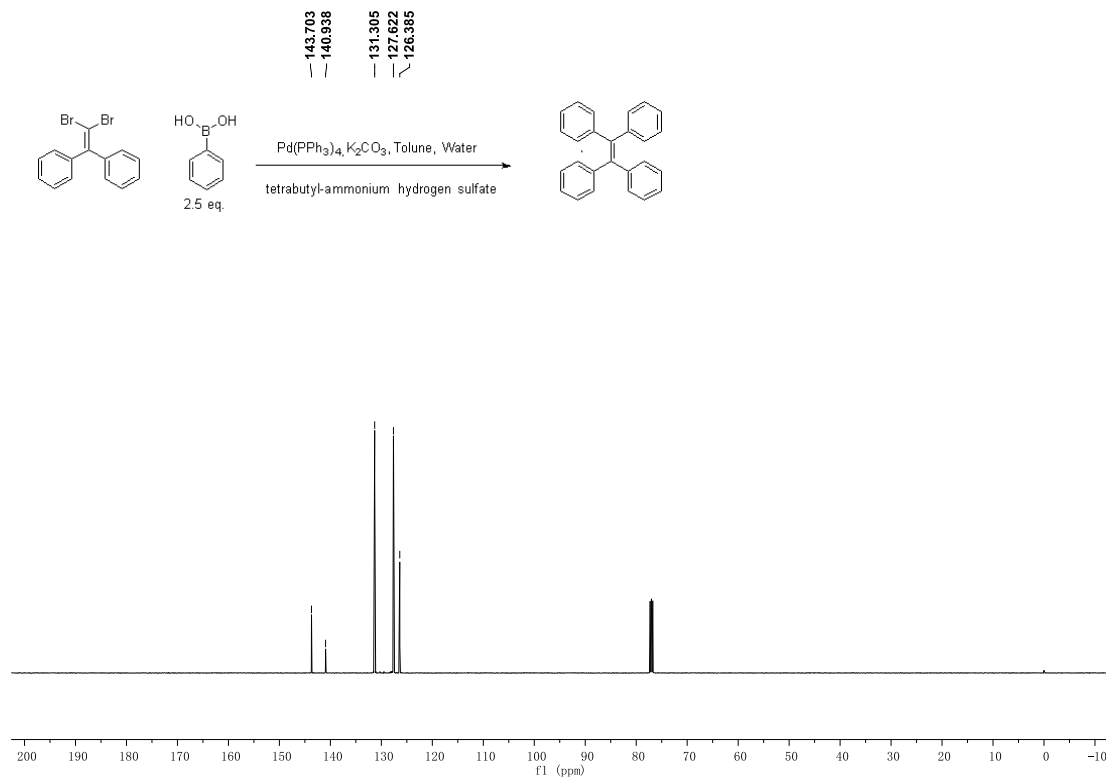

### Succinimide $^1\text{H}$ NMR

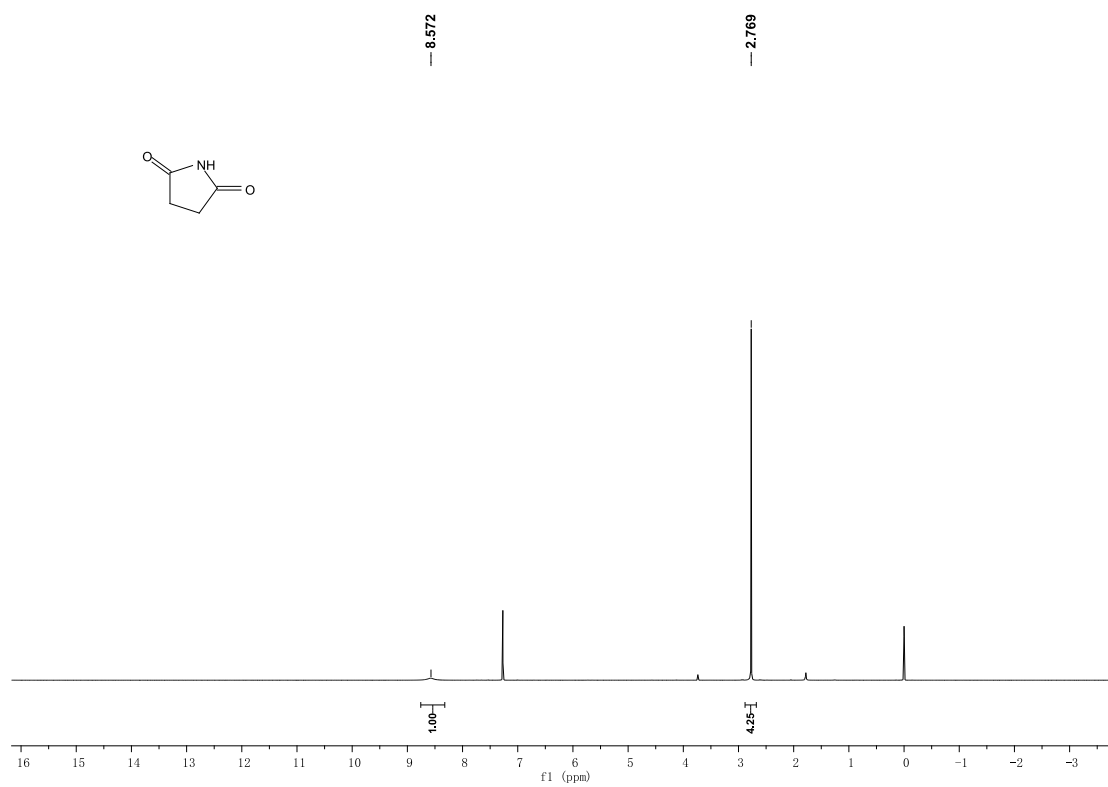

### Succinimide $^{13}\text{C}$ NMR

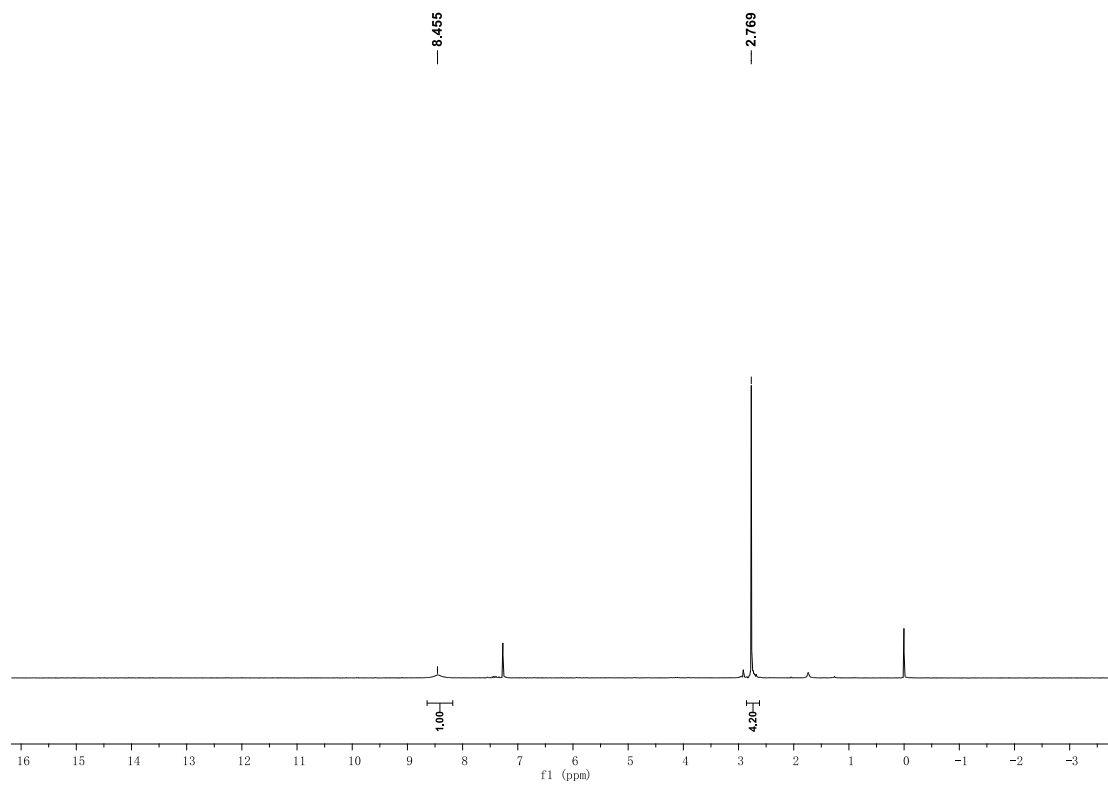

Supplement: d1cc04534b1.pdf [file d1cc04534b1.pdf]
